# Supplementary material for: Management factors affecting physical health and welfare of tourist camp elephants in Thailand
Source: PeerJ. 2019 Apr 25;7:e6756. doi: 10.7717/peerj.6756 (PMC6487189; doi:10.7717/peerj.6756)
Supplement: Supplemental Information 3 [file peerj-07-6756-s003.xlsx]

## Sheet: Table 1
Camp ID	Elephant ID	Sex	Type of Work
1	1	M	Riding Bareback
1	2	M	Riding Bareback
1	3	M	Riding Bareback
1	4	F	Riding Bareback
1	5	F	Riding Bareback
1	6	F	Riding Bareback
1	7	F	Riding Bareback
1	8	F	Riding Bareback
1	9	F	Riding Bareback
1	10	F	Riding Bareback
1	11	F	Riding Bareback
1	12	F	Riding Bareback
2	13	M	Riding Bareback
2	14	M	No Riding
2	15	M	Riding Bareback
2	16	M	Riding Bareback
2	17	M	Riding Bareback
2	18	F	Riding Bareback
2	19	F	Riding Bareback
2	20	F	Riding Bareback
2	21	F	Riding Bareback
2	22	F	Riding Bareback
2	23	F	Riding Bareback
2	24	F	Riding Bareback
2	25	F	Riding Bareback
2	26	F	Riding Bareback
3	27	M	Riding with a Saddle
3	28	M	Riding with a Saddle
3	29	M	Riding with a Saddle
3	30	M	Riding with a Saddle
3	31	M	Riding with a Saddle
3	32	M	Riding with a Saddle
3	33	F	Riding with a Saddle
3	34	F	Riding with a Saddle
3	35	F	Riding with a Saddle
3	36	F	Riding with a Saddle
3	37	F	Riding with a Saddle
3	38	F	Riding with a Saddle
4	39	M	Riding with a Saddle
4	40	M	Riding with a Saddle
4	41	M	Riding with a Saddle
4	42	M	Elephant Show
4	43	M	Elephant Show
4	44	M	Riding with a Saddle
4	45	F	Riding with a Saddle
4	46	F	Riding with a Saddle
4	47	F	Riding with a Saddle
4	48	F	Riding with a Saddle
4	49	F	Riding with a Saddle
4	50	F	Riding with a Saddle
5	51	F	No Riding
5	52	F	Observation
5	53	F	Observation
5	54	F	No Riding
5	55	F	No Riding
5	56	F	No Riding
5	57	F	No Riding
5	58	F	Observation
5	59	F	Observation
5	60	F	Observation
5	61	F	No Riding
5	62	F	Observation
5	63	F	No Riding
5	64	F	Observation
5	65	F	No Riding
6	66	M	Riding with a Saddle
6	67	M	Elephant Show
6	68	M	Riding with a Saddle
6	69	M	Riding with a Saddle
6	70	F	Riding with a Saddle
6	71	M	Riding with a Saddle
6	72	F	Riding with a Saddle
6	73	F	Riding with a Saddle
6	74	F	Riding with a Saddle
6	75	F	Riding with a Saddle
6	76	F	Riding with a Saddle
6	77	F	Riding with a Saddle
6	78	M	Riding with a Saddle
7	81	F	Riding with a Saddle
7	82	F	Riding with a Saddle
7	83	F	Riding with a Saddle
7	84	F	Riding with a Saddle
7	85	F	Riding with a Saddle
8	86	M	Riding Bareback
8	87	F	No Riding
8	88	F	No Riding
8	89	F	Riding Bareback
8	90	F	No Riding
8	91	F	Riding Bareback
9	92	M	No Riding
9	93	F	No Riding
9	94	F	No Riding
9	95	F	No Riding
9	96	F	No Riding
10	97	M	Riding Bareback
10	98	F	Riding Bareback
10	99	F	Riding Bareback
10	100	F	Riding Bareback
10	101	F	Riding Bareback
10	102	F	Riding Bareback
11	103	M	Riding Bareback
11	104	M	Riding Bareback
11	105	F	Riding Bareback
11	106	F	Riding Bareback
11	107	F	Riding Bareback
12	108	M	Riding with a Saddle
12	109	F	Riding Bareback
12	110	F	Riding Bareback
12	111	F	Riding Bareback
12	112	M	Elephant Show
13	113	F	Riding Bareback
13	114	F	No Riding
13	115	F	Riding Bareback
13	116	F	Riding Bareback
13	117	F	Riding Bareback
14	118	F	No Riding
14	119	F	No Riding
14	121	F	No Riding
15	122	F	No Riding
15	123	F	No Riding
15	124	F	No Riding
15	126	F	No Riding

## Sheet: Table 4
Time of examination	Elephant ID	Age	Work Hour	Chain Hour	Walk Distance Day	Walk Time Day	Rouphage Day	Supplement Day
1	1	25	4.5	19.5	6000	60	150	30
1	2	28	4.5	19.5	6000	60	150	30
1	3	20	4.5	19.5	6000	60	150	30
1	4	28	4.5	19.5	6000	60	150	30
1	5	25	4.5	19.5	6000	60	150	30
1	6	18	4.5	19.5	6000	60	150	30
1	7	18	4.5	19.5	6000	60	150	30
1	8	18	4.5	19.5	6000	60	150	30
1	9	45	4.5	19.5	6000	60	150	30
1	10	22	4.5	19.5	6000	60	150	30
1	11	16	4.5	19.5	0	0	150	30
1	12	25	4.5	19.5	6000	60	150	30
1	13	21	4.5	19.5	2000	80	210	30
1	14	29	0	23.5	1000	25	210	30
1	15	50	4.5	19.5	2000	80	210	30
1	16	30	4.5	19.5	2000	80	210	30
1	17	16	4.5	19.5	2000	80	210	30
1	18	22	4.5	19.5	2000	80	150	30
1	19	25	4.5	19.5	2000	80	150	30
1	20	22	4.5	19.5	2000	80	150	30
1	21	30	4.5	19.5	2000	80	150	30
1	22	30	4.5	19.5	2000	80	150	30
1	23	30	4.5	19.5	2000	80	150	30
1	24	40	4.5	19.5	2000	80	150	30
1	25	30	NA	NA	NA	NA	150	30
1	26	34	NA	NA	NA	NA	150	30
1	27	45	7	17	6500	260	182	10
1	28	47	7	17	6500	260	210	10
1	29	38	7	17	6500	260	182	10
1	30	41	7	17	6500	260	140	10
1	31	40	7	17	6500	260	210	10
1	32	41	5	19	6500	260	140	10
1	33	37	7	17	6500	260	182	10
1	34	43	7	17	6500	260	140	10
1	35	37	7	17	6500	260	182	10
1	36	41	7	17	6500	260	140	10
1	37	40	7	17	6500	260	182	10
1	38	23	7	17	6500	260	182	10
1	39	20	8	16	10000	450	100	10
1	40	42	8	16	10000	450	100	10
1	41	20	0	24	0	0	100	0
1	42	24	0	24	0	0	100	0
1	43	28	7	17	NA	160	100	10
1	44	27	8	16	10000	450	100	10
1	45	45	8	16	10000	450	100	10
1	46	40	8	16	10000	450	100	10
1	47	35	8	16	10000	450	100	10
1	48	42	8	16	10000	450	100	10
1	49	30	8	16	10000	450	100	10
1	50	20	8	16	10000	450	100	10
1	51	46	0	0	2000	30	165	20
1	52	33	5.5	0	2000	30	165	20
1	53	35	5.5	0	2000	30	165	20
1	54	41	5	0	3000	300	165	20
1	55	39	5	0	3000	300	165	20
1	56	30	5	0	3000	300	165	20
1	57	31	0	0	2000	20	165	20
1	58	34	5.5	0	2000	30	165	20
1	59	50	5.5	0	2000	30	165	20
1	60	29	5.5	0	2000	30	165	20
1	61	30	5	0	3000	300	165	20
1	62	40	5.5	0	2000	30	165	20
1	63	25	NA	NA	NA	NA	165	20
1	64	35	NA	NA	NA	NA	165	20
1	65	30	NA	NA	NA	NA	165	20
1	66	40	0	24	0	0	250	0
1	67	28	0	24	0	0	500	0
1	68	35	7	17	8000	320	250	5
1	69	35	0	24	0	0	250	5
1	70	35	7	17	8000	320	200	5
1	71	22	0	24	0	0	200	0
1	72	40	7	17	8000	320	90	5
1	73	30	7	17	8000	320	180	5
1	74	18	4	20	5000	200	200	8
1	75	40	4	20	5000	200	200	8
1	76	40	7	17	8000	320	200	5
1	77	26	7	17	8000	320	200	5
1	78	40	NA	NA	NA	NA	200	5
1	79	56	5	16	3000	90	12	5
1	80	50	5	16	3000	90	12	5
1	81	50	5	16	3000	90	12	5
1	82	32	5	16	3000	90	12	5
1	83	50	NA	NA	NA	NA	12	5
1	84	20	7.5	16.5	2000	80	125	30
1	85	35	7.5	16.5	2000	80	125	30
1	86	30	7.5	16.5	2000	80	125	30
1	87	24	7.5	16.5	2000	80	125	30
1	88	25	7.5	16.5	2000	80	140	30
1	89	18	7.5	16.5	2000	80	125	30
1	90	55	2	22	4000	60	300	15
1	91	29	2	22	4000	60	200	15
1	92	49	2	22	4000	60	200	15
1	93	49	2	22	4000	60	200	15
1	94	40	NA	NA	NA	NA	200	15
1	95	40	0	24	0	0	150	0
1	96	32	7	17	8000	240	120	5
1	97	28	7	17	8000	240	120	5
1	98	43	7	17	8000	240	120	5
1	99	28	7	17	8000	240	120	5
1	100	25	7	17	8000	240	100	5
1	101	40	6	18	0	0	65	5
1	102	5	6	18	3000	60	65	5
1	103	60	6	18	3000	60	65	5
1	104	40	6	18	3000	60	65	5
1	105	40	6	18	3000	60	65	5
1	106	30	1	23	30	10	75	10
1	107	15	1	23	10	25	75	10
1	108	53	1	23	10	25	75	10
1	109	50	1	23	10	25	75	10
1	110	5	1	23	NA	30	50	10
1	111	30	7	17	6000	120	100	20
1	112	35	7	17	6000	120	100	20
1	113	40	7	17	6000	120	100	20
1	114	38	7	17	6000	120	100	20
1	115	32	7	17	6000	120	100	20
1	116	30	4.5	0	3000	120	150	45
1	117	30	4.5	0	3000	120	150	45
1	118	30	4.5	0	3000	120	150	45
1	119	65	3.5	0	1000	180	150	100
1	120	40	3.5	0	1000	180	150	100
1	121	60	3.5	0	1000	180	150	100
1	122	60	3.5	0	1000	180	150	100
2	1	25	NA	NA	12000	120	150	30
2	2	28	7	17	12000	120	150	30
2	3	20	7	17	12000	120	150	30
2	4	28	7	17	12000	120	150	30
2	5	25	7	17	12000	120	150	30
2	6	18	7	17	12000	120	150	30
2	7	18	7	17	12000	120	150	30
2	8	18	7	17	12000	120	150	30
2	9	45	7	17	12000	120	150	30
2	10	22	7	17	12000	120	150	30
2	11	16	7	17	12000	120	150	30
2	12	25	7	17	12000	120	150	30
2	13	21	1	23	1000	40	210	30
2	14	29	0	23.5	1000	25	210	30
2	15	50	1	23	1000	40	210	30
2	16	30	1	23	1000	40	210	30
2	17	16	1	23	1000	40	210	30
2	18	22	1	23	1000	40	150	30
2	19	25	1	23	1000	40	150	30
2	20	22	NA	NA	NA	NA	150	30
2	21	30	1	23	1000	40	150	30
2	22	30	1	23	1000	40	150	30
2	23	30	1	23	1000	40	150	30
2	24	40	0	24	1000	40	150	0
2	25	30	1	23	1000	40	150	30
2	26	34	NA	NA	NA	NA	150	30
2	27	45	6	18	2500	100	182	10
2	28	47	6	18	2500	100	210	10
2	29	38	6	18	2500	100	182	10
2	30	41	0	24	0	0	140	0
2	31	40	6	18	2500	100	210	10
2	32	41	6	18	2500	100	140	10
2	33	37	6	18	2500	100	182	10
2	34	43	6	18	2500	100	140	10
2	35	37	6	18	2500	100	182	10
2	36	41	6	18	2500	100	140	10
2	37	40	6	18	2500	100	182	10
2	38	23	6	18	2500	100	182	10
2	39	20	6	18	3000	135	100	10
2	40	42	6	18	3000	135	100	10
2	41	20	6	18	3000	135	100	10
2	42	24	6	18	NA	120	100	10
2	43	28	6	18	NA	120	100	10
2	44	27	0	24	0	0	100	0
2	45	45	6	18	3000	135	100	10
2	46	40	6	18	3000	135	100	10
2	47	35	6	18	3000	135	100	10
2	48	42	6	18	3000	135	100	10
2	49	30	6	18	3000	135	100	10
2	50	20	6	18	3000	135	100	10
2	51	46	0	0	2000	30	165	20
2	52	33	5.5	0	2000	30	165	20
2	53	35	NA	0	NA	NA	165	20
2	54	41	5	0	3000	300	165	20
2	55	39	5	0	3000	300	165	20
2	56	30	5	0	3000	300	165	20
2	57	31	0	0	2000	20	165	20
2	58	34	5.5	0	2000	30	165	20
2	59	50	5.5	0	2000	30	165	20
2	60	29	NA	0	NA	NA	165	20
2	61	30	5	0	3000	300	165	20
2	62	40	NA	0	NA	NA	165	20
2	63	25	0	0	2000	20	165	20
2	64	35	5.5	0	2000	30	165	20
2	65	30	0	0	2000	20	165	20
2	66	40	0	24	0	0	250	0
2	67	28	7	17	NA	120	500	5
2	68	35	7	17	4000	160	250	5
2	69	35	7	17	4000	160	250	5
2	70	35	7	17	4000	160	200	5
2	71	22	7	17	4000	160	200	5
2	72	40	7	17	4000	160	90	5
2	73	30	7	17	4000	160	180	5
2	74	18	4	20	1500	60	200	8
2	75	40	0	24	0	0	200	0
2	76	40	7	17	4000	160	200	5
2	77	26	NA	NA	NA	NA	200	5
2	78	40	NA	NA	NA	NA	200	5
2	79	56	4.5	16.5	3000	90	12	5
2	80	50	4.5	16.5	3000	90	12	5
2	81	50	NA	NA	NA	NA	NA	NA
2	82	32	4.5	16.5	3000	90	12	5
2	83	50	4.5	16.5	3000	90	12	5
2	84	20	8	16	2000	80	125	30
2	85	35	8	16	2000	80	125	30
2	86	30	8	16	2000	80	125	30
2	87	24	8	16	2000	80	125	30
2	88	25	8	16	2000	80	140	30
2	89	18	8	16	2000	80	125	30
2	90	55	2	22	4000	60	300	15
2	91	29	2	22	4000	60	200	15
2	92	49	2	22	4000	60	200	15
2	93	49	2	22	4000	60	200	15
2	94	40	2	22	4000	60	200	15
2	95	40	9	15	12000	360	150	30
2	96	32	9	15	12000	360	120	5
2	97	28	9	15	12000	360	120	5
2	98	43	9	15	12000	360	120	5
2	99	28	NA	NA	NA	NA	120	5
2	100	25	9	15	12000	360	100	5
2	101	40	7	17	1000	20	65	5
2	102	5	NA	NA	NA	NA	65	5
2	103	60	7	17	1000	20	65	5
2	104	40	7	17	1000	20	65	5
2	105	40	7	17	1000	20	65	5
2	106	30	3	21	30	10	75	10
2	107	15	3	21	10	25	75	10
2	108	53	3	21	10	25	75	10
2	109	50	3	21	10	25	75	10
2	110	5	3	21	NA	30	50	10
2	111	30	6.5	17.5	6000	120	100	20
2	112	35	6.5	17.5	6000	120	100	20
2	113	40	6.5	17.5	6000	120	100	20
2	114	38	6.5	17.5	6000	120	100	20
2	115	32	6.5	17.5	6000	120	100	20
2	116	30	4.5	0	3000	120	150	45
2	117	30	4.5	0	3000	120	150	45
2	118	30	4.5	0	3000	120	150	45
2	119	65	3.5	0	1000	180	150	100
2	120	40	3.5	0	1000	180	150	100
2	121	60	3.5	0	1000	180	150	100
2	122	60	3.5	0	1000	180	150	100
3	1	25	8.5	15.5	12000	120	150	30
3	2	28	8.5	15.5	12000	120	150	30
3	3	20	8.5	15.5	12000	120	150	30
3	4	28	8.5	15.5	12000	120	150	30
3	5	25	8.5	15.5	12000	120	150	30
3	6	18	8.5	15.5	12000	120	150	30
3	7	18	8.5	15.5	12000	120	150	30
3	8	18	8.5	15.5	12000	120	150	30
3	9	45	8.5	15.5	12000	120	150	30
3	10	22	8.5	15.5	12000	120	150	30
3	11	16	8.5	15.5	12000	120	150	30
3	12	25	8.5	15.5	12000	120	150	30
3	13	21	4	20	2000	80	210	30
3	14	29	0	23.5	1000	25	210	30
3	15	50	4	20	2000	80	210	30
3	16	30	4	20	2000	80	210	30
3	17	16	4	20	2000	80	210	30
3	18	22	4	20	2000	80	150	30
3	19	25	4	20	2000	80	150	30
3	20	22	NA	NA	NA	NA	150	30
3	21	30	4	20	2000	80	150	30
3	22	30	4	20	2000	80	150	30
3	23	30	4	20	2000	80	150	30
3	24	40	NA	NA	NA	NA	150	30
3	25	30	4	20	2000	80	150	30
3	26	34	4	20	2000	80	150	30
3	27	45	7	17	3500	140	182	10
3	28	47	0	24	0	0	210	0
3	29	38	7	17	3500	140	182	10
3	30	41	7	17	3500	140	140	10
3	31	40	7	17	3500	140	210	10
3	32	41	7	17	3500	140	140	10
3	33	37	0	24	0	0	182	0
3	34	43	7	17	3500	140	140	10
3	35	37	7	17	3500	140	182	10
3	36	41	7	17	3500	140	140	10
3	37	40	7	17	3500	140	182	10
3	38	23	7	17	3500	140	182	10
3	39	20	6.5	17.5	3000	135	100	10
3	40	42	6.5	17.5	3000	135	100	10
3	41	20	6.5	17.5	3000	135	100	10
3	42	24	6.5	17.5	NA	160	100	10
3	43	28	6.5	17.5	NA	200	100	10
3	44	27	0	24	0	0	100	0
3	45	45	6.5	17.5	3000	135	100	10
3	46	40	6.5	17.5	3000	135	100	10
3	47	35	6.5	17.5	3000	135	100	10
3	48	42	6.5	17.5	3000	135	100	10
3	49	30	6.5	17.5	3000	135	100	10
3	50	20	6.5	17.5	3000	135	100	10
3	51	46	0	0	2000	30	165	20
3	52	33	5.5	0	2000	30	165	20
3	53	35	NA	0	NA	NA	165	20
3	54	41	5	0	3000	300	165	20
3	55	39	5	0	3000	300	165	20
3	56	30	NA	NA	NA	NA	NA	NA
3	57	31	0	0	2000	20	165	20
3	58	34	5.5	0	2000	30	165	20
3	59	50	5.5	0	2000	30	165	20
3	60	29	NA	0	NA	NA	165	20
3	61	30	5	0	3000	300	165	20
3	62	40	NA	0	NA	NA	165	20
3	63	25	0	0	2000	20	165	20
3	64	35	5.5	0	2000	30	165	20
3	65	30	0	0	2000	20	165	20
3	66	40	0	24	0	0	250	0
3	67	28	6.5	17.5	NA	120	500	5
3	68	35	6.5	17.5	6500	260	250	5
3	69	35	6.5	17.5	6500	260	250	5
3	70	35	3.5	20.5	5000	200	200	5
3	71	22	0	24	0	0	200	0
3	72	40	6.5	17.5	6500	260	90	5
3	73	30	6.5	17.5	6500	260	180	5
3	74	18	3.5	20.5	5000	200	200	8
3	75	40	2	22	3000	120	200	8
3	76	40	6.5	17.5	6500	260	200	5
3	77	26	6.5	17.5	6500	260	200	5
3	78	40	NA	NA	NA	NA	200	5
3	79	56	5	16	3000	90	12	5
3	80	50	5	16	3000	90	12	5
3	81	50	NA	NA	NA	NA	12	5
3	82	32	5	16	3000	90	12	5
3	83	50	0	21	3000	90	12	0
3	84	20	6	18	2000	80	125	30
3	85	35	6	18	2000	80	125	30
3	86	30	6	18	2000	80	125	30
3	87	24	6	18	2000	80	125	30
3	88	25	6	18	2000	80	140	30
3	89	18	6	18	2000	80	125	30
3	90	55	5	19	4000	60	300	15
3	91	29	5	19	4000	60	200	15
3	92	49	5	19	4000	60	200	15
3	93	49	5	19	4000	60	200	15
3	94	40	5	19	4000	60	200	15
3	95	40	9	15	8000	240	150	30
3	96	32	9	15	8000	240	120	5
3	97	28	9	15	8000	240	120	5
3	98	43	9	15	8000	240	120	5
3	99	28	NA	NA	NA	NA	120	5
3	100	25	9	15	8000	240	100	5
3	101	40	4.5	19.5	3000	60	65	5
3	102	5	4.5	19.5	3000	60	65	5
3	103	60	0	24	0	0	65	0
3	104	40	4.5	19.5	3000	60	65	5
3	105	40	4.5	19.5	3000	60	65	5
3	106	30	3	21	30	10	75	10
3	107	15	3	21	10	25	75	10
3	108	53	3	21	10	25	75	10
3	109	50	3	21	10	25	75	10
3	110	5	3	21	NA	30	50	10
3	111	30	6	18	6000	120	100	20
3	112	35	6	18	6000	120	100	20
3	113	40	6	18	6000	120	100	20
3	114	38	6	18	6000	120	100	20
3	115	32	6	18	6000	120	100	20
3	116	30	4.5	0	3000	120	150	45
3	117	30	4.5	0	3000	120	150	45
3	118	30	4.5	0	3000	120	150	45
3	119	65	3.5	0	1000	180	150	100
3	120	40	3.5	0	1000	180	150	100
3	121	60	3.5	0	1000	180	150	100
3	122	60	3.5	0	1000	180	150	100
4	1	25	7	17	12000	120	150	30
4	2	28	7	17	12000	120	150	30
4	3	20	7	17	12000	120	150	30
4	4	28	7	17	12000	120	150	30
4	5	25	7	17	12000	120	150	30
4	6	18	7	17	12000	120	150	30
4	7	18	7	17	12000	120	150	30
4	8	18	7	17	12000	120	150	30
4	9	45	7	17	12000	120	150	30
4	10	22	7	17	12000	120	150	30
4	11	16	7	17	12000	120	150	30
4	12	25	7	17	12000	120	150	30
4	13	21	4.5	19.5	2000	80	210	30
4	14	29	0	23.5	1000	25	210	30
4	15	50	0	24	0	0	210	0
4	16	30	4.5	19.5	2000	80	210	30
4	17	16	4.5	19.5	2000	80	210	30
4	18	22	4.5	19.5	2000	80	150	30
4	19	25	NA	NA	NA	NA	150	30
4	20	22	NA	NA	NA	NA	150	30
4	21	30	4.5	19.5	2000	80	150	30
4	22	30	4.5	19.5	2000	80	150	30
4	23	30	4.5	19.5	2000	80	150	30
4	24	40	NA	NA	NA	NA	150	30
4	25	30	4.5	19.5	2000	80	150	30
4	26	34	4.5	19.5	2000	80	150	30
4	27	45	7	17	3500	140	182	10
4	28	47	0	24	0	0	210	0
4	29	38	7	17	3500	140	182	10
4	30	41	7	17	3500	140	140	10
4	31	40	7	17	3500	140	210	10
4	32	41	7	17	3500	140	140	10
4	33	37	7	17	3500	140	182	10
4	34	43	7	17	3500	140	140	10
4	35	37	0	24	0	0	182	0
4	36	41	7	17	3500	140	140	10
4	37	40	7	17	3500	140	182	10
4	38	23	7	17	3500	140	182	10
4	39	20	7	17	5000	225	100	10
4	40	42	7	17	5000	225	100	10
4	41	20	4	20	5000	225	100	10
4	42	24	4	20	NA	120	100	10
4	43	28	4	20	NA	120	100	10
4	44	27	7	17	5000	225	100	10
4	45	45	7	17	5000	225	100	10
4	46	40	7	17	5000	225	100	10
4	47	35	7	17	5000	225	100	10
4	48	42	7	17	5000	225	100	10
4	49	30	7	17	5000	225	100	10
4	50	20	7	17	5000	225	100	10
4	51	46	0	0	2000	30	165	20
4	52	33	5.5	0	2000	30	165	20
4	53	35	NA	0	NA	NA	165	20
4	54	41	5	0	3000	300	165	20
4	55	39	5	0	3000	300	165	20
4	56	30	NA	NA	NA	NA	NA	NA
4	57	31	0	0	2000	20	165	20
4	58	34	5.5	0	2000	30	165	20
4	59	50	5.5	0	2000	30	165	20
4	60	29	NA	0	NA	NA	165	20
4	61	30	5	0	3000	300	165	20
4	62	40	NA	0	NA	NA	165	20
4	63	25	0	0	2000	20	165	20
4	64	35	5.5	0	2000	30	165	20
4	65	30	0	0	2000	20	165	20
4	66	40	6	18	3000	120	250	5
4	67	28	0	24	0	0	500	0
4	68	35	6	18	3000	120	250	5
4	69	35	6	18	3000	120	250	5
4	70	35	6	18	3000	120	200	5
4	71	22	6	18	3000	120	200	5
4	72	40	6	18	3000	120	90	5
4	73	30	6	18	3000	120	180	5
4	74	18	0	24	0	0	200	8
4	75	40	4	20	2000	80	200	8
4	76	40	6	18	3000	120	200	5
4	77	26	0	24	0	0	200	0
4	78	40	0	24	0	0	200	5
4	79	56	0	24	0	0	12	0
4	80	50	2.5	21.5	3000	90	12	5
4	81	50	NA	NA	NA	NA	NA	NA
4	82	32	2.5	21.5	3000	90	12	5
4	83	50	2.5	21.5	3000	90	12	5
4	84	20	7.5	16.5	2000	80	125	30
4	85	35	7.5	16.5	2000	80	125	30
4	86	30	7.5	16.5	2000	80	125	30
4	87	24	7.5	16.5	2000	80	125	30
4	88	25	7.5	16.5	2000	80	140	30
4	89	18	7.5	16.5	2000	80	125	30
4	90	55	NA	NA	NA	NA	NA	NA
4	91	29	5	19	4000	60	200	15
4	92	49	5	19	4000	60	200	15
4	93	49	5	19	4000	60	200	15
4	94	40	5	19	4000	60	200	15
4	95	40	3	21	4000	120	150	30
4	96	32	3	21	4000	120	120	5
4	97	28	3	21	4000	120	120	5
4	98	43	3	21	4000	120	120	5
4	99	28	NA	NA	NA	NA	120	5
4	100	25	3	21	4000	120	100	5
4	101	40	0	24	0	0	65	0
4	102	5	7	17	3000	60	65	5
4	103	60	7	17	3000	60	65	5
4	104	40	7	17	3000	60	65	5
4	105	40	7	17	3000	60	65	5
4	106	30	2	22	30	10	75	10
4	107	15	0	24	0	0	75	0
4	108	53	2	22	10	25	75	10
4	109	50	2	22	10	25	75	10
4	110	5	2	22	NA	30	50	10
4	111	30	6	18	6000	120	100	20
4	112	35	6	18	6000	120	100	20
4	113	40	6	18	6000	120	100	20
4	114	38	6	18	6000	120	100	20
4	115	32	6	18	6000	120	100	20
4	116	30	4.5	0	3000	20	150	45
4	117	30	4.5	0	3000	20	150	45
4	118	30	4.5	0	3000	20	150	45
4	119	65	3.5	0	1000	180	150	100
4	120	40	3.5	0	1000	180	150	100
4	121	60	3.5	0	1000	180	150	100
4	122	60	3.5	0	1000	180	150	100
5	1	25	5	19	12000	120	150	30
5	2	28	0	24	0	0	150	0
5	3	20	5	19	12000	120	150	30
5	4	28	5	19	12000	120	150	30
5	5	25	5	19	12000	120	150	30
5	6	18	5	19	12000	120	150	30
5	7	18	5	19	12000	120	150	30
5	8	18	5	19	12000	120	150	30
5	9	45	5	19	12000	120	150	30
5	10	22	5	19	12000	120	150	30
5	11	16	5	19	12000	120	150	30
5	12	25	5	19	12000	120	150	30
5	13	21	6	18	2000	80	210	30
5	14	29	0	23.5	1000	25	210	30
5	15	50	0	24	0	0	210	0
5	16	30	6	18	2000	80	210	30
5	17	16	6	18	2000	80	210	30
5	18	22	6	18	2000	80	150	30
5	19	25	NA	NA	2000	80	150	30
5	20	22	NA	NA	2000	80	150	30
5	21	30	6	18	2000	80	150	30
5	22	30	0	24	0	0	150	0
5	23	30	6	18	2000	80	150	30
5	24	40	NA	NA	2000	80	150	30
5	25	30	6	18	2000	80	150	30
5	26	34	6	18	2000	80	150	30
5	27	45	7.5	16.5	7000	280	182	10
5	28	47	7.5	16.5	7000	280	210	10
5	29	38	7.5	16.5	7000	280	182	10
5	30	41	0	24	0	0	140	0
5	31	40	7.5	16.5	7000	280	210	10
5	32	41	7.5	16.5	7000	280	140	10
5	33	37	7.5	16.5	7000	280	182	10
5	34	43	7.5	16.5	7000	280	140	10
5	35	37	0	24	0	0	182	0
5	36	41	7.5	16.5	7000	280	140	10
5	37	40	7.5	16.5	7000	280	182	10
5	38	23	0	24	0	0	182	0
5	39	20	7.5	16.5	7000	315	100	10
5	40	42	7.5	16.5	7000	315	100	10
5	41	20	5	19	7000	315	100	10
5	42	24	5	19	NA	120	100	10
5	43	28	5	19	NA	120	100	10
5	44	27	0	24	0	0	100	0
5	45	45	7.5	16.5	7000	315	100	10
5	46	40	7.5	16.5	7000	315	100	10
5	47	35	5	19	NA	120	100	10
5	48	42	7.5	16.5	7000	315	100	10
5	49	30	7.5	16.5	7000	315	100	10
5	50	20	7.5	16.5	7000	315	100	10
5	51	46	0	0	2000	30	165	20
5	52	33	5.5	0	2000	30	165	20
5	53	35	NA	0	NA	NA	165	20
5	54	41	5	0	3000	300	165	20
5	55	39	5	0	3000	300	165	20
5	56	30	NA	NA	NA	NA	NA	NA
5	57	31	0	0	2000	20	165	20
5	58	34	5.5	0	2000	30	165	20
5	59	50	5.5	0	2000	30	165	20
5	60	29	NA	0	NA	NA	165	20
5	61	30	5	0	3000	300	165	20
5	62	40	NA	0	NA	NA	165	20
5	63	25	0	0	2000	20	165	20
5	64	35	5.5	0	2000	30	165	20
5	65	30	0	0	2000	20	165	20
5	66	40	0	24	0	0	250	0
5	67	28	0	24	0	0	500	0
5	68	35	0	24	0	0	250	0
5	69	35	7	17	3000	120	250	5
5	70	35	7	17	3000	120	200	5
5	71	22	7	17	3000	120	200	5
5	72	40	7	17	3000	120	90	5
5	73	30	7	17	3000	120	180	5
5	74	18	0	24	0	0	200	8
5	75	40	7	17	3000	120	200	8
5	76	40	7	17	3000	120	200	5
5	77	26	7	17	3000	120	200	5
5	78	40	0	24	0	0	200	5
5	79	56	4	17	5000	150	12	5
5	80	50	4	17	5000	150	12	5
5	81	50	NA	NA	NA	NA	NA	NA
5	82	32	4	17	5000	150	12	5
5	83	50	7.5	13.5	1000	30	12	5
5	84	20	6	18	2000	80	125	30
5	85	35	6	18	2000	80	125	30
5	86	30	6	18	2000	80	125	30
5	87	24	6	18	2000	80	125	30
5	88	25	6	18	2000	80	140	30
5	89	18	6	18	2000	80	125	30
5	90	55	NA	NA	NA	NA	300	15
5	91	29	4.5	19.5	4000	60	200	15
5	92	49	4.5	19.5	4000	60	200	15
5	93	49	4.5	19.5	4000	60	200	15
5	94	40	4.5	19.5	4000	60	200	15
5	95	40	0	24	0	0	150	30
5	96	32	2	22	4000	120	120	5
5	97	28	2	22	4000	120	120	5
5	98	43	2	22	4000	120	120	5
5	99	28	NA	NA	NA	NA	120	5
5	100	25	2	22	4000	120	100	5
5	101	40	NA	NA	NA	NA	65	5
5	102	5	5	19	3000	60	65	5
5	103	60	0	24	0	0	65	0
5	104	40	5	19	3000	60	65	5
5	105	40	5	19	3000	60	65	5
5	106	30	0	24	0	0	75	0
5	107	15	3	21	10	25	75	10
5	108	53	3	21	10	25	75	10
5	109	50	3	21	10	25	75	10
5	110	5	3	21	NA	30	50	10
5	111	30	7	17	6000	120	100	20
5	112	35	7	17	6000	120	100	20
5	113	40	7	17	6000	120	100	20
5	114	38	7	17	6000	120	100	20
5	115	32	7	17	6000	120	100	20
5	116	30	4.5	0	3000	20	150	45
5	117	30	4.5	0	3000	20	150	45
5	118	30	4.5	0	3000	20	150	45
5	119	65	3.5	0	1000	180	150	100
5	120	40	3.5	0	1000	180	150	100
5	121	60	3.5	0	1000	180	150	100
5	122	60	3.5	0	1000	180	150	100
6	1	25	7	17	12000	120	150	30
6	2	28	0	24	12000	120	150	0
6	3	20	7	17	12000	120	150	30
6	4	28	0	24	0	0	150	0
6	5	25	7	17	12000	120	150	30
6	6	18	7	17	12000	120	150	30
6	7	18	7	17	12000	120	150	30
6	8	18	7	17	12000	120	150	30
6	9	45	7	17	12000	120	150	30
6	10	22	7	17	12000	120	150	30
6	11	16	7	17	12000	120	150	30
6	12	25	7	17	12000	120	150	30
6	13	21	4	20	2000	80	210	30
6	14	29	0	23.5	1000	25	210	30
6	15	50	0	24	0	0	210	0
6	16	30	0	24	0	0	210	0
6	17	16	4	20	2000	80	210	30
6	18	22	4	20	2000	80	150	30
6	19	25	NA	NA	NA	NA	150	30
6	20	22	NA	NA	NA	NA	150	30
6	21	30	4	20	2000	80	150	30
6	22	30	4	20	2000	80	150	30
6	23	30	4	20	2000	80	150	30
6	24	40	4	20	NA	NA	150	30
6	25	30	4	20	2000	80	150	30
6	26	34	4	20	2000	80	150	30
6	27	45	7	17	2500	100	182	10
6	28	47	7	17	2500	100	210	10
6	29	38	7	17	2500	100	182	10
6	30	41	0	24	0	0	140	0
6	31	40	7	17	2500	100	210	10
6	32	41	7	17	2500	100	140	10
6	33	37	7	17	2500	100	182	10
6	34	43	7	17	2500	100	140	10
6	35	37	7	17	2500	100	182	10
6	36	41	7	17	2500	100	140	10
6	37	40	7	17	2500	100	182	10
6	38	23	0	24	0	0	182	0
6	39	20	5.5	18.5	4000	180	100	10
6	40	42	NA	NA	NA	NA	NA	NA
6	41	20	4	20	4000	180	100	10
6	42	24	4	20	NA	120	100	10
6	43	28	4	20	NA	120	100	10
6	44	27	5.5	18.5	4000	180	100	10
6	45	45	5.5	18.5	4000	180	100	10
6	46	40	5.5	18.5	4000	180	100	10
6	47	35	0	24	0	0	100	0
6	48	42	0	24	0	0	100	0
6	49	30	5.5	18.5	4000	180	100	10
6	50	20	5.5	18.5	4000	180	100	10
6	51	46	0	0	2000	30	165	20
6	52	33	5.5	0	2000	30	165	20
6	53	35	NA	0	NA	NA	165	20
6	54	41	5	0	3000	300	165	20
6	55	39	0	0	2000	20	165	20
6	56	30	NA	NA	NA	NA	NA	NA
6	57	31	0	0	2000	20	165	20
6	58	34	5.5	0	2000	30	165	20
6	59	50	5.5	0	2000	30	165	20
6	60	29	NA	0	NA	NA	165	20
6	61	30	0	0	2000	20	165	20
6	62	40	NA	0	NA	NA	165	20
6	63	25	0	0	2000	20	165	20
6	64	35	5.5	0	2000	30	165	20
6	65	30	0	0	2000	20	165	20
6	66	40	7	17	2000	80	250	5
6	67	28	7	17	NA	120	500	5
6	68	35	7	17	2000	80	250	5
6	69	35	7	17	2000	80	250	5
6	70	35	7	17	2000	80	200	5
6	71	22	7	17	2000	80	200	5
6	72	40	7	17	2000	80	90	5
6	73	30	7	17	2000	80	180	5
6	74	18	0	24	0	0	200	8
6	75	40	4	20	1000	40	200	8
6	76	40	7	17	2000	80	200	5
6	77	26	7	17	2000	80	200	5
6	78	40	4	20	1000	40	200	5
6	79	56	2	22	3000	90	12	5
6	80	50	2	22	3000	90	12	5
6	81	50	NA	NA	NA	NA	NA	NA
6	82	32	2	22	3000	90	12	5
6	83	50	2	22	3000	90	12	5
6	84	20	6	18	2000	80	125	30
6	85	35	6	18	2000	80	125	30
6	86	30	6	18	2000	80	125	30
6	87	24	6	18	2000	80	125	30
6	88	25	6	18	2000	80	140	30
6	89	18	6	18	2000	80	125	30
6	90	55	NA	NA	NA	NA	300	15
6	91	29	4.5	19.5	4000	60	200	15
6	92	49	4.5	19.5	4000	60	200	15
6	93	49	4.5	19.5	4000	60	200	15
6	94	40	4.5	19.5	4000	60	200	15
6	95	40	0	24	0	0	150	0
6	96	32	NA	NA	NA	NA	NA	NA
6	97	28	2	22	4000	120	120	5
6	98	43	2	22	4000	120	120	5
6	99	28	NA	NA	NA	NA	120	5
6	100	25	2	22	4000	120	100	5
6	101	40	NA	NA	NA	NA	65	5
6	102	5	7.5	16.5	3000	60	65	5
6	103	60	NA	NA	NA	NA	NA	NA
6	104	40	7.5	16.5	3000	60	65	5
6	105	40	7.5	16.5	3000	60	65	5
6	106	30	0	24	0	0	75	0
6	107	15	3	21	10	25	75	10
6	108	53	3	21	10	25	75	10
6	109	50	3	21	10	25	75	10
6	110	5	3	21	NA	30	50	10
6	111	30	5	19	6000	120	100	20
6	112	35	5	19	0	0	100	20
6	113	40	5	19	6000	120	100	20
6	114	38	5	19	6000	120	100	20
6	115	32	0	24	0	0	100	0
6	116	30	4.5	0	3000	20	150	45
6	117	30	4.5	0	3000	20	150	45
6	118	30	4.5	0	3000	20	150	45
6	119	65	3.5	0	1000	180	150	100
6	120	40	3.5	0	1000	180	150	100
6	121	60	3.5	0	1000	180	150	100
6	122	60	3.5	0	1000	180	150	100

## Sheet: Table 5
		Original Score			Score after converting for analysis and removing musth and gestation data
Time of examination	Elephant ID	Body Condition Score	Foot Score	Wound Score	Body Condition Score	Foot Score	Wound Score
1	1	3	1	0	3	2	2
1	2	4	1	0	2	2	2
1	3	3	1	0	3	2	2
1	4	4	2	2	2	1	0
1	5	3	2	2	3	1	0
1	6	3	2	2	3	1	0
1	7	4	2	0	2	1	2
1	8	4	0	0	2	3	2
1	9	4	1	2	2	2	0
1	10	4	2	0	2	1	2
1	11	4	1	0	2	2	2
1	12	NA	NA	NA	NA	NA	NA
1	13	4	1	0	2	2	2
1	14	3	2	0	3	1	2
1	15	4	0	0	2	3	2
1	16	4	1	0	2	2	2
1	17	4	1	0	2	2	2
1	18	4	0	0	2	3	2
1	19	4	1	0	2	2	2
1	20	3	1	0	3	2	2
1	21	4	0	0	2	3	2
1	22	4	2	0	2	1	2
1	23	4	1	0	2	2	2
1	24	4	3	1	2	0	1
1	25	NA	NA	NA	NA	NA	NA
1	26	NA	NA	NA	NA	NA	NA
1	27	3	1	0	3	2	2
1	28	3	2	1	3	1	1
1	29	4	2	2	2	1	0
1	30	3	2	1	3	1	1
1	31	3	1	1	3	2	1
1	32	3	1	1	3	2	1
1	33	5	0	1	1	3	1
1	34	4	1	1	2	2	1
1	35	5	2	1	1	1	1
1	36	4	2	0	2	1	2
1	37	4	1	1	2	2	1
1	38	3	1	1	3	2	1
1	39	4	0	1	2	3	1
1	40	3	1	1	3	2	1
1	41	3	0	1	3	2	1
1	42	NA	NA	NA	NA	NA	NA
1	43	3	2	0	3	1	2
1	44	3	1	2	3	2	0
1	45	NA	NA	NA	NA	NA	NA
1	46	4	1	0	2	2	2
1	47	NA	NA	NA	NA	NA	NA
1	48	4	0	0	2	3	2
1	49	3	2	0	3	1	2
1	50	4	1	0	2	2	2
1	51	5	1	0	1	2	2
1	52	5	3	0	1	0	2
1	53	4	1	0	2	2	2
1	54	5	0	0	1	3	2
1	55	3	1	0	3	2	2
1	56	4	0	0	2	3	2
1	57	5	0	0	1	3	2
1	58	5	0	0	1	3	2
1	59	5	1	0	1	2	2
1	60	4	1	0	2	2	2
1	61	5	0	0	1	3	2
1	62	5	0	0	1	3	2
1	63	NA	NA	NA	NA	NA	NA
1	64	NA	NA	NA	NA	NA	NA
1	65	NA	NA	NA	NA	NA	NA
1	66	2	0	2	4	3	0
1	67	NA	NA	NA	NA	NA	NA
1	68	3	0	1	3	3	1
1	69	4	0	1	2	3	1
1	70	4	0	0	2	3	2
1	71	NA	NA	NA	NA	NA	NA
1	72	4	1	0	2	2	2
1	73	4	2	1	2	1	1
1	74	5	0	0	NA	NA	NA
1	75	4	1	1	2	2	1
1	76	4	2	1	2	1	1
1	77	4	0	0	2	3	2
1	78	NA	NA	NA	NA	NA	NA
1	79	4	2	0	2	1	2
1	80	3	2	1	3	1	1
1	81	3	1	1	3	2	1
1	82	4	1	2	2	2	0
1	83	NA	NA	NA	NA	NA	NA
1	84	4	1	1	2	2	1
1	85	5	2	0	1	1	2
1	86	5	2	0	1	1	2
1	87	5	0	0	1	3	2
1	88	4	0	0	2	3	2
1	89	5	0	0	1	3	2
1	90	3	2	1	3	1	1
1	91	4	2	0	2	1	2
1	92	4	2	2	2	1	0
1	93	5	2	0	1	1	2
1	94	NA	NA	NA	NA	NA	NA
1	95	4	1	0	NA	NA	NA
1	96	4	2	0	2	1	2
1	97	4	1	0	2	2	2
1	98	4	1	0	2	2	2
1	99	4	0	0	2	3	2
1	100	4	0	0	2	3	2
1	101	3	1	0	3	2	2
1	102	4	0	0	2	3	2
1	103	2	1	0	4	2	2
1	104	5	0	0	1	3	2
1	105	3	1	1	3	2	1
1	106	3	0	0	3	3	2
1	107	3	0	1	3	3	1
1	108	3	1	1	3	2	1
1	109	4	0	1	2	3	1
1	110	3	0	0	3	3	2
1	111	4	0	0	2	3	2
1	112	4	0	0	2	3	2
1	113	5	2	0	1	1	2
1	114	4	0	0	2	3	2
1	115	4	0	0	2	3	2
1	116	3	2	0	3	1	2
1	117	4	0	1	2	3	1
1	118	5	2	0	1	1	2
1	119	4	1	0	2	2	2
1	120	5	2	0	1	1	2
1	121	3	1	0	3	2	2
1	122	5	1	0	1	2	2
2	1	NA	NA	NA	NA	NA	NA
2	2	4	1	1	2	2	1
2	3	3	2	1	3	1	1
2	4	4	1	0	2	2	2
2	5	3	1	2	3	2	0
2	6	3	2	0	3	1	2
2	7	4	1	0	2	2	2
2	8	5	0	2	1	3	0
2	9	4	0	2	2	3	0
2	10	4	2	0	2	1	2
2	11	4	2	0	2	1	2
2	12	3	1	0	3	2	2
2	13	4	0	0	2	3	2
2	14	4	1	0	2	2	2
2	15	4	0	0	2	3	2
2	16	4	1	0	2	2	2
2	17	4	1	1	2	2	1
2	18	4	0	0	2	3	2
2	19	4	1	0	2	2	2
2	20	NA	NA	NA	NA	NA	NA
2	21	4	0	0	2	3	2
2	22	4	2	0	2	1	2
2	23	5	1	0	1	2	2
2	24	4	0	2	2	3	0
2	25	4	1	1	2	2	1
2	26	NA	NA	NA	NA	NA	NA
2	27	3	0	0	3	3	2
2	28	3	1	1	3	2	1
2	29	4	2	1	2	1	1
2	30	3	2	0	NA	NA	NA
2	31	2	2	1	4	1	1
2	32	3	1	1	3	2	1
2	33	5	1	0	1	2	2
2	34	4	1	0	2	2	2
2	35	5	2	1	1	1	1
2	36	4	0	0	2	3	2
2	37	4	1	0	2	2	2
2	38	4	0	2	2	3	0
2	39	4	1	1	2	2	1
2	40	3	2	0	3	1	2
2	41	2	0	0	4	3	2
2	42	3	0	0	3	3	2
2	43	3	2	0	3	1	2
2	44	NA	NA	NA	NA	NA	NA
2	45	3	0	0	3	3	2
2	46	4	1	0	2	2	2
2	47	3	1	1	3	2	1
2	48	4	1	0	2	2	2
2	49	3	1	0	3	2	2
2	50	4	1	0	2	2	2
2	51	5	1	0	1	2	2
2	52	5	0	0	1	3	2
2	53	NA	NA	NA	NA	NA	NA
2	54	5	0	0	1	3	2
2	55	3	1	0	3	2	2
2	56	4	0	0	2	3	2
2	57	5	2	0	1	1	2
2	58	5	0	0	1	3	2
2	59	5	1	0	1	2	2
2	60	NA	NA	NA	NA	NA	NA
2	61	5	0	0	1	3	2
2	62	NA	NA	NA	NA	NA	NA
2	63	5	2	0	1	1	2
2	64	5	2	0	1	1	2
2	65	5	1	0	1	2	2
2	66	2	0	1	4	3	1
2	67	4	2	0	2	1	2
2	68	3	0	0	3	3	2
2	69	4	0	0	2	3	2
2	70	4	1	1	2	2	1
2	71	3	0	0	3	3	2
2	72	4	2	0	2	1	2
2	73	3	1	1	3	2	1
2	74	4	0	0	NA	NA	NA
2	75	4	0	1	2	3	1
2	76	4	2	1	2	1	1
2	77	NA	NA	NA	NA	NA	NA
2	78	NA	NA	NA	NA	NA	NA
2	79	4	2	0	2	1	2
2	80	3	3	0	3	0	2
2	81	NA	NA	NA	NA	NA	NA
2	82	4	0	1	2	3	1
2	83	2	1	1	4	2	1
2	84	4	1	0	2	2	2
2	85	5	2	1	1	1	1
2	86	5	1	0	1	2	2
2	87	4	1	2	2	2	0
2	88	4	1	0	2	2	2
2	89	5	0	0	1	3	2
2	90	3	1	0	3	2	2
2	91	4	0	0	2	3	2
2	92	4	0	0	2	3	2
2	93	5	2	0	1	1	2
2	94	5	0	0	1	3	2
2	95	4	3	2	2	0	0
2	96	4	2	0	2	1	2
2	97	4	0	0	2	3	2
2	98	4	0	0	2	3	2
2	99	NA	NA	NA	NA	NA	NA
2	100	4	0	0	2	3	2
2	101	3	1	0	3	2	2
2	102	NA	NA	NA	NA	NA	NA
2	103	2	0	0	4	3	2
2	104	5	0	0	1	3	2
2	105	4	1	0	2	2	2
2	106	3	0	0	3	3	2
2	107	3	0	0	3	3	2
2	108	3	1	1	3	2	1
2	109	4	0	0	2	3	2
2	110	3	0	1	3	3	1
2	111	4	0	0	2	3	2
2	112	4	0	0	2	3	2
2	113	4	1	0	2	2	2
2	114	3	3	1	3	0	1
2	115	4	0	0	2	3	2
2	116	3	2	0	3	1	2
2	117	4	2	0	2	1	2
2	118	5	3	0	1	0	2
2	119	4	1	0	2	2	2
2	120	5	0	0	1	3	2
2	121	3	1	0	3	2	2
2	122	5	0	1	1	3	1
3	1	3	1	0	3	2	2
3	2	4	2	0	2	1	2
3	3	4	1	1	2	2	1
3	4	4	1	0	2	2	2
3	5	3	1	0	3	2	2
3	6	3	2	0	3	1	2
3	7	4	1	0	2	2	2
3	8	4	0	0	2	3	2
3	9	5	2	2	1	1	0
3	10	3	2	0	3	1	2
3	11	5	1	0	1	2	2
3	12	4	2	0	2	1	2
3	13	4	0	0	2	3	2
3	14	4	1	0	2	2	2
3	15	4	2	0	2	1	2
3	16	4	1	0	2	2	2
3	17	4	1	0	2	2	2
3	18	4	1	0	2	2	2
3	19	4	1	0	2	2	2
3	20	NA	NA	NA	NA	NA	NA
3	21	4	0	0	2	3	2
3	22	4	1	0	2	2	2
3	23	5	1	0	1	2	2
3	24	NA	NA	NA	NA	NA	NA
3	25	4	1	0	2	2	2
3	26	5	2	0	1	1	2
3	27	2	1	0	4	2	2
3	28	3	1	0	3	2	2
3	29	4	1	0	2	2	2
3	30	2	2	1	4	1	1
3	31	3	2	1	3	1	1
3	32	3	3	1	3	0	1
3	33	5	1	1	1	2	1
3	34	5	0	0	1	3	2
3	35	4	1	0	2	2	2
3	36	4	1	0	2	2	2
3	37	4	1	0	2	2	2
3	38	4	1	0	2	2	2
3	39	4	0	0	2	3	2
3	40	2	1	1	4	2	1
3	41	3	0	1	3	3	1
3	42	3	1	0	3	2	2
3	43	3	2	0	3	1	2
3	44	2	1	2	4	2	0
3	45	3	0	0	3	3	2
3	46	4	1	0	2	2	2
3	47	3	1	0	3	2	2
3	48	4	0	0	2	3	2
3	49	2	0	0	4	3	2
3	50	4	2	0	2	1	2
3	51	5	1	0	1	2	2
3	52	5	1	0	1	2	2
3	53	NA	NA	NA	NA	NA	NA
3	54	5	0	2	1	3	0
3	55	3	1	0	3	2	2
3	56	NA	NA	NA	NA	NA	NA
3	57	5	2	0	1	1	2
3	58	5	0	0	1	3	2
3	59	5	1	0	1	2	2
3	60	NA	NA	NA	NA	NA	NA
3	61	5	0	0	1	3	2
3	62	NA	NA	NA	NA	NA	NA
3	63	5	0	0	1	3	2
3	64	5	2	0	1	1	2
3	65	5	0	0	1	3	2
3	66	2	1	1	4	2	1
3	67	4	1	0	2	2	2
3	68	3	1	0	3	2	2
3	69	3	0	1	3	3	1
3	70	5	1	0	NA	NA	NA
3	71	3	1	0	3	2	2
3	72	4	0	0	2	3	2
3	73	3	0	0	3	3	2
3	74	3	0	0	NA	NA	NA
3	75	4	0	0	2	3	2
3	76	5	2	1	1	1	1
3	77	4	0	1	2	3	1
3	78	NA	NA	NA	NA	NA	NA
3	79	4	1	0	2	2	2
3	80	3	3	0	3	0	2
3	81	NA	NA	NA	NA	NA	NA
3	82	4	0	1	2	3	1
3	83	2	1	1	4	2	1
3	84	4	1	1	2	2	1
3	85	5	2	1	1	1	1
3	86	5	1	0	1	2	2
3	87	4	0	0	2	3	2
3	88	4	1	0	2	2	2
3	89	5	1	0	1	2	2
3	90	2	0	0	4	3	2
3	91	4	1	0	2	2	2
3	92	4	1	0	2	2	2
3	93	5	2	0	1	1	2
3	94	5	0	0	1	3	2
3	95	4	1	1	2	2	1
3	96	4	1	0	2	2	2
3	97	4	0	0	2	3	2
3	98	4	0	0	2	3	2
3	99	NA	NA	NA	NA	NA	NA
3	100	4	1	0	2	2	2
3	101	3	1	2	3	2	0
3	102	4	0	0	2	3	2
3	103	2	0	0	4	3	2
3	104	4	0	0	2	3	2
3	105	3	2	0	3	1	2
3	106	3	0	0	3	3	2
3	107	3	0	0	3	3	2
3	108	3	1	0	3	2	2
3	109	4	0	2	2	3	0
3	110	3	0	0	3	3	2
3	111	4	0	0	2	3	2
3	112	4	0	0	2	3	2
3	113	5	0	0	1	3	2
3	114	3	2	1	3	1	1
3	115	4	0	0	2	3	2
3	116	3	1	0	3	2	2
3	117	4	0	0	2	3	2
3	118	5	1	0	1	2	2
3	119	3	1	0	3	2	2
3	120	5	0	0	1	3	2
3	121	3	2	0	3	1	2
3	122	5	0	0	1	3	2
4	1	3	1	0	3	2	2
4	2	3	2	0	3	1	2
4	3	3	0	0	3	3	2
4	4	3	0	0	3	3	2
4	5	3	2	0	3	1	2
4	6	3	0	1	3	3	1
4	7	3	1	0	3	2	2
4	8	4	1	0	2	2	2
4	9	4	0	0	2	3	2
4	10	2	1	0	4	2	2
4	11	3	0	0	3	3	2
4	12	2	2	0	4	1	2
4	13	4	0	0	2	3	2
4	14	3	0	0	3	3	2
4	15	3	2	0	NA	NA	NA
4	16	4	1	0	2	2	2
4	17	4	1	0	2	2	2
4	18	5	1	0	1	2	2
4	19	NA	NA	NA	NA	NA	NA
4	20	NA	NA	NA	NA	NA	NA
4	21	4	0	1	2	3	1
4	22	4	1	1	2	2	1
4	23	5	1	0	1	2	2
4	24	NA	NA	NA	NA	NA	NA
4	25	4	1	0	2	2	2
4	26	5	1	1	1	2	1
4	27	2	1	0	4	2	2
4	28	2	1	0	NA	NA	NA
4	29	3	2	0	3	1	2
4	30	3	1	1	3	2	1
4	31	3	1	1	3	2	1
4	32	3	1	1	3	2	1
4	33	5	1	0	1	2	2
4	34	5	0	1	1	3	1
4	35	5	1	1	1	2	1
4	36	4	1	1	2	2	1
4	37	4	1	0	2	2	2
4	38	3	1	2	3	2	0
4	39	4	0	0	2	3	2
4	40	2	0	0	4	3	2
4	41	3	0	1	3	3	1
4	42	3	0	0	3	3	2
4	43	3	1	0	3	2	2
4	44	2	0	0	4	3	2
4	45	4	0	0	2	3	2
4	46	5	1	0	1	2	2
4	47	3	1	2	3	2	0
4	48	4	0	0	2	3	2
4	49	3	0	0	3	3	2
4	50	4	0	0	2	3	2
4	51	5	1	0	1	2	2
4	52	5	0	0	1	3	2
4	53	NA	NA	NA	NA	NA	NA
4	54	5	0	0	1	3	2
4	55	3	1	0	3	2	2
4	56	NA	NA	NA	NA	NA	NA
4	57	5	0	0	1	3	2
4	58	5	0	0	1	3	2
4	59	5	1	0	1	2	2
4	60	NA	NA	NA	NA	NA	NA
4	61	5	0	0	1	3	2
4	62	NA	NA	NA	NA	NA	NA
4	63	5	0	0	1	3	2
4	64	5	1	0	1	2	2
4	65	5	0	0	1	3	2
4	66	3	0	1	3	3	1
4	67	NA	NA	NA	NA	NA	NA
4	68	4	0	0	2	3	2
4	69	4	0	0	2	3	2
4	70	5	1	1	1	2	1
4	71	4	0	0	2	3	2
4	72	4	1	1	2	2	1
4	73	3	1	0	3	2	2
4	74	4	0	0	NA	NA	NA
4	75	3	0	0	3	3	2
4	76	5	1	0	1	2	2
4	77	4	0	1	2	3	1
4	78	NA	NA	NA	NA	NA	NA
4	79	NA	NA	NA	NA	NA	NA
4	80	3	1	0	3	2	2
4	81	NA	NA	NA	NA	NA	NA
4	82	4	1	0	2	2	2
4	83	3	1	0	3	2	2
4	84	4	1	0	2	2	2
4	85	5	2	0	1	1	2
4	86	5	0	0	1	3	2
4	87	5	0	0	1	3	2
4	88	4	2	0	2	1	2
4	89	5	0	0	1	3	2
4	90	NA	NA	NA	NA	NA	NA
4	91	5	1	0	1	2	2
4	92	5	0	0	1	3	2
4	93	4	1	0	2	2	2
4	94	4	0	0	2	3	2
4	95	5	1	0	1	2	2
4	96	5	1	0	1	2	2
4	97	4	0	0	2	3	2
4	98	4	1	0	2	2	2
4	99	NA	NA	NA	NA	NA	NA
4	100	4	0	0	2	3	2
4	101	NA	NA	NA	NA	NA	NA
4	102	4	0	0	2	3	2
4	103	2	0	2	4	3	0
4	104	5	1	0	1	2	2
4	105	4	1	0	2	2	2
4	106	3	3	0	3	0	2
4	107	3	0	0	3	3	2
4	108	3	1	0	3	2	2
4	109	4	0	0	2	3	2
4	110	4	0	0	2	3	2
4	111	4	0	0	2	3	2
4	112	5	0	0	1	3	2
4	113	5	0	0	1	3	2
4	114	3	1	0	3	2	2
4	115	4	0	0	2	3	2
4	116	3	1	0	3	2	2
4	117	4	0	0	2	3	2
4	118	5	1	0	1	2	2
4	119	3	1	0	3	2	2
4	120	5	0	0	1	3	2
4	121	3	1	0	3	2	2
4	122	5	0	0	1	3	2
5	1	3	1	0	3	2	2
5	2	4	0	0	2	3	2
5	3	3	2	0	3	1	2
5	4	2	1	0	4	2	2
5	5	3	2	0	3	1	2
5	6	3	2	0	3	1	2
5	7	3	1	0	3	2	2
5	8	4	0	0	2	3	2
5	9	4	0	0	2	3	2
5	10	2	1	0	4	2	2
5	11	3	0	0	3	3	2
5	12	3	2	0	3	1	2
5	13	4	0	1	2	3	1
5	14	4	2	0	2	1	2
5	15	2	2	0	NA	NA	NA
5	16	5	2	0	1	1	2
5	17	4	1	0	2	2	2
5	18	5	1	0	1	2	2
5	19	NA	NA	NA	NA	NA	NA
5	20	NA	NA	NA	NA	NA	NA
5	21	4	1	0	2	2	2
5	22	4	1	2	2	2	0
5	23	5	1	0	1	2	2
5	24	NA	NA	NA	NA	NA	NA
5	25	3	1	0	3	2	2
5	26	5	2	0	1	1	2
5	27	3	1	0	3	2	2
5	28	3	1	0	3	2	2
5	29	4	1	0	2	2	2
5	30	2	1	2	4	2	0
5	31	3	1	1	3	2	1
5	32	2	2	0	4	1	2
5	33	5	1	0	1	2	2
5	34	5	0	1	1	3	1
5	35	5	1	0	1	2	2
5	36	5	3	0	1	0	2
5	37	4	1	0	2	2	2
5	38	4	1	2	2	2	0
5	39	4	2	0	2	1	2
5	40	3	2	0	3	1	2
5	41	3	0	0	3	3	2
5	42	3	1	2	3	2	0
5	43	3	2	0	3	1	2
5	44	2	1	2	4	2	0
5	45	4	1	0	2	2	2
5	46	4	2	1	2	1	1
5	47	4	2	0	2	1	2
5	48	4	0	1	2	3	1
5	49	3	0	0	3	3	2
5	50	5	1	0	1	2	2
5	51	5	1	0	1	2	2
5	52	5	1	0	1	2	2
5	53	NA	NA	NA	NA	NA	NA
5	54	5	0	0	1	3	2
5	55	4	1	0	2	2	2
5	56	NA	NA	NA	NA	NA	NA
5	57	5	2	0	1	1	2
5	58	5	0	0	1	3	2
5	59	5	1	0	1	2	2
5	60	NA	NA	NA	NA	NA	NA
5	61	5	1	0	1	2	2
5	62	NA	NA	NA	NA	NA	NA
5	63	5	0	0	1	3	2
5	64	5	0	0	1	3	2
5	65	5	1	0	1	2	2
5	66	3	0	1	3	3	1
5	67	NA	NA	NA	NA	NA	NA
5	68	NA	NA	NA	NA	NA	NA
5	69	4	0	1	2	3	1
5	70	5	1	1	1	2	1
5	71	4	0	0	2	3	2
5	72	4	1	1	2	2	1
5	73	4	1	0	2	2	2
5	74	4	0	0	NA	NA	NA
5	75	3	0	0	3	3	2
5	76	4	2	0	2	1	2
5	77	5	0	0	1	3	2
5	78	3	1	1	3	2	1
5	79	4	0	0	2	3	2
5	80	4	1	1	2	2	1
5	81	NA	NA	NA	NA	NA	NA
5	82	4	1	0	2	2	2
5	83	2	1	1	4	2	1
5	84	4	1	0	2	2	2
5	85	5	1	0	1	2	2
5	86	5	0	0	1	3	2
5	87	4	0	0	2	3	2
5	88	4	1	0	2	2	2
5	89	5	1	0	1	2	2
5	90	NA	NA	NA	NA	NA	NA
5	91	5	1	0	1	2	2
5	92	5	0	0	1	3	2
5	93	5	2	0	1	1	2
5	94	4	0	0	2	3	2
5	95	4	1	0	2	2	2
5	96	5	2	0	1	1	2
5	97	4	0	0	2	3	2
5	98	4	1	0	2	2	2
5	99	NA	NA	NA	NA	NA	NA
5	100	3	0	0	3	3	2
5	101	NA	NA	NA	NA	NA	NA
5	102	4	0	0	2	3	2
5	103	3	0	2	3	3	0
5	104	5	1	0	1	2	2
5	105	5	1	0	1	2	2
5	106	3	1	0	3	2	2
5	107	4	0	1	2	3	1
5	108	3	1	0	3	2	2
5	109	3	2	1	3	1	1
5	110	3	0	0	3	3	2
5	111	5	0	0	1	3	2
5	112	5	1	0	1	2	2
5	113	5	1	2	1	2	0
5	114	3	1	0	3	2	2
5	115	4	0	0	2	3	2
5	116	3	2	0	3	1	2
5	117	3	0	0	3	3	2
5	118	5	1	0	1	2	2
5	119	4	1	0	2	2	2
5	120	5	2	0	1	1	2
5	121	3	1	0	3	2	2
5	122	5	1	0	1	2	2
6	1	4	1	0	2	2	2
6	2	3	2	2	3	1	0
6	3	3	2	0	3	1	2
6	4	2	1	0	4	2	2
6	5	3	2	0	3	1	2
6	6	4	2	0	2	1	2
6	7	5	1	0	1	2	2
6	8	5	1	0	1	2	2
6	9	5	0	0	1	3	2
6	10	3	2	0	3	1	2
6	11	3	1	0	3	2	2
6	12	3	1	0	3	2	2
6	13	5	0	0	1	3	2
6	14	5	1	0	1	2	2
6	15	2	0	0	NA	NA	NA
6	16	4	1	0	NA	NA	NA
6	17	4	1	0	2	2	2
6	18	5	1	0	1	2	2
6	19	NA	NA	NA	NA	NA	NA
6	20	NA	NA	NA	NA	NA	NA
6	21	5	0	1	1	3	1
6	22	4	1	1	2	2	1
6	23	5	2	0	1	1	2
6	24	NA	NA	NA	NA	NA	NA
6	25	4	1	0	2	2	2
6	26	5	2	0	1	1	2
6	27	4	1	0	2	2	2
6	28	4	1	1	2	2	1
6	29	4	1	1	2	2	1
6	30	2	1	2	4	2	0
6	31	3	2	0	3	1	2
6	32	3	1	0	3	2	2
6	33	5	1	0	1	2	2
6	34	5	3	0	1	0	2
6	35	5	2	1	1	1	1
6	36	5	1	1	1	2	1
6	37	4	1	1	2	2	1
6	38	4	1	2	2	2	0
6	39	3	1	0	3	2	2
6	40	NA	NA	NA	NA	NA	NA
6	41	4	0	0	2	3	2
6	42	3	0	0	3	3	2
6	43	4	2	0	2	1	2
6	44	3	1	1	3	2	1
6	45	5	1	0	1	2	2
6	46	4	1	0	2	2	2
6	47	3	1	0	3	2	2
6	48	4	0	1	2	3	1
6	49	3	1	0	3	2	2
6	50	5	1	0	1	2	2
6	51	5	1	0	1	2	2
6	52	5	0	0	1	3	2
6	53	NA	NA	NA	NA	NA	NA
6	54	5	0	0	1	3	2
6	55	5	1	0	1	2	2
6	56	NA	NA	NA	NA	NA	NA
6	57	5	2	0	1	1	2
6	58	5	1	0	1	2	2
6	59	5	1	0	1	2	2
6	60	NA	NA	NA	NA	NA	NA
6	61	5	0	0	1	3	2
6	62	NA	NA	NA	NA	NA	NA
6	63	5	0	0	1	3	2
6	64	5	3	0	1	0	2
6	65	5	2	0	1	1	2
6	66	NA	NA	NA	NA	NA	NA
6	67	4	2	0	2	1	2
6	68	4	0	0	2	3	2
6	69	4	0	0	2	3	2
6	70	5	2	0	1	1	2
6	71	4	1	0	2	2	2
6	72	5	0	0	1	3	2
6	73	4	2	0	2	1	2
6	74	NA	NA	NA	NA	NA	NA
6	75	4	0	1	2	3	1
6	76	5	2	0	1	1	2
6	77	5	1	0	1	2	2
6	78	3	1	1	3	2	1
6	79	5	1	0	1	2	2
6	80	4	2	2	2	1	0
6	81	NA	NA	NA	NA	NA	NA
6	82	4	0	1	2	3	1
6	83	3	0	0	3	3	2
6	84	3	1	0	3	2	2
6	85	5	2	0	1	1	2
6	86	5	0	0	1	3	2
6	87	5	0	0	1	3	2
6	88	5	2	0	1	1	2
6	89	5	1	0	1	2	2
6	90	NA	NA	NA	NA	NA	NA
6	91	5	1	0	1	2	2
6	92	4	0	0	2	3	2
6	93	5	2	0	1	1	2
6	94	5	1	0	1	2	2
6	95	5	0	0	NA	NA	NA
6	96	NA	NA	NA	NA	NA	NA
6	97	4	0	0	2	3	2
6	98	4	1	0	2	2	2
6	99	NA	NA	NA	NA	NA	NA
6	100	4	0	0	2	3	2
6	101	NA	NA	NA	NA	NA	NA
6	102	5	0	0	1	3	2
6	103	NA	NA	NA	NA	NA	NA
6	104	5	0	0	1	3	2
6	105	5	2	0	1	1	2
6	106	2	0	0	4	3	2
6	107	4	0	1	2	3	1
6	108	4	1	0	2	2	2
6	109	NA	NA	NA	NA	NA	NA
6	110	4	0	1	2	3	1
6	111	5	0	0	1	3	2
6	112	4	0	0	2	3	2
6	113	5	0	0	1	3	2
6	114	3	3	0	3	0	2
6	115	NA	NA	NA	NA	NA	NA
6	116	2	1	0	4	2	2
6	117	3	0	0	3	3	2
6	118	5	1	0	1	2	2
6	119	4	0	0	2	3	2
6	120	5	0	0	1	3	2
6	121	3	1	0	3	2	2
6	122	5	0	0	1	3	2

## Sheet: Table 6
Camp	Time of examination	Elephant ID	Body Condition Score	Sex	Age	Work Hour	Chain Hour	Walk Distance Day	Walk Time Day	Rouphage Day	Supplement Day	Free Foraging	Feed Day	Feed Night	Feed Total	Water Night
1	1	1	3	m	25	4.5	19.5	6000	60	150	30	N	2	Y	3	N
1	1	2	2	m	28	4.5	19.5	6000	60	150	30	N	2	Y	3	N
1	1	3	3	m	20	4.5	19.5	6000	60	150	30	N	3	Y	4	N
1	1	4	2	f	28	4.5	19.5	6000	60	150	30	N	2	N	2	N
1	1	5	3	f	25	4.5	19.5	6000	60	150	30	N	2	Y	3	N
1	1	6	3	f	18	4.5	19.5	6000	60	150	30	N	4	Y	5	N
1	1	7	2	f	18	4.5	19.5	6000	60	150	30	Y	2	Y	3	N
1	1	8	2	f	18	4.5	19.5	6000	60	150	30	Y	2	Y	3	N
1	1	9	2	f	45	4.5	19.5	6000	60	150	30	N	2	Y	3	N
1	1	10	2	f	22	4.5	19.5	6000	60	150	30	N	2	Y	3	N
1	1	11	2	f	16	4.5	19.5	0	0	150	30	N	2	Y	3	N
1	1	12	NA	f	25	4.5	19.5	6000	60	150	30	N	2	Y	3	N
2	1	13	2	m	21	4.5	19.5	2000	80	210	30	N	1	Y	2	N
2	1	14	3	m	29	0	23.5	1000	25	210	30	Y	1	Y	3	N
2	1	15	2	m	50	4.5	19.5	2000	80	210	30	N	1	Y	2	N
2	1	16	2	m	30	4.5	19.5	2000	80	210	30	N	1	Y	2	N
2	1	17	2	m	16	4.5	19.5	2000	80	210	30	N	1	Y	2	N
2	1	18	2	f	22	4.5	19.5	2000	80	150	30	N	2	Y	3	N
2	1	19	2	f	25	4.5	19.5	2000	80	150	30	N	1	Y	2	N
2	1	20	3	f	22	4.5	19.5	2000	80	150	30	N	1	Y	2	N
2	1	21	2	f	30	4.5	19.5	2000	80	150	30	N	1	Y	2	N
2	1	22	2	f	30	4.5	19.5	2000	80	150	30	N	2	Y	3	N
2	1	23	2	f	30	4.5	19.5	2000	80	150	30	N	1	Y	2	N
2	1	24	2	f	40	4.5	19.5	2000	80	150	30	N	1	Y	2	N
2	1	25	NA	f	30	NA	NA	NA	NA	150	30	N	1	Y	2	N
2	1	26	NA	f	34	NA	NA	NA	NA	150	30	N	2	Y	3	N
3	1	27	3	m	45	7	17	6500	260	182	10	N	4	Y	5	Y
3	1	28	3	m	47	7	17	6500	260	210	10	N	3	Y	4	N
3	1	29	2	m	38	7	17	6500	260	182	10	N	4	Y	5	Y
3	1	30	3	m	41	7	17	6500	260	140	10	N	4	Y	5	N
3	1	31	3	m	40	7	17	6500	260	210	10	N	2	Y	3	N
3	1	32	3	m	41	5	19	6500	260	140	10	N	4	Y	5	N
3	1	33	1	f	37	7	17	6500	260	182	10	N	4	Y	5	Y
3	1	34	2	f	43	7	17	6500	260	140	10	N	2	Y	3	N
3	1	35	1	f	37	7	17	6500	260	182	10	N	5	Y	6	Y
3	1	36	2	f	41	7	17	6500	260	140	10	N	2	Y	3	N
3	1	37	2	f	40	7	17	6500	260	182	10	N	4	Y	5	N
3	1	38	3	f	23	7	17	6500	260	182	10	N	3	Y	4	N
4	1	39	2	m	20	8	16	10000	450	100	10	N	3	Y	4	N
4	1	40	3	m	42	8	16	10000	450	100	10	N	3	Y	4	N
4	1	41	3	m	20	0	24	0	0	100	0	N	3	Y	4	N
4	1	42	NA	m	24	0	24	0	0	100	0	N	3	Y	4	N
4	1	43	3	m	28	7	17	4000	160	100	10	N	3	Y	4	N
4	1	44	3	m	27	8	16	10000	450	100	10	N	3	Y	4	N
4	1	45	NA	f	45	8	16	10000	450	100	10	N	3	Y	4	N
4	1	46	2	f	40	8	16	10000	450	100	10	N	3	Y	4	N
4	1	47	NA	f	35	8	16	10000	450	100	10	N	2	Y	3	N
4	1	48	2	f	42	8	16	10000	450	100	10	N	4	Y	5	N
4	1	49	3	f	30	8	16	10000	450	100	10	N	3	Y	4	N
4	1	50	2	f	20	8	16	10000	450	100	10	N	3	Y	4	N
5	1	51	1	f	46	0	0	2000	30	165	20	N	4	N	4	Y
5	1	52	1	f	33	5.5	0	2000	30	165	20	N	2	N	2	Y
5	1	53	2	f	35	5.5	0	2000	30	165	20	N	4	N	4	Y
5	1	54	1	f	41	5	0	3000	300	165	20	Y	2	N	2	Y
5	1	55	3	f	39	5	0	3000	300	165	20	Y	2	N	2	N
5	1	56	2	f	30	5	0	3000	300	165	20	Y	2	N	2	N
5	1	57	1	f	31	0	0	2000	20	165	20	N	2	N	2	N
5	1	58	1	f	34	5.5	0	2000	30	165	20	N	5	N	5	Y
5	1	59	1	f	50	5.5	0	2000	30	165	20	N	5	N	5	Y
5	1	60	2	f	29	5.5	0	2000	30	165	20	N	4	N	4	Y
5	1	61	1	f	30	5	0	3000	300	165	20	Y	2	N	2	Y
5	1	62	1	f	40	5.5	0	2000	30	165	20	N	4	N	4	Y
5	1	63	NA	f	25	NA	NA	NA	NA	165	20	Y	2	N	2	Y
5	1	64	NA	f	35	NA	NA	NA	NA	165	20	N	2	N	2	Y
5	1	65	NA	f	30	NA	NA	NA	NA	165	20	N	2	N	2	Y
6	1	66	4	m	40	0	24	0	0	250	0	N	4	Y	5	N
6	1	67	NA	m	28	0	24	0	0	500	0	N	5	Y	6	N
6	1	68	3	m	35	7	17	8000	320	250	5	N	5	Y	6	N
6	1	69	2	m	35	0	24	0	0	250	5	N	5	Y	6	N
6	1	70	2	f	35	7	17	8000	320	200	5	N	5	Y	6	N
6	1	71	NA	m	22	0	24	0	0	200	0	N	3	Y	4	N
6	1	72	2	f	40	7	17	8000	320	90	5	Y	5	N	5	N
6	1	73	2	f	30	7	17	8000	320	180	5	Y	2	N	2	N
6	1	74	NA	f	18	4	20	5000	200	200	8	N	5	Y	6	N
6	1	75	2	f	40	4	20	5000	200	200	8	Y	5	Y	6	N
6	1	76	2	f	40	7	17	8000	320	200	5	Y	2	N	2	N
6	1	77	2	f	26	7	17	8000	320	200	5	N	5	Y	6	N
6	1	78	NA	m	40	NA	NA	NA	NA	200	5	N	5	Y	6	N
7	1	79	2	f	56	5	16	3000	90	12	5	Y	2	Y	3	N
7	1	80	3	f	50	5	16	3000	90	12	5	Y	2	Y	3	N
7	1	81	3	f	50	5	16	3000	90	12	5	Y	2	Y	3	N
7	1	82	2	f	32	5	16	3000	90	12	5	Y	2	Y	3	N
7	1	83	NA	f	50	NA	NA	NA	NA	12	5	Y	2	Y	3	N
8	1	84	2	m	20	7.5	16.5	2000	80	125	30	Y	2	Y	3	N
8	1	85	1	f	35	7.5	16.5	2000	80	125	30	Y	3	Y	4	N
8	1	86	1	f	30	7.5	16.5	2000	80	125	30	Y	3	Y	4	N
8	1	87	1	f	24	7.5	16.5	2000	80	125	30	Y	3	Y	4	N
8	1	88	2	f	25	7.5	16.5	2000	80	140	30	N	3	Y	4	N
8	1	89	1	f	18	7.5	16.5	2000	80	125	30	Y	2	Y	3	N
9	1	90	3	m	55	2	22	4000	60	300	15	Y	3	N	3	N
9	1	91	2	f	29	2	22	4000	60	200	15	Y	3	N	3	N
9	1	92	2	f	49	2	22	4000	60	200	15	Y	3	N	3	N
9	1	93	1	f	49	2	22	4000	60	200	15	Y	3	N	3	N
9	1	94	NA	f	40	NA	NA	NA	NA	200	15	Y	3	N	3	N
10	1	95	NA	m	40	0	24	0	0	150	0	Y	2	Y	3	N
10	1	96	2	f	32	7	17	8000	240	120	5	Y	3	Y	4	N
10	1	97	2	f	28	7	17	8000	240	120	5	Y	3	Y	4	N
10	1	98	2	f	43	7	17	8000	240	120	5	Y	3	Y	4	N
10	1	99	2	f	28	7	17	8000	240	120	5	Y	3	Y	4	N
10	1	100	2	f	25	7	17	8000	240	100	5	Y	3	Y	4	N
11	1	101	3	m	40	6	18	0	0	65	5	N	4	N	4	N
11	1	102	2	m	5	6	18	3000	60	65	5	N	4	N	4	N
11	1	103	4	f	60	6	18	3000	60	65	5	N	4	N	4	N
11	1	104	1	f	40	6	18	3000	60	65	5	N	4	N	4	N
11	1	105	3	f	40	6	18	3000	60	65	5	N	3	Y	4	N
12	1	106	3	m	30	1	23	30	10	75	10	N	4	Y	5	N
12	1	107	3	f	15	1	23	10	25	75	10	N	4	Y	5	N
12	1	108	3	f	53	1	23	10	25	75	10	N	4	Y	5	N
12	1	109	2	f	50	1	23	10	25	75	10	N	4	Y	5	N
12	1	110	3	m	5	1	23	10	30	50	10	N	5	Y	6	N
13	1	111	2	f	30	7	17	6000	120	100	20	Y	4	N	4	N
13	1	112	2	f	35	7	17	6000	120	100	20	Y	4	N	4	N
13	1	113	1	f	40	7	17	6000	120	100	20	Y	3	N	3	N
13	1	114	2	f	38	7	17	6000	120	100	20	Y	4	N	4	N
13	1	115	2	f	32	7	17	6000	120	100	20	Y	4	N	4	N
14	1	116	3	f	30	4.5	0	3000	120	150	45	N	2	N	2	Y
14	1	117	2	f	30	4.5	0	3000	120	150	45	N	2	N	2	Y
14	1	118	1	f	30	4.5	0	3000	120	150	45	N	2	N	2	Y
15	1	119	2	f	65	3.5	0	1000	180	150	100	Y	4	Y	5	N
15	1	120	1	f	40	3.5	0	1000	180	150	100	Y	4	Y	5	N
15	1	121	3	f	60	3.5	0	1000	180	150	100	Y	4	Y	5	N
15	1	122	1	f	60	3.5	0	1000	180	150	100	Y	4	Y	5	N
1	2	1	NA	m	25	NA	NA	12000	120	150	30	N	2	Y	3	N
1	2	2	2	m	28	7	17	12000	120	150	30	N	2	Y	3	N
1	2	3	3	m	20	7	17	12000	120	150	30	N	3	Y	4	N
1	2	4	2	f	28	7	17	12000	120	150	30	N	2	N	2	N
1	2	5	3	f	25	7	17	12000	120	150	30	N	2	Y	3	N
1	2	6	3	f	18	7	17	12000	120	150	30	N	4	Y	5	N
1	2	7	2	f	18	7	17	12000	120	150	30	Y	2	Y	3	N
1	2	8	1	f	18	7	17	12000	120	150	30	Y	2	Y	3	N
1	2	9	2	f	45	7	17	12000	120	150	30	N	2	Y	3	N
1	2	10	2	f	22	7	17	12000	120	150	30	N	2	Y	3	N
1	2	11	2	f	16	7	17	12000	120	150	30	N	2	Y	3	N
1	2	12	3	f	25	7	17	12000	120	150	30	N	2	Y	3	N
2	2	13	2	m	21	1	23	1000	40	210	30	N	1	Y	2	N
2	2	14	2	m	29	0	23.5	1000	25	210	30	Y	1	Y	3	N
2	2	15	2	m	50	1	23	1000	40	210	30	N	1	Y	2	N
2	2	16	2	m	30	1	23	1000	40	210	30	N	1	Y	2	N
2	2	17	2	m	16	1	23	1000	40	210	30	N	1	Y	2	N
2	2	18	2	f	22	1	23	1000	40	150	30	N	2	Y	3	N
2	2	19	2	f	25	1	23	1000	40	150	30	N	1	Y	2	N
2	2	20	NA	f	22	NA	NA	NA	NA	150	30	N	1	Y	2	N
2	2	21	2	f	30	1	23	1000	40	150	30	N	1	Y	2	N
2	2	22	2	f	30	1	23	1000	40	150	30	N	2	Y	3	N
2	2	23	1	f	30	1	23	1000	40	150	30	N	1	Y	2	N
2	2	24	2	f	40	0	24	1000	40	150	0	N	1	Y	2	N
2	2	25	2	f	30	1	23	1000	40	150	30	N	1	Y	2	N
2	2	26	NA	f	34	NA	NA	NA	NA	150	30	N	2	Y	3	N
3	2	27	3	m	45	6	18	2500	100	182	10	N	4	Y	5	Y
3	2	28	3	m	47	6	18	2500	100	210	10	N	3	Y	4	N
3	2	29	2	m	38	6	18	2500	100	182	10	N	4	Y	5	Y
3	2	30	NA	m	41	0	24	0	0	140	0	N	4	Y	5	N
3	2	31	4	m	40	6	18	2500	100	210	10	N	2	Y	3	N
3	2	32	3	m	41	6	18	2500	100	140	10	N	4	Y	5	N
3	2	33	1	f	37	6	18	2500	100	182	10	N	4	Y	5	Y
3	2	34	2	f	43	6	18	2500	100	140	10	N	2	Y	3	N
3	2	35	1	f	37	6	18	2500	100	182	10	N	5	Y	6	Y
3	2	36	2	f	41	6	18	2500	100	140	10	N	2	Y	3	N
3	2	37	2	f	40	6	18	2500	100	182	10	N	4	Y	5	N
3	2	38	2	f	23	6	18	2500	100	182	10	N	3	Y	4	N
4	2	39	2	m	20	6	18	3000	135	100	10	N	3	Y	4	N
4	2	40	3	m	42	6	18	3000	135	100	10	N	3	Y	4	N
4	2	41	4	m	20	6	18	3000	135	100	10	N	3	Y	4	N
4	2	42	3	m	24	6	18	3000	120	100	10	N	3	Y	4	N
4	2	43	3	m	28	6	18	3000	120	100	10	N	3	Y	4	N
4	2	44	NA	m	27	0	24	0	0	100	0	N	3	Y	4	N
4	2	45	3	f	45	6	18	3000	135	100	10	N	3	Y	4	N
4	2	46	2	f	40	6	18	3000	135	100	10	N	3	Y	4	N
4	2	47	3	f	35	6	18	3000	135	100	10	N	2	Y	3	N
4	2	48	2	f	42	6	18	3000	135	100	10	N	4	Y	5	N
4	2	49	3	f	30	6	18	3000	135	100	10	N	3	Y	4	N
4	2	50	2	f	20	6	18	3000	135	100	10	N	3	Y	4	N
5	2	51	1	f	46	0	0	2000	30	165	20	N	4	N	4	Y
5	2	52	1	f	33	5.5	0	2000	30	165	20	N	2	N	2	Y
5	2	53	NA	f	35	NA	0	NA	NA	165	20	N	4	N	4	Y
5	2	54	1	f	41	5	0	3000	300	165	20	Y	2	N	2	Y
5	2	55	3	f	39	5	0	3000	300	165	20	Y	2	N	2	N
5	2	56	2	f	30	5	0	3000	300	165	20	Y	2	N	2	N
5	2	57	1	f	31	0	0	2000	20	165	20	N	2	N	2	N
5	2	58	1	f	34	5.5	0	2000	30	165	20	N	5	N	5	Y
5	2	59	1	f	50	5.5	0	2000	30	165	20	N	5	N	5	Y
5	2	60	NA	f	29	NA	0	NA	NA	165	20	N	4	N	4	Y
5	2	61	1	f	30	5	0	3000	300	165	20	Y	2	N	2	Y
5	2	62	NA	f	40	NA	0	NA	NA	165	20	N	4	N	4	Y
5	2	63	1	f	25	0	0	2000	20	165	20	Y	2	N	2	Y
5	2	64	1	f	35	5.5	0	2000	30	165	20	N	2	N	2	Y
5	2	65	1	f	30	0	0	2000	20	165	20	N	2	N	2	Y
6	2	66	4	m	40	0	24	0	0	250	0	N	4	Y	5	N
6	2	67	2	m	28	7	17	3000	120	500	5	Y	5	Y	6	N
6	2	68	3	m	35	7	17	4000	160	250	5	N	5	Y	6	N
6	2	69	2	m	35	7	17	4000	160	250	5	N	5	Y	6	N
6	2	70	2	f	35	7	17	4000	160	200	5	N	5	Y	6	N
6	2	71	3	m	22	7	17	4000	160	200	5	N	3	Y	4	N
6	2	72	2	f	40	7	17	4000	160	90	5	Y	5	N	5	N
6	2	73	3	f	30	7	17	4000	160	180	5	Y	2	N	2	N
6	2	74	NA	f	18	4	20	1500	60	200	8	N	5	Y	6	N
6	2	75	2	f	40	0	24	0	0	200	0	Y	5	Y	6	N
6	2	76	2	f	40	7	17	4000	160	200	5	Y	2	N	2	N
6	2	77	NA	f	26	NA	NA	NA	NA	200	5	N	5	Y	6	N
6	2	78	NA	m	40	NA	NA	NA	NA	200	5	N	5	Y	6	N
7	2	79	2	f	56	4.5	16.5	3000	90	12	5	Y	2	Y	3	N
7	2	80	3	f	50	4.5	16.5	3000	90	12	5	Y	2	Y	3	N
7	2	81	NA	f	50	NA	NA	NA	NA	NA	NA	Y	2	Y	3	N
7	2	82	2	f	32	4.5	16.5	3000	90	12	5	Y	2	Y	3	N
7	2	83	4	f	50	4.5	16.5	3000	90	12	5	Y	2	Y	3	N
8	2	84	2	m	20	8	16	2000	80	125	30	Y	2	Y	3	N
8	2	85	1	f	35	8	16	2000	80	125	30	Y	3	Y	4	N
8	2	86	1	f	30	8	16	2000	80	125	30	Y	3	Y	4	N
8	2	87	2	f	24	8	16	2000	80	125	30	Y	3	Y	4	N
8	2	88	2	f	25	8	16	2000	80	140	30	N	3	Y	4	N
8	2	89	1	f	18	8	16	2000	80	125	30	Y	2	Y	3	N
9	2	90	3	m	55	2	22	4000	60	300	15	Y	3	N	3	N
9	2	91	2	f	29	2	22	4000	60	200	15	Y	3	N	3	N
9	2	92	2	f	49	2	22	4000	60	200	15	Y	3	N	3	N
9	2	93	1	f	49	2	22	4000	60	200	15	Y	3	N	3	N
9	2	94	1	f	40	2	22	4000	60	200	15	Y	3	N	3	N
10	2	95	2	m	40	9	15	12000	360	150	30	Y	2	Y	3	N
10	2	96	2	f	32	9	15	12000	360	120	5	Y	3	Y	4	N
10	2	97	2	f	28	9	15	12000	360	120	5	Y	3	Y	4	N
10	2	98	2	f	43	9	15	12000	360	120	5	Y	3	Y	4	N
10	2	99	NA	f	28	NA	NA	NA	NA	120	5	Y	3	Y	4	N
10	2	100	2	f	25	9	15	12000	360	100	5	Y	3	Y	4	N
11	2	101	3	m	40	7	17	1000	20	65	5	N	4	N	4	N
11	2	102	NA	m	5	NA	NA	NA	NA	65	5	N	4	N	4	N
11	2	103	4	f	60	7	17	1000	20	65	5	N	4	N	4	N
11	2	104	1	f	40	7	17	1000	20	65	5	N	4	N	4	N
11	2	105	2	f	40	7	17	1000	20	65	5	N	3	Y	4	N
12	2	106	3	m	30	3	21	30	10	75	10	N	4	Y	5	N
12	2	107	3	f	15	3	21	10	25	75	10	N	4	Y	5	N
12	2	108	3	f	53	3	21	10	25	75	10	N	4	Y	5	N
12	2	109	2	f	50	3	21	10	25	75	10	N	4	Y	5	N
12	2	110	3	m	5	3	21	10	30	50	10	N	5	Y	6	N
13	2	111	2	f	30	6.5	17.5	6000	120	100	20	Y	4	N	4	N
13	2	112	2	f	35	6.5	17.5	6000	120	100	20	Y	4	N	4	N
13	2	113	2	f	40	6.5	17.5	6000	120	100	20	Y	3	N	3	N
13	2	114	3	f	38	6.5	17.5	6000	120	100	20	Y	4	N	4	N
13	2	115	2	f	32	6.5	17.5	6000	120	100	20	Y	4	N	4	N
14	2	116	3	f	30	4.5	0	3000	120	150	45	N	2	N	2	Y
14	2	117	2	f	30	4.5	0	3000	120	150	45	N	2	N	2	Y
14	2	118	1	f	30	4.5	0	3000	120	150	45	N	2	N	2	Y
15	2	119	2	f	65	3.5	0	1000	180	150	100	Y	4	Y	5	N
15	2	120	1	f	40	3.5	0	1000	180	150	100	Y	4	Y	5	N
15	2	121	3	f	60	3.5	0	1000	180	150	100	Y	4	Y	5	N
15	2	122	1	f	60	3.5	0	1000	180	150	100	Y	4	Y	5	N
1	3	1	3	m	25	8.5	15.5	12000	120	150	30	N	2	Y	3	N
1	3	2	2	m	28	8.5	15.5	12000	120	150	30	N	2	Y	3	N
1	3	3	2	m	20	8.5	15.5	12000	120	150	30	N	3	Y	4	N
1	3	4	2	f	28	8.5	15.5	12000	120	150	30	N	2	N	2	N
1	3	5	3	f	25	8.5	15.5	12000	120	150	30	N	2	Y	3	N
1	3	6	3	f	18	8.5	15.5	12000	120	150	30	N	4	Y	5	N
1	3	7	2	f	18	8.5	15.5	12000	120	150	30	Y	2	Y	3	N
1	3	8	2	f	18	8.5	15.5	12000	120	150	30	Y	2	Y	3	N
1	3	9	1	f	45	8.5	15.5	12000	120	150	30	N	2	Y	3	N
1	3	10	3	f	22	8.5	15.5	12000	120	150	30	N	2	Y	3	N
1	3	11	1	f	16	8.5	15.5	12000	120	150	30	N	2	Y	3	N
1	3	12	2	f	25	8.5	15.5	12000	120	150	30	N	2	Y	3	N
2	3	13	2	m	21	4	20	2000	80	210	30	N	1	Y	2	N
2	3	14	2	m	29	0	23.5	1000	25	210	30	Y	1	Y	3	N
2	3	15	2	m	50	4	20	2000	80	210	30	N	1	Y	2	N
2	3	16	2	m	30	4	20	2000	80	210	30	N	1	Y	2	N
2	3	17	2	m	16	4	20	2000	80	210	30	N	1	Y	2	N
2	3	18	2	f	22	4	20	2000	80	150	30	N	2	Y	3	N
2	3	19	2	f	25	4	20	2000	80	150	30	N	1	Y	2	N
2	3	20	NA	f	22	NA	NA	NA	NA	150	30	N	1	Y	2	N
2	3	21	2	f	30	4	20	2000	80	150	30	N	1	Y	2	N
2	3	22	2	f	30	4	20	2000	80	150	30	N	2	Y	3	N
2	3	23	1	f	30	4	20	2000	80	150	30	N	1	Y	2	N
2	3	24	NA	f	40	NA	NA	NA	NA	150	30	N	1	Y	2	N
2	3	25	2	f	30	4	20	2000	80	150	30	N	1	Y	2	N
2	3	26	1	f	34	4	20	2000	80	150	30	N	2	Y	3	N
3	3	27	4	m	45	7	17	3500	140	182	10	N	4	Y	5	Y
3	3	28	3	m	47	0	24	0	0	210	0	N	3	Y	4	N
3	3	29	2	m	38	7	17	3500	140	182	10	N	4	Y	5	Y
3	3	30	4	m	41	7	17	3500	140	140	10	N	4	Y	5	N
3	3	31	3	m	40	7	17	3500	140	210	10	N	2	Y	3	N
3	3	32	3	m	41	7	17	3500	140	140	10	N	4	Y	5	N
3	3	33	1	f	37	0	24	0	0	182	0	N	4	Y	5	Y
3	3	34	1	f	43	7	17	3500	140	140	10	N	2	Y	3	N
3	3	35	2	f	37	7	17	3500	140	182	10	N	5	Y	6	Y
3	3	36	2	f	41	7	17	3500	140	140	10	N	2	Y	3	N
3	3	37	2	f	40	7	17	3500	140	182	10	N	4	Y	5	N
3	3	38	2	f	23	7	17	3500	140	182	10	N	3	Y	4	N
4	3	39	2	m	20	6.5	17.5	3000	135	100	10	N	3	Y	4	N
4	3	40	4	m	42	6.5	17.5	3000	135	100	10	N	3	Y	4	N
4	3	41	3	m	20	6.5	17.5	3000	135	100	10	N	3	Y	4	N
4	3	42	3	m	24	6.5	17.5	4000	160	100	10	N	3	Y	4	N
4	3	43	3	m	28	6.5	17.5	5000	200	100	10	N	3	Y	4	N
4	3	44	4	m	27	0	24	0	0	100	0	N	3	Y	4	N
4	3	45	3	f	45	6.5	17.5	3000	135	100	10	N	3	Y	4	N
4	3	46	2	f	40	6.5	17.5	3000	135	100	10	N	3	Y	4	N
4	3	47	3	f	35	6.5	17.5	3000	135	100	10	N	2	Y	3	N
4	3	48	2	f	42	6.5	17.5	3000	135	100	10	N	4	Y	5	N
4	3	49	4	f	30	6.5	17.5	3000	135	100	10	N	3	Y	4	N
4	3	50	2	f	20	6.5	17.5	3000	135	100	10	N	3	Y	4	N
5	3	51	1	f	46	0	0	2000	30	165	20	N	4	N	4	Y
5	3	52	1	f	33	5.5	0	2000	30	165	20	N	2	N	2	Y
5	3	53	NA	f	35	NA	0	NA	NA	165	20	N	4	N	4	Y
5	3	54	1	f	41	5	0	3000	300	165	20	Y	2	N	2	Y
5	3	55	3	f	39	5	0	3000	300	165	20	Y	2	N	2	N
5	3	56	NA	f	30	NA	NA	NA	NA	NA	NA	Y	2	N	2	N
5	3	57	1	f	31	0	0	2000	20	165	20	N	2	N	2	N
5	3	58	1	f	34	5.5	0	2000	30	165	20	N	5	N	5	Y
5	3	59	1	f	50	5.5	0	2000	30	165	20	N	5	N	5	Y
5	3	60	NA	f	29	NA	0	NA	NA	165	20	N	4	N	4	Y
5	3	61	1	f	30	5	0	3000	300	165	20	Y	2	N	2	Y
5	3	62	NA	f	40	NA	0	NA	NA	165	20	N	4	N	4	Y
5	3	63	1	f	25	0	0	2000	20	165	20	Y	2	N	2	Y
5	3	64	1	f	35	5.5	0	2000	30	165	20	N	2	N	2	Y
5	3	65	1	f	30	0	0	2000	20	165	20	N	2	N	2	Y
6	3	66	4	m	40	0	24	0	0	250	0	N	4	Y	5	N
6	3	67	2	m	28	6.5	17.5	3000	120	500	5	Y	5	Y	6	N
6	3	68	3	m	35	6.5	17.5	6500	260	250	5	N	5	Y	6	N
6	3	69	3	m	35	6.5	17.5	6500	260	250	5	N	5	Y	6	N
6	3	70	NA	f	35	3.5	20.5	5000	200	200	5	N	5	Y	6	N
6	3	71	3	m	22	0	24	0	0	200	0	N	3	Y	4	N
6	3	72	2	f	40	6.5	17.5	6500	260	90	5	Y	5	N	5	N
6	3	73	3	f	30	6.5	17.5	6500	260	180	5	Y	2	N	2	N
6	3	74	NA	f	18	3.5	20.5	5000	200	200	8	N	5	Y	6	N
6	3	75	2	f	40	2	22	3000	120	200	8	Y	5	Y	6	N
6	3	76	1	f	40	6.5	17.5	6500	260	200	5	Y	2	N	2	N
6	3	77	2	f	26	6.5	17.5	6500	260	200	5	N	5	Y	6	N
6	3	78	NA	m	40	NA	NA	NA	NA	200	5	N	5	Y	6	N
7	3	79	2	f	56	5	16	3000	90	12	5	Y	2	Y	3	N
7	3	80	3	f	50	5	16	3000	90	12	5	Y	2	Y	3	N
7	3	81	NA	f	50	NA	NA	NA	NA	12	5	Y	2	Y	3	N
7	3	82	2	f	32	5	16	3000	90	12	5	Y	2	Y	3	N
7	3	83	4	f	50	0	21	3000	90	12	0	Y	2	Y	3	N
8	3	84	2	m	20	6	18	2000	80	125	30	Y	2	Y	3	N
8	3	85	1	f	35	6	18	2000	80	125	30	Y	3	Y	4	N
8	3	86	1	f	30	6	18	2000	80	125	30	Y	3	Y	4	N
8	3	87	2	f	24	6	18	2000	80	125	30	Y	3	Y	4	N
8	3	88	2	f	25	6	18	2000	80	140	30	N	3	Y	4	N
8	3	89	1	f	18	6	18	2000	80	125	30	Y	2	Y	3	N
9	3	90	4	m	55	5	19	4000	60	300	15	Y	3	N	3	N
9	3	91	2	f	29	5	19	4000	60	200	15	Y	3	N	3	N
9	3	92	2	f	49	5	19	4000	60	200	15	Y	3	N	3	N
9	3	93	1	f	49	5	19	4000	60	200	15	Y	3	N	3	N
9	3	94	1	f	40	5	19	4000	60	200	15	Y	3	N	3	N
10	3	95	2	m	40	9	15	8000	240	150	30	Y	2	Y	3	N
10	3	96	2	f	32	9	15	8000	240	120	5	Y	3	Y	4	N
10	3	97	2	f	28	9	15	8000	240	120	5	Y	3	Y	4	N
10	3	98	2	f	43	9	15	8000	240	120	5	Y	3	Y	4	N
10	3	99	NA	f	28	NA	NA	NA	NA	120	5	Y	3	Y	4	N
10	3	100	2	f	25	9	15	8000	240	100	5	Y	3	Y	4	N
11	3	101	3	m	40	4.5	19.5	3000	60	65	5	N	4	N	4	N
11	3	102	2	m	5	4.5	19.5	3000	60	65	5	N	4	N	4	N
11	3	103	4	f	60	0	24	0	0	65	0	N	4	N	4	N
11	3	104	2	f	40	4.5	19.5	3000	60	65	5	N	4	N	4	N
11	3	105	3	f	40	4.5	19.5	3000	60	65	5	N	3	Y	4	N
12	3	106	3	m	30	3	21	30	10	75	10	N	4	Y	5	N
12	3	107	3	f	15	3	21	10	25	75	10	N	4	Y	5	N
12	3	108	3	f	53	3	21	10	25	75	10	N	4	Y	5	N
12	3	109	2	f	50	3	21	10	25	75	10	N	4	Y	5	N
12	3	110	3	m	5	3	21	10	30	50	10	N	5	Y	6	N
13	3	111	2	f	30	6	18	6000	120	100	20	Y	4	N	4	N
13	3	112	2	f	35	6	18	6000	120	100	20	Y	4	N	4	N
13	3	113	1	f	40	6	18	6000	120	100	20	Y	3	N	3	N
13	3	114	3	f	38	6	18	6000	120	100	20	Y	4	N	4	N
13	3	115	2	f	32	6	18	6000	120	100	20	Y	4	N	4	N
14	3	116	3	f	30	4.5	0	3000	120	150	45	N	2	N	2	Y
14	3	117	2	f	30	4.5	0	3000	120	150	45	N	2	N	2	Y
14	3	118	1	f	30	4.5	0	3000	120	150	45	N	2	N	2	Y
15	3	119	3	f	65	3.5	0	1000	180	150	100	Y	4	Y	5	N
15	3	120	1	f	40	3.5	0	1000	180	150	100	Y	4	Y	5	N
15	3	121	3	f	60	3.5	0	1000	180	150	100	Y	4	Y	5	N
15	3	122	1	f	60	3.5	0	1000	180	150	100	Y	4	Y	5	N
1	4	1	3	m	25	7	17	12000	120	150	30	N	2	Y	3	N
1	4	2	3	m	28	7	17	12000	120	150	30	N	2	Y	3	N
1	4	3	3	m	20	7	17	12000	120	150	30	N	3	Y	4	N
1	4	4	3	f	28	7	17	12000	120	150	30	N	2	N	2	N
1	4	5	3	f	25	7	17	12000	120	150	30	N	2	Y	3	N
1	4	6	3	f	18	7	17	12000	120	150	30	N	4	Y	5	N
1	4	7	3	f	18	7	17	12000	120	150	30	Y	2	Y	3	N
1	4	8	2	f	18	7	17	12000	120	150	30	Y	2	Y	3	N
1	4	9	2	f	45	7	17	12000	120	150	30	N	2	Y	3	N
1	4	10	4	f	22	7	17	12000	120	150	30	N	2	Y	3	N
1	4	11	3	f	16	7	17	12000	120	150	30	N	2	Y	3	N
1	4	12	4	f	25	7	17	12000	120	150	30	N	2	Y	3	N
2	4	13	2	m	21	4.5	19.5	2000	80	210	30	N	1	Y	2	N
2	4	14	3	m	29	0	23.5	1000	25	210	30	Y	1	Y	3	N
2	4	15	NA	m	50	0	24	0	0	210	0	N	1	Y	2	N
2	4	16	2	m	30	4.5	19.5	2000	80	210	30	N	1	Y	2	N
2	4	17	2	m	16	4.5	19.5	2000	80	210	30	N	1	Y	2	N
2	4	18	1	f	22	4.5	19.5	2000	80	150	30	N	2	Y	3	N
2	4	19	NA	f	25	NA	NA	NA	NA	150	30	N	1	Y	2	N
2	4	20	NA	f	22	NA	NA	NA	NA	150	30	N	1	Y	2	N
2	4	21	2	f	30	4.5	19.5	2000	80	150	30	N	1	Y	2	N
2	4	22	2	f	30	4.5	19.5	2000	80	150	30	N	2	Y	3	N
2	4	23	1	f	30	4.5	19.5	2000	80	150	30	N	1	Y	2	N
2	4	24	NA	f	40	NA	NA	NA	NA	150	30	N	1	Y	2	N
2	4	25	2	f	30	4.5	19.5	2000	80	150	30	N	1	Y	2	N
2	4	26	1	f	34	4.5	19.5	2000	80	150	30	N	2	Y	3	N
3	4	27	4	m	45	7	17	3500	140	182	10	N	4	Y	5	Y
3	4	28	NA	m	47	0	24	0	0	210	0	N	3	Y	4	N
3	4	29	3	m	38	7	17	3500	140	182	10	N	4	Y	5	Y
3	4	30	3	m	41	7	17	3500	140	140	10	N	4	Y	5	N
3	4	31	3	m	40	7	17	3500	140	210	10	N	2	Y	3	N
3	4	32	3	m	41	7	17	3500	140	140	10	N	4	Y	5	N
3	4	33	1	f	37	7	17	3500	140	182	10	N	4	Y	5	Y
3	4	34	1	f	43	7	17	3500	140	140	10	N	2	Y	3	N
3	4	35	1	f	37	0	24	0	0	182	0	N	5	Y	6	Y
3	4	36	2	f	41	7	17	3500	140	140	10	N	2	Y	3	N
3	4	37	2	f	40	7	17	3500	140	182	10	N	4	Y	5	N
3	4	38	3	f	23	7	17	3500	140	182	10	N	3	Y	4	N
4	4	39	2	m	20	7	17	5000	225	100	10	N	3	Y	4	N
4	4	40	4	m	42	7	17	5000	225	100	10	N	3	Y	4	N
4	4	41	3	m	20	4	20	5000	225	100	10	N	3	Y	4	N
4	4	42	3	m	24	4	20	3000	120	100	10	N	3	Y	4	N
4	4	43	3	m	28	4	20	3000	120	100	10	N	3	Y	4	N
4	4	44	4	m	27	7	17	5000	225	100	10	N	3	Y	4	N
4	4	45	2	f	45	7	17	5000	225	100	10	N	3	Y	4	N
4	4	46	1	f	40	7	17	5000	225	100	10	N	3	Y	4	N
4	4	47	3	f	35	7	17	5000	225	100	10	N	2	Y	3	N
4	4	48	2	f	42	7	17	5000	225	100	10	N	4	Y	5	N
4	4	49	3	f	30	7	17	5000	225	100	10	N	3	Y	4	N
4	4	50	2	f	20	7	17	5000	225	100	10	N	3	Y	4	N
5	4	51	1	f	46	0	0	2000	30	165	20	N	4	N	4	Y
5	4	52	1	f	33	5.5	0	2000	30	165	20	N	2	N	2	Y
5	4	53	NA	f	35	NA	0	NA	NA	165	20	N	4	N	4	Y
5	4	54	1	f	41	5	0	3000	300	165	20	Y	2	N	2	Y
5	4	55	3	f	39	5	0	3000	300	165	20	Y	2	N	2	N
5	4	56	NA	f	30	NA	NA	NA	NA	NA	NA	Y	2	N	2	N
5	4	57	1	f	31	0	0	2000	20	165	20	N	2	N	2	N
5	4	58	1	f	34	5.5	0	2000	30	165	20	N	5	N	5	Y
5	4	59	1	f	50	5.5	0	2000	30	165	20	N	5	N	5	Y
5	4	60	NA	f	29	NA	0	NA	NA	165	20	N	4	N	4	Y
5	4	61	1	f	30	5	0	3000	300	165	20	Y	2	N	2	Y
5	4	62	NA	f	40	NA	0	NA	NA	165	20	N	4	N	4	Y
5	4	63	1	f	25	0	0	2000	20	165	20	Y	2	N	2	Y
5	4	64	1	f	35	5.5	0	2000	30	165	20	N	2	N	2	Y
5	4	65	1	f	30	0	0	2000	20	165	20	N	2	N	2	Y
6	4	66	3	m	40	6	18	3000	120	250	5	N	4	Y	5	N
6	4	67	NA	m	28	0	24	0	0	500	0	Y	5	Y	6	N
6	4	68	2	m	35	6	18	3000	120	250	5	N	5	Y	6	N
6	4	69	2	m	35	6	18	3000	120	250	5	N	5	Y	6	N
6	4	70	1	f	35	6	18	3000	120	200	5	N	5	Y	6	N
6	4	71	2	m	22	6	18	3000	120	200	5	N	3	Y	4	N
6	4	72	2	f	40	6	18	3000	120	90	5	Y	5	N	5	N
6	4	73	3	f	30	6	18	3000	120	180	5	Y	2	N	2	N
6	4	74	NA	f	18	0	24	0	0	200	8	N	5	Y	6	N
6	4	75	3	f	40	4	20	2000	80	200	8	Y	5	Y	6	N
6	4	76	1	f	40	6	18	3000	120	200	5	Y	2	N	2	N
6	4	77	2	f	26	0	24	0	0	200	0	N	5	Y	6	N
6	4	78	NA	m	40	0	24	0	0	200	5	N	5	Y	6	N
7	4	79	NA	f	56	0	24	0	0	12	0	Y	2	Y	3	N
7	4	80	3	f	50	2.5	21.5	3000	90	12	5	Y	2	Y	3	N
7	4	81	NA	f	50	NA	NA	NA	NA	NA	NA	Y	2	Y	3	N
7	4	82	2	f	32	2.5	21.5	3000	90	12	5	Y	2	Y	3	N
7	4	83	3	f	50	2.5	21.5	3000	90	12	5	Y	2	Y	3	N
8	4	84	2	m	20	7.5	16.5	2000	80	125	30	Y	2	Y	3	N
8	4	85	1	f	35	7.5	16.5	2000	80	125	30	Y	3	Y	4	N
8	4	86	1	f	30	7.5	16.5	2000	80	125	30	Y	3	Y	4	N
8	4	87	1	f	24	7.5	16.5	2000	80	125	30	Y	3	Y	4	N
8	4	88	2	f	25	7.5	16.5	2000	80	140	30	N	3	Y	4	N
8	4	89	1	f	18	7.5	16.5	2000	80	125	30	Y	2	Y	3	N
9	4	90	NA	m	55	NA	NA	NA	NA	NA	NA	Y	3	N	3	N
9	4	91	1	f	29	5	19	4000	60	200	15	Y	3	N	3	N
9	4	92	1	f	49	5	19	4000	60	200	15	Y	3	N	3	N
9	4	93	2	f	49	5	19	4000	60	200	15	Y	3	N	3	N
9	4	94	2	f	40	5	19	4000	60	200	15	Y	3	N	3	N
10	4	95	1	m	40	3	21	4000	120	150	30	Y	2	Y	3	N
10	4	96	1	f	32	3	21	4000	120	120	5	Y	3	Y	4	N
10	4	97	2	f	28	3	21	4000	120	120	5	Y	3	Y	4	N
10	4	98	2	f	43	3	21	4000	120	120	5	Y	3	Y	4	N
10	4	99	NA	f	28	NA	NA	NA	NA	120	5	Y	3	Y	4	N
10	4	100	2	f	25	3	21	4000	120	100	5	Y	3	Y	4	N
11	4	101	NA	m	40	0	24	0	0	65	0	N	4	N	4	N
11	4	102	2	m	5	7	17	3000	60	65	5	N	4	N	4	N
11	4	103	4	f	60	7	17	3000	60	65	5	N	4	N	4	N
11	4	104	1	f	40	7	17	3000	60	65	5	N	4	N	4	N
11	4	105	2	f	40	7	17	3000	60	65	5	N	3	Y	4	N
12	4	106	3	m	30	2	22	30	10	75	10	N	4	Y	5	N
12	4	107	3	f	15	0	24	0	0	75	0	N	4	Y	5	N
12	4	108	3	f	53	2	22	10	25	75	10	N	4	Y	5	N
12	4	109	2	f	50	2	22	10	25	75	10	N	4	Y	5	N
12	4	110	2	m	5	2	22	10	30	50	10	N	5	Y	6	N
13	4	111	2	f	30	6	18	6000	120	100	20	Y	4	N	4	N
13	4	112	1	f	35	6	18	6000	120	100	20	Y	4	N	4	N
13	4	113	1	f	40	6	18	6000	120	100	20	Y	3	N	3	N
13	4	114	3	f	38	6	18	6000	120	100	20	Y	4	N	4	N
13	4	115	2	f	32	6	18	6000	120	100	20	Y	4	N	4	N
14	4	116	3	f	30	4.5	0	3000	20	150	45	N	2	N	2	Y
14	4	117	2	f	30	4.5	0	3000	20	150	45	N	2	N	2	Y
14	4	118	1	f	30	4.5	0	3000	20	150	45	N	2	N	2	Y
15	4	119	3	f	65	3.5	0	1000	180	150	100	Y	4	Y	5	N
15	4	120	1	f	40	3.5	0	1000	180	150	100	Y	4	Y	5	N
15	4	121	3	f	60	3.5	0	1000	180	150	100	Y	4	Y	5	N
15	4	122	1	f	60	3.5	0	1000	180	150	100	Y	4	Y	5	N
1	5	1	3	m	25	5	19	12000	120	150	30	N	2	Y	3	N
1	5	2	2	m	28	0	24	0	0	150	0	N	2	Y	3	N
1	5	3	3	m	20	5	19	12000	120	150	30	N	3	Y	4	N
1	5	4	4	f	28	5	19	12000	120	150	30	N	2	N	2	N
1	5	5	3	f	25	5	19	12000	120	150	30	N	2	Y	3	N
1	5	6	3	f	18	5	19	12000	120	150	30	N	4	Y	5	N
1	5	7	3	f	18	5	19	12000	120	150	30	Y	2	Y	3	N
1	5	8	2	f	18	5	19	12000	120	150	30	Y	2	Y	3	N
1	5	9	2	f	45	5	19	12000	120	150	30	N	2	Y	3	N
1	5	10	4	f	22	5	19	12000	120	150	30	N	2	Y	3	N
1	5	11	3	f	16	5	19	12000	120	150	30	N	2	Y	3	N
1	5	12	3	f	25	5	19	12000	120	150	30	N	2	Y	3	N
2	5	13	2	m	21	6	18	2000	80	210	30	N	1	Y	2	N
2	5	14	2	m	29	0	23.5	1000	25	210	30	Y	1	Y	3	N
2	5	15	NA	m	50	0	24	0	0	210	0	N	1	Y	2	N
2	5	16	1	m	30	6	18	2000	80	210	30	N	1	Y	2	N
2	5	17	2	m	16	6	18	2000	80	210	30	N	1	Y	2	N
2	5	18	1	f	22	6	18	2000	80	150	30	N	2	Y	3	N
2	5	19	NA	f	25	NA	NA	2000	80	150	30	N	1	Y	2	N
2	5	20	NA	f	22	NA	NA	2000	80	150	30	N	1	Y	2	N
2	5	21	2	f	30	6	18	2000	80	150	30	N	1	Y	2	N
2	5	22	2	f	30	0	24	0	0	150	0	N	2	Y	3	N
2	5	23	1	f	30	6	18	2000	80	150	30	N	1	Y	2	N
2	5	24	NA	f	40	NA	NA	2000	80	150	30	N	1	Y	2	N
2	5	25	3	f	30	6	18	2000	80	150	30	N	1	Y	2	N
2	5	26	1	f	34	6	18	2000	80	150	30	N	2	Y	3	N
3	5	27	3	m	45	7.5	16.5	7000	280	182	10	N	4	Y	5	Y
3	5	28	3	m	47	7.5	16.5	7000	280	210	10	N	3	Y	4	N
3	5	29	2	m	38	7.5	16.5	7000	280	182	10	N	4	Y	5	Y
3	5	30	4	m	41	0	24	0	0	140	0	N	4	Y	5	N
3	5	31	3	m	40	7.5	16.5	7000	280	210	10	N	2	Y	3	N
3	5	32	4	m	41	7.5	16.5	7000	280	140	10	N	4	Y	5	N
3	5	33	1	f	37	7.5	16.5	7000	280	182	10	N	4	Y	5	Y
3	5	34	1	f	43	7.5	16.5	7000	280	140	10	N	2	Y	3	N
3	5	35	1	f	37	0	24	0	0	182	0	N	5	Y	6	Y
3	5	36	1	f	41	7.5	16.5	7000	280	140	10	N	2	Y	3	N
3	5	37	2	f	40	7.5	16.5	7000	280	182	10	N	4	Y	5	N
3	5	38	2	f	23	0	24	0	0	182	0	N	3	Y	4	N
4	5	39	2	m	20	7.5	16.5	7000	315	100	10	N	3	Y	4	N
4	5	40	3	m	42	7.5	16.5	7000	315	100	10	N	3	Y	4	N
4	5	41	3	m	20	5	19	7000	315	100	10	N	3	Y	4	N
4	5	42	3	m	24	5	19	3000	120	100	10	N	3	Y	4	N
4	5	43	3	m	28	5	19	3000	120	100	10	N	3	Y	4	N
4	5	44	4	m	27	0	24	0	0	100	0	N	3	Y	4	N
4	5	45	2	f	45	7.5	16.5	7000	315	100	10	N	3	Y	4	N
4	5	46	2	f	40	7.5	16.5	7000	315	100	10	N	3	Y	4	N
4	5	47	2	f	35	5	19	NA	120	100	10	N	2	Y	3	N
4	5	48	2	f	42	7.5	16.5	7000	315	100	10	N	4	Y	5	N
4	5	49	3	f	30	7.5	16.5	7000	315	100	10	N	3	Y	4	N
4	5	50	1	f	20	7.5	16.5	7000	315	100	10	N	3	Y	4	N
5	5	51	1	f	46	0	0	2000	30	165	20	N	4	N	4	Y
5	5	52	1	f	33	5.5	0	2000	30	165	20	N	2	N	2	Y
5	5	53	NA	f	35	NA	0	NA	NA	165	20	N	4	N	4	Y
5	5	54	1	f	41	5	0	3000	300	165	20	Y	2	N	2	Y
5	5	55	2	f	39	5	0	3000	300	165	20	Y	2	N	2	N
5	5	56	NA	f	30	NA	NA	NA	NA	NA	NA	Y	2	N	2	N
5	5	57	1	f	31	0	0	2000	20	165	20	N	2	N	2	N
5	5	58	1	f	34	5.5	0	2000	30	165	20	N	5	N	5	Y
5	5	59	1	f	50	5.5	0	2000	30	165	20	N	5	N	5	Y
5	5	60	NA	f	29	NA	0	NA	NA	165	20	N	4	N	4	Y
5	5	61	1	f	30	5	0	3000	300	165	20	Y	2	N	2	Y
5	5	62	NA	f	40	NA	0	NA	NA	165	20	N	4	N	4	Y
5	5	63	1	f	25	0	0	2000	20	165	20	Y	2	N	2	Y
5	5	64	1	f	35	5.5	0	2000	30	165	20	N	2	N	2	Y
5	5	65	1	f	30	0	0	2000	20	165	20	N	2	N	2	Y
6	5	66	3	m	40	0	24	0	0	250	0	N	4	Y	5	N
6	5	67	NA	m	28	0	24	0	0	500	0	Y	5	Y	6	N
6	5	68	NA	m	35	0	24	0	0	250	0	N	5	Y	6	N
6	5	69	2	m	35	7	17	3000	120	250	5	N	5	Y	6	N
6	5	70	1	f	35	7	17	3000	120	200	5	N	5	Y	6	N
6	5	71	2	m	22	7	17	3000	120	200	5	N	3	Y	4	N
6	5	72	2	f	40	7	17	3000	120	90	5	Y	5	N	5	N
6	5	73	2	f	30	7	17	3000	120	180	5	Y	2	N	2	N
6	5	74	NA	f	18	0	24	0	0	200	8	N	5	Y	6	N
6	5	75	3	f	40	7	17	3000	120	200	8	Y	5	Y	6	N
6	5	76	2	f	40	7	17	3000	120	200	5	Y	2	N	2	N
6	5	77	1	f	26	7	17	3000	120	200	5	N	5	Y	6	N
6	5	78	3	m	40	0	24	0	0	200	5	N	5	Y	6	N
7	5	79	2	f	56	4	17	5000	150	12	5	Y	2	Y	3	N
7	5	80	2	f	50	4	17	5000	150	12	5	Y	2	Y	3	N
7	5	81	NA	f	50	NA	NA	NA	NA	NA	NA	Y	2	Y	3	N
7	5	82	2	f	32	4	17	5000	150	12	5	Y	2	Y	3	N
7	5	83	4	f	50	7.5	13.5	1000	30	12	5	Y	2	Y	3	N
8	5	84	2	m	20	6	18	2000	80	125	30	Y	2	Y	3	N
8	5	85	1	f	35	6	18	2000	80	125	30	Y	3	Y	4	N
8	5	86	1	f	30	6	18	2000	80	125	30	Y	3	Y	4	N
8	5	87	2	f	24	6	18	2000	80	125	30	Y	3	Y	4	N
8	5	88	2	f	25	6	18	2000	80	140	30	N	3	Y	4	N
8	5	89	1	f	18	6	18	2000	80	125	30	Y	2	Y	3	N
9	5	90	NA	m	55	NA	NA	NA	NA	300	15	Y	3	N	3	N
9	5	91	1	f	29	4.5	19.5	4000	60	200	15	Y	3	N	3	N
9	5	92	1	f	49	4.5	19.5	4000	60	200	15	Y	3	N	3	N
9	5	93	1	f	49	4.5	19.5	4000	60	200	15	Y	3	N	3	N
9	5	94	2	f	40	4.5	19.5	4000	60	200	15	Y	3	N	3	N
10	5	95	2	m	40	0	24	0	0	150	30	Y	2	Y	3	N
10	5	96	1	f	32	2	22	4000	120	120	5	Y	3	Y	4	N
10	5	97	2	f	28	2	22	4000	120	120	5	Y	3	Y	4	N
10	5	98	2	f	43	2	22	4000	120	120	5	Y	3	Y	4	N
10	5	99	NA	f	28	NA	NA	NA	NA	120	5	Y	3	Y	4	N
10	5	100	3	f	25	2	22	4000	120	100	5	Y	3	Y	4	N
11	5	101	NA	m	40	NA	NA	NA	NA	65	5	N	4	N	4	N
11	5	102	2	m	5	5	19	3000	60	65	5	N	4	N	4	N
11	5	103	3	f	60	0	24	0	0	65	0	N	4	N	4	N
11	5	104	1	f	40	5	19	3000	60	65	5	N	4	N	4	N
11	5	105	1	f	40	5	19	3000	60	65	5	N	3	Y	4	N
12	5	106	3	m	30	0	24	0	0	75	0	N	4	Y	5	N
12	5	107	2	f	15	3	21	10	25	75	10	N	4	Y	5	N
12	5	108	3	f	53	3	21	10	25	75	10	N	4	Y	5	N
12	5	109	3	f	50	3	21	10	25	75	10	N	4	Y	5	N
12	5	110	3	m	5	3	21	10	30	50	10	N	5	Y	6	N
13	5	111	1	f	30	7	17	6000	120	100	20	Y	4	N	4	N
13	5	112	1	f	35	7	17	6000	120	100	20	Y	4	N	4	N
13	5	113	1	f	40	7	17	6000	120	100	20	Y	3	N	3	N
13	5	114	3	f	38	7	17	6000	120	100	20	Y	4	N	4	N
13	5	115	2	f	32	7	17	6000	120	100	20	Y	4	N	4	N
14	5	116	3	f	30	4.5	0	3000	20	150	45	N	2	N	2	Y
14	5	117	3	f	30	4.5	0	3000	20	150	45	N	2	N	2	Y
14	5	118	1	f	30	4.5	0	3000	20	150	45	N	2	N	2	Y
15	5	119	2	f	65	3.5	0	1000	180	150	100	Y	4	Y	5	N
15	5	120	1	f	40	3.5	0	1000	180	150	100	Y	4	Y	5	N
15	5	121	3	f	60	3.5	0	1000	180	150	100	Y	4	Y	5	N
15	5	122	1	f	60	3.5	0	1000	180	150	100	Y	4	Y	5	N
1	6	1	2	m	25	7	17	12000	120	150	30	N	2	Y	3	N
1	6	2	3	m	28	0	24	12000	120	150	0	N	2	Y	3	N
1	6	3	3	m	20	7	17	12000	120	150	30	N	3	Y	4	N
1	6	4	4	f	28	0	24	0	0	150	0	N	2	N	2	N
1	6	5	3	f	25	7	17	12000	120	150	30	N	2	Y	3	N
1	6	6	2	f	18	7	17	12000	120	150	30	N	4	Y	5	N
1	6	7	1	f	18	7	17	12000	120	150	30	Y	2	Y	3	N
1	6	8	1	f	18	7	17	12000	120	150	30	Y	2	Y	3	N
1	6	9	1	f	45	7	17	12000	120	150	30	N	2	Y	3	N
1	6	10	3	f	22	7	17	12000	120	150	30	N	2	Y	3	N
1	6	11	3	f	16	7	17	12000	120	150	30	N	2	Y	3	N
1	6	12	3	f	25	7	17	12000	120	150	30	N	2	Y	3	N
2	6	13	1	m	21	4	20	2000	80	210	30	N	1	Y	2	N
2	6	14	1	m	29	0	23.5	1000	25	210	30	Y	1	Y	3	N
2	6	15	NA	m	50	0	24	0	0	210	0	N	1	Y	2	N
2	6	16	NA	m	30	0	24	0	0	210	0	N	1	Y	2	N
2	6	17	2	m	16	4	20	2000	80	210	30	N	1	Y	2	N
2	6	18	1	f	22	4	20	2000	80	150	30	N	2	Y	3	N
2	6	19	NA	f	25	NA	NA	NA	NA	150	30	N	1	Y	2	N
2	6	20	NA	f	22	NA	NA	NA	NA	150	30	N	1	Y	2	N
2	6	21	1	f	30	4	20	2000	80	150	30	N	1	Y	2	N
2	6	22	2	f	30	4	20	2000	80	150	30	N	2	Y	3	N
2	6	23	1	f	30	4	20	2000	80	150	30	N	1	Y	2	N
2	6	24	NA	f	40	4	20	NA	NA	150	30	N	1	Y	2	N
2	6	25	2	f	30	4	20	2000	80	150	30	N	1	Y	2	N
2	6	26	1	f	34	4	20	2000	80	150	30	N	2	Y	3	N
3	6	27	2	m	45	7	17	2500	100	182	10	N	4	Y	5	Y
3	6	28	2	m	47	7	17	2500	100	210	10	N	3	Y	4	N
3	6	29	2	m	38	7	17	2500	100	182	10	N	4	Y	5	Y
3	6	30	4	m	41	0	24	0	0	140	0	N	4	Y	5	N
3	6	31	3	m	40	7	17	2500	100	210	10	N	2	Y	3	N
3	6	32	3	m	41	7	17	2500	100	140	10	N	4	Y	5	N
3	6	33	1	f	37	7	17	2500	100	182	10	N	4	Y	5	Y
3	6	34	1	f	43	7	17	2500	100	140	10	N	2	Y	3	N
3	6	35	1	f	37	7	17	2500	100	182	10	N	5	Y	6	Y
3	6	36	1	f	41	7	17	2500	100	140	10	N	2	Y	3	N
3	6	37	2	f	40	7	17	2500	100	182	10	N	4	Y	5	N
3	6	38	2	f	23	0	24	0	0	182	0	N	3	Y	4	N
4	6	39	3	m	20	5.5	18.5	4000	180	100	10	N	3	Y	4	N
4	6	40	NA	m	42	NA	NA	NA	NA	NA	NA	N	3	Y	4	N
4	6	41	2	m	20	4	20	4000	180	100	10	N	3	Y	4	N
4	6	42	3	m	24	4	20	3000	120	100	10	N	3	Y	4	N
4	6	43	2	m	28	4	20	3000	120	100	10	N	3	Y	4	N
4	6	44	3	m	27	5.5	18.5	4000	180	100	10	N	3	Y	4	N
4	6	45	1	f	45	5.5	18.5	4000	180	100	10	N	3	Y	4	N
4	6	46	2	f	40	5.5	18.5	4000	180	100	10	N	3	Y	4	N
4	6	47	3	f	35	0	24	0	0	100	0	N	2	Y	3	N
4	6	48	2	f	42	0	24	0	0	100	0	N	4	Y	5	N
4	6	49	3	f	30	5.5	18.5	4000	180	100	10	N	3	Y	4	N
4	6	50	1	f	20	5.5	18.5	4000	180	100	10	N	3	Y	4	N
5	6	51	1	f	46	0	0	2000	30	165	20	N	4	N	4	Y
5	6	52	1	f	33	5.5	0	2000	30	165	20	N	2	N	2	Y
5	6	53	NA	f	35	NA	0	NA	NA	165	20	N	4	N	4	Y
5	6	54	1	f	41	5	0	3000	300	165	20	Y	2	N	2	Y
5	6	55	1	f	39	0	0	2000	20	165	20	Y	2	N	2	N
5	6	56	NA	f	30	NA	NA	NA	NA	NA	NA	Y	2	N	2	N
5	6	57	1	f	31	0	0	2000	20	165	20	N	2	N	2	N
5	6	58	1	f	34	5.5	0	2000	30	165	20	N	5	N	5	Y
5	6	59	1	f	50	5.5	0	2000	30	165	20	N	5	N	5	Y
5	6	60	NA	f	29	NA	0	NA	NA	165	20	N	4	N	4	Y
5	6	61	1	f	30	0	0	2000	20	165	20	Y	2	N	2	Y
5	6	62	NA	f	40	NA	0	NA	NA	165	20	N	4	N	4	Y
5	6	63	1	f	25	0	0	2000	20	165	20	Y	2	N	2	Y
5	6	64	1	f	35	5.5	0	2000	30	165	20	N	2	N	2	Y
5	6	65	1	f	30	0	0	2000	20	165	20	N	2	N	2	Y
6	6	66	NA	m	40	7	17	2000	80	250	5	N	4	Y	5	N
6	6	67	2	m	28	7	17	3000	120	500	5	Y	5	Y	6	N
6	6	68	2	m	35	7	17	2000	80	250	5	N	5	Y	6	N
6	6	69	2	m	35	7	17	2000	80	250	5	N	5	Y	6	N
6	6	70	1	f	35	7	17	2000	80	200	5	N	5	Y	6	N
6	6	71	2	m	22	7	17	2000	80	200	5	N	3	Y	4	N
6	6	72	1	f	40	7	17	2000	80	90	5	Y	5	N	5	N
6	6	73	2	f	30	7	17	2000	80	180	5	Y	2	N	2	N
6	6	74	NA	f	18	0	24	0	0	200	8	N	5	Y	6	N
6	6	75	2	f	40	4	20	1000	40	200	8	Y	5	Y	6	N
6	6	76	1	f	40	7	17	2000	80	200	5	Y	2	N	2	N
6	6	77	1	f	26	7	17	2000	80	200	5	N	5	Y	6	N
6	6	78	3	m	40	4	20	1000	40	200	5	N	5	Y	6	N
7	6	79	1	f	56	2	22	3000	90	12	5	Y	2	Y	3	N
7	6	80	2	f	50	2	22	3000	90	12	5	Y	2	Y	3	N
7	6	81	NA	f	50	NA	NA	NA	NA	NA	NA	Y	2	Y	3	N
7	6	82	2	f	32	2	22	3000	90	12	5	Y	2	Y	3	N
7	6	83	3	f	50	2	22	3000	90	12	5	Y	2	Y	3	N
8	6	84	3	m	20	6	18	2000	80	125	30	Y	2	Y	3	N
8	6	85	1	f	35	6	18	2000	80	125	30	Y	3	Y	4	N
8	6	86	1	f	30	6	18	2000	80	125	30	Y	3	Y	4	N
8	6	87	1	f	24	6	18	2000	80	125	30	Y	3	Y	4	N
8	6	88	1	f	25	6	18	2000	80	140	30	N	3	Y	4	N
8	6	89	1	f	18	6	18	2000	80	125	30	Y	2	Y	3	N
9	6	90	NA	m	55	NA	NA	NA	NA	300	15	Y	3	N	3	N
9	6	91	1	f	29	4.5	19.5	4000	60	200	15	Y	3	N	3	N
9	6	92	2	f	49	4.5	19.5	4000	60	200	15	Y	3	N	3	N
9	6	93	1	f	49	4.5	19.5	4000	60	200	15	Y	3	N	3	N
9	6	94	1	f	40	4.5	19.5	4000	60	200	15	Y	3	N	3	N
10	6	95	NA	m	40	0	24	0	0	150	0	Y	2	Y	3	N
10	6	96	NA	f	32	NA	NA	NA	NA	NA	NA	Y	3	Y	4	N
10	6	97	2	f	28	2	22	4000	120	120	5	Y	3	Y	4	N
10	6	98	2	f	43	2	22	4000	120	120	5	Y	3	Y	4	N
10	6	99	NA	f	28	NA	NA	NA	NA	120	5	Y	3	Y	4	N
10	6	100	2	f	25	2	22	4000	120	100	5	Y	3	Y	4	N
11	6	101	NA	m	40	NA	NA	NA	NA	65	5	N	4	N	4	N
11	6	102	1	m	5	7.5	16.5	3000	60	65	5	N	4	N	4	N
11	6	103	NA	f	60	NA	NA	NA	NA	NA	NA	N	4	N	4	N
11	6	104	1	f	40	7.5	16.5	3000	60	65	5	N	4	N	4	N
11	6	105	1	f	40	7.5	16.5	3000	60	65	5	N	3	Y	4	N
12	6	106	4	m	30	0	24	0	0	75	0	N	4	Y	5	N
12	6	107	2	f	15	3	21	10	25	75	10	N	4	Y	5	N
12	6	108	2	f	53	3	21	10	25	75	10	N	4	Y	5	N
12	6	109	NA	f	50	3	21	10	25	75	10	N	4	Y	5	N
12	6	110	2	m	5	3	21	10	30	50	10	N	5	Y	6	N
13	6	111	1	f	30	5	19	6000	120	100	20	Y	4	N	4	N
13	6	112	2	f	35	5	19	0	0	100	20	Y	4	N	4	N
13	6	113	1	f	40	5	19	6000	120	100	20	Y	3	N	3	N
13	6	114	3	f	38	5	19	6000	120	100	20	Y	4	N	4	N
13	6	115	NA	f	32	0	24	0	0	100	0	Y	4	N	4	N
14	6	116	4	f	30	4.5	0	3000	20	150	45	N	2	N	2	Y
14	6	117	3	f	30	4.5	0	3000	20	150	45	N	2	N	2	Y
14	6	118	1	f	30	4.5	0	3000	20	150	45	N	2	N	2	Y
15	6	119	2	f	65	3.5	0	1000	180	150	100	Y	4	Y	5	N
15	6	120	1	f	40	3.5	0	1000	180	150	100	Y	4	Y	5	N
15	6	121	3	f	60	3.5	0	1000	180	150	100	Y	4	Y	5	N
15	6	122	1	f	60	3.5	0	1000	180	150	100	Y	4	Y	5	N

## Sheet: Table 7
Camp	Time of examination	Elephant ID	Foot Score	Sex	Age	Work Hour	Chain Hour	Walk Distance Day	Walk Time Day	Floor Day	Floor Night	Floor Work	Hill
1	1	1	2	m	25	4.5	19.5	6000	60	Ground	Ground	Mix	Y
1	1	2	2	m	28	4.5	19.5	6000	60	Ground	Ground	Mix	Y
1	1	3	2	m	20	4.5	19.5	6000	60	Ground	Ground	Mix	Y
1	1	4	1	f	28	4.5	19.5	6000	60	Ground	Ground	Mix	Y
1	1	5	1	f	25	4.5	19.5	6000	60	Ground	Ground	Mix	Y
1	1	6	1	f	18	4.5	19.5	6000	60	Ground	Ground	Mix	Y
1	1	7	1	f	18	4.5	19.5	6000	60	Ground	Ground	Mix	Y
1	1	8	3	f	18	4.5	19.5	6000	60	Ground	Ground	Ground	N
1	1	9	2	f	45	4.5	19.5	6000	60	Ground	Ground	Mix	Y
1	1	10	1	f	22	4.5	19.5	6000	60	Ground	Ground	Mix	Y
1	1	11	2	f	16	4.5	19.5	0	0	Ground	Ground	Mix	Y
1	1	12	NA	f	25	4.5	19.5	6000	60	Ground	Ground	Mix	Y
2	1	13	2	m	21	4.5	19.5	2000	80	Concrete	Ground	Mix	Y
2	1	14	1	m	29	0	23.5	1000	25	Ground	Ground	Mix	Y
2	1	15	3	m	50	4.5	19.5	2000	80	Concrete	Ground	Mix	Y
2	1	16	2	m	30	4.5	19.5	2000	80	Ground	Ground	Mix	Y
2	1	17	2	m	16	4.5	19.5	2000	80	Concrete	Concrete	Mix	Y
2	1	18	3	f	22	4.5	19.5	2000	80	Concrete	Concrete	Mix	Y
2	1	19	2	f	25	4.5	19.5	2000	80	Concrete	Concrete	Mix	Y
2	1	20	2	f	22	4.5	19.5	2000	80	Ground	Ground	Mix	Y
2	1	21	3	f	30	4.5	19.5	2000	80	Concrete	Concrete	Mix	Y
2	1	22	1	f	30	4.5	19.5	2000	80	Concrete	Concrete	Mix	Y
2	1	23	2	f	30	4.5	19.5	2000	80	Concrete	Concrete	Mix	Y
2	1	24	0	f	40	4.5	19.5	2000	80	Ground	Ground	Mix	Y
2	1	25	NA	f	30	NA	NA	NA	NA	Concrete	Concrete	Mix	Y
2	1	26	NA	f	34	NA	NA	NA	NA	Concrete	Concrete	Mix	Y
3	1	27	2	m	45	7	17	6500	260	Concrete	Concrete	Mix	Y
3	1	28	1	m	47	7	17	6500	260	Concrete	Concrete	Mix	Y
3	1	29	1	m	38	7	17	6500	260	Concrete	Concrete	Mix	Y
3	1	30	1	m	41	7	17	6500	260	Concrete	Concrete	Mix	Y
3	1	31	2	m	40	7	17	6500	260	Concrete	Concrete	Mix	Y
3	1	32	2	m	41	5	19	6500	260	Concrete	Concrete	Mix	Y
3	1	33	3	f	37	7	17	6500	260	Concrete	Concrete	Mix	Y
3	1	34	2	f	43	7	17	6500	260	Concrete	Concrete	Mix	Y
3	1	35	1	f	37	7	17	6500	260	Concrete	Concrete	Mix	Y
3	1	36	1	f	41	7	17	6500	260	Concrete	Concrete	Mix	Y
3	1	37	2	f	40	7	17	6500	260	Concrete	Concrete	Mix	Y
3	1	38	2	f	23	7	17	6500	260	Concrete	Concrete	Mix	Y
4	1	39	3	m	20	8	16	10000	450	Concrete	Concrete	Mix	Y
4	1	40	2	m	42	8	16	10000	450	Concrete	Concrete	Mix	Y
4	1	41	2	m	20	0	24	0	0	Concrete	Concrete	Mix	Y
4	1	42	NA	m	24	0	24	0	0	Concrete	Concrete	Ground	N
4	1	43	1	m	28	7	17	4000	160	Concrete	Concrete	Ground	N
4	1	44	2	m	27	8	16	10000	450	Concrete	Concrete	Mix	Y
4	1	45	NA	f	45	8	16	10000	450	Concrete	Concrete	Mix	Y
4	1	46	2	f	40	8	16	10000	450	Concrete	Concrete	Mix	Y
4	1	47	NA	f	35	8	16	10000	450	Concrete	Concrete	Ground	N
4	1	48	3	f	42	8	16	10000	450	Concrete	Concrete	Mix	Y
4	1	49	1	f	30	8	16	10000	450	Concrete	Concrete	Mix	Y
4	1	50	2	f	20	8	16	10000	450	Concrete	Concrete	Mix	Y
5	1	51	2	f	46	0	0	2000	30	Ground	Sand	Ground	N
5	1	52	0	f	33	5.5	0	2000	30	Ground	Sand	Ground	N
5	1	53	2	f	35	5.5	0	2000	30	Ground	Sand	Ground	N
5	1	54	3	f	41	5	0	3000	300	Ground	Sand	Ground	Y
5	1	55	2	f	39	5	0	3000	300	Ground	Sand	Ground	Y
5	1	56	3	f	30	5	0	3000	300	Ground	Sand	Ground	Y
5	1	57	3	f	31	0	0	2000	20	Ground	Sand	Ground	Y
5	1	58	3	f	34	5.5	0	2000	30	Ground	Sand	Ground	N
5	1	59	2	f	50	5.5	0	2000	30	Ground	Sand	Ground	N
5	1	60	2	f	29	5.5	0	2000	30	Ground	Sand	Ground	N
5	1	61	3	f	30	5	0	3000	300	Ground	Sand	Ground	Y
5	1	62	3	f	40	5.5	0	2000	30	Ground	Sand	Ground	N
5	1	63	NA	f	25	NA	NA	NA	NA	Ground	Sand	Ground	N
5	1	64	NA	f	35	NA	NA	NA	NA	Ground	Sand	Ground	N
5	1	65	NA	f	30	NA	NA	NA	NA	Ground	Sand	Ground	N
6	1	66	3	m	40	0	24	0	0	Ground	Ground	Mix	Y
6	1	67	NA	m	28	0	24	0	0	Ground	Ground	Ground	N
6	1	68	3	m	35	7	17	8000	320	Ground	Ground	Mix	Y
6	1	69	3	m	35	0	24	0	0	Ground	Ground	Mix	Y
6	1	70	3	f	35	7	17	8000	320	Ground	Ground	Mix	Y
6	1	71	NA	m	22	0	24	0	0	Concrete	Ground	Mix	Y
6	1	72	2	f	40	7	17	8000	320	Ground	Ground	Mix	Y
6	1	73	1	f	30	7	17	8000	320	Ground	Ground	Mix	Y
6	1	74	NA	f	18	4	20	5000	200	Ground	Ground	Mix	Y
6	1	75	2	f	40	4	20	5000	200	Concrete	Ground	Mix	Y
6	1	76	1	f	40	7	17	8000	320	Ground	Ground	Mix	Y
6	1	77	3	f	26	7	17	8000	320	Concrete	Ground	Mix	Y
6	1	78	NA	m	40	NA	NA	NA	NA	Ground	Ground	Ground	N
7	1	79	1	f	56	5	16	3000	90	Concrete	Concrete	Mix	N
7	1	80	1	f	50	5	16	3000	90	Concrete	Concrete	Mix	N
7	1	81	2	f	50	5	16	3000	90	Concrete	Concrete	Mix	N
7	1	82	2	f	32	5	16	3000	90	Concrete	Concrete	Mix	N
7	1	83	NA	f	50	NA	NA	NA	NA	Concrete	Concrete	Mix	N
8	1	84	2	m	20	7.5	16.5	2000	80	Ground	Ground	Ground	Y
8	1	85	1	f	35	7.5	16.5	2000	80	Concrete	Concrete	Ground	Y
8	1	86	1	f	30	7.5	16.5	2000	80	Concrete	Concrete	Ground	Y
8	1	87	3	f	24	7.5	16.5	2000	80	Concrete	Concrete	Ground	Y
8	1	88	3	f	25	7.5	16.5	2000	80	Concrete	Concrete	Ground	Y
8	1	89	3	f	18	7.5	16.5	2000	80	Ground	Ground	Ground	Y
9	1	90	1	m	55	2	22	4000	60	Ground	Ground	Ground	Y
9	1	91	1	f	29	2	22	4000	60	Ground	Ground	Ground	Y
9	1	92	1	f	49	2	22	4000	60	Ground	Ground	Ground	Y
9	1	93	1	f	49	2	22	4000	60	Ground	Ground	Ground	Y
9	1	94	NA	f	40	NA	NA	NA	NA	Ground	Ground	Ground	Y
10	1	95	NA	m	40	0	24	0	0	Ground	Ground	Mix	Y
10	1	96	1	f	32	7	17	8000	240	Ground	Ground	Mix	Y
10	1	97	2	f	28	7	17	8000	240	Ground	Ground	Mix	Y
10	1	98	2	f	43	7	17	8000	240	Ground	Ground	Mix	Y
10	1	99	3	f	28	7	17	8000	240	Ground	Ground	Mix	Y
10	1	100	3	f	25	7	17	8000	240	Ground	Ground	Mix	Y
11	1	101	2	m	40	6	18	0	0	Ground	Ground	Ground	N
11	1	102	3	m	5	6	18	3000	60	Ground	Ground	Ground	N
11	1	103	2	f	60	6	18	3000	60	Ground	Ground	Ground	N
11	1	104	3	f	40	6	18	3000	60	Ground	Ground	Ground	N
11	1	105	2	f	40	6	18	3000	60	Ground	Ground	Ground	N
12	1	106	3	m	30	1	23	30	10	Concrete	Concrete	Ground	N
12	1	107	3	f	15	1	23	10	25	Concrete	Concrete	Ground	N
12	1	108	2	f	53	1	23	10	25	Concrete	Concrete	Ground	N
12	1	109	3	f	50	1	23	10	25	Concrete	Ground	Ground	N
12	1	110	3	m	5	1	23	10	30	Concrete	Concrete	Ground	N
13	1	111	3	f	30	7	17	6000	120	Concrete	Concrete	Mix	Y
13	1	112	3	f	35	7	17	6000	120	Concrete	Concrete	Mix	Y
13	1	113	1	f	40	7	17	6000	120	Concrete	Concrete	Mix	Y
13	1	114	3	f	38	7	17	6000	120	Concrete	Concrete	Mix	Y
13	1	115	3	f	32	7	17	6000	120	Concrete	Concrete	Mix	Y
14	1	116	1	f	30	4.5	0	3000	120	Ground	Concrete	Mix	Y
14	1	117	3	f	30	4.5	0	3000	120	Ground	Concrete	Mix	Y
14	1	118	1	f	30	4.5	0	3000	120	Ground	Concrete	Mix	Y
15	1	119	2	f	65	3.5	0	1000	180	Ground	Sand	Ground	Y
15	1	120	1	f	40	3.5	0	1000	180	Ground	Sand	Ground	Y
15	1	121	2	f	60	3.5	0	1000	180	Ground	Sand	Ground	Y
15	1	122	2	f	60	3.5	0	1000	180	Ground	Sand	Ground	Y
1	2	1	NA	m	25	NA	NA	12000	120	Ground	Ground	Mix	Y
1	2	2	2	m	28	7	17	12000	120	Ground	Ground	Mix	Y
1	2	3	1	m	20	7	17	12000	120	Ground	Ground	Mix	Y
1	2	4	2	f	28	7	17	12000	120	Ground	Ground	Mix	Y
1	2	5	2	f	25	7	17	12000	120	Ground	Ground	Mix	Y
1	2	6	1	f	18	7	17	12000	120	Ground	Ground	Mix	Y
1	2	7	2	f	18	7	17	12000	120	Ground	Ground	Mix	Y
1	2	8	3	f	18	7	17	12000	120	Ground	Ground	Ground	N
1	2	9	3	f	45	7	17	12000	120	Ground	Ground	Mix	Y
1	2	10	1	f	22	7	17	12000	120	Ground	Ground	Mix	Y
1	2	11	1	f	16	7	17	12000	120	Ground	Ground	Mix	Y
1	2	12	2	f	25	7	17	12000	120	Ground	Ground	Mix	Y
2	2	13	3	m	21	1	23	1000	40	Concrete	Ground	Mix	Y
2	2	14	2	m	29	0	23.5	1000	25	Ground	Ground	Mix	Y
2	2	15	3	m	50	1	23	1000	40	Concrete	Ground	Mix	Y
2	2	16	2	m	30	1	23	1000	40	Ground	Ground	Mix	Y
2	2	17	2	m	16	1	23	1000	40	Concrete	Concrete	Mix	Y
2	2	18	3	f	22	1	23	1000	40	Concrete	Concrete	Mix	Y
2	2	19	2	f	25	1	23	1000	40	Concrete	Concrete	Mix	Y
2	2	20	NA	f	22	NA	NA	NA	NA	Ground	Ground	Mix	Y
2	2	21	3	f	30	1	23	1000	40	Concrete	Concrete	Mix	Y
2	2	22	1	f	30	1	23	1000	40	Concrete	Concrete	Mix	Y
2	2	23	2	f	30	1	23	1000	40	Concrete	Concrete	Mix	Y
2	2	24	3	f	40	0	24	1000	40	Ground	Ground	Mix	Y
2	2	25	2	f	30	1	23	1000	40	Concrete	Concrete	Mix	Y
2	2	26	NA	f	34	NA	NA	NA	NA	Concrete	Concrete	Mix	Y
3	2	27	3	m	45	6	18	2500	100	Concrete	Concrete	Mix	Y
3	2	28	2	m	47	6	18	2500	100	Concrete	Concrete	Mix	Y
3	2	29	1	m	38	6	18	2500	100	Concrete	Concrete	Mix	Y
3	2	30	NA	m	41	0	24	0	0	Concrete	Concrete	Mix	Y
3	2	31	1	m	40	6	18	2500	100	Concrete	Concrete	Mix	Y
3	2	32	2	m	41	6	18	2500	100	Concrete	Concrete	Mix	Y
3	2	33	2	f	37	6	18	2500	100	Concrete	Concrete	Mix	Y
3	2	34	2	f	43	6	18	2500	100	Concrete	Concrete	Mix	Y
3	2	35	1	f	37	6	18	2500	100	Concrete	Concrete	Mix	Y
3	2	36	3	f	41	6	18	2500	100	Concrete	Concrete	Mix	Y
3	2	37	2	f	40	6	18	2500	100	Concrete	Concrete	Mix	Y
3	2	38	3	f	23	6	18	2500	100	Concrete	Concrete	Mix	Y
4	2	39	2	m	20	6	18	3000	135	Concrete	Concrete	Mix	Y
4	2	40	1	m	42	6	18	3000	135	Concrete	Concrete	Mix	Y
4	2	41	3	m	20	6	18	3000	135	Concrete	Concrete	Mix	Y
4	2	42	3	m	24	6	18	3000	120	Concrete	Concrete	Ground	N
4	2	43	1	m	28	6	18	3000	120	Concrete	Concrete	Ground	N
4	2	44	NA	m	27	0	24	0	0	Concrete	Concrete	Mix	Y
4	2	45	3	f	45	6	18	3000	135	Concrete	Concrete	Mix	Y
4	2	46	2	f	40	6	18	3000	135	Concrete	Concrete	Mix	Y
4	2	47	2	f	35	6	18	3000	135	Concrete	Concrete	Ground	N
4	2	48	2	f	42	6	18	3000	135	Concrete	Concrete	Mix	Y
4	2	49	2	f	30	6	18	3000	135	Concrete	Concrete	Mix	Y
4	2	50	2	f	20	6	18	3000	135	Concrete	Concrete	Mix	Y
5	2	51	2	f	46	0	0	2000	30	Ground	Sand	Ground	N
5	2	52	3	f	33	5.5	0	2000	30	Ground	Sand	Ground	N
5	2	53	NA	f	35	NA	0	NA	NA	Ground	Sand	Ground	N
5	2	54	3	f	41	5	0	3000	300	Ground	Sand	Ground	Y
5	2	55	2	f	39	5	0	3000	300	Ground	Sand	Ground	Y
5	2	56	3	f	30	5	0	3000	300	Ground	Sand	Ground	Y
5	2	57	1	f	31	0	0	2000	20	Ground	Sand	Ground	Y
5	2	58	3	f	34	5.5	0	2000	30	Ground	Sand	Ground	N
5	2	59	2	f	50	5.5	0	2000	30	Ground	Sand	Ground	N
5	2	60	NA	f	29	NA	0	NA	NA	Ground	Sand	Ground	N
5	2	61	3	f	30	5	0	3000	300	Ground	Sand	Ground	Y
5	2	62	NA	f	40	NA	0	NA	NA	Ground	Sand	Ground	N
5	2	63	1	f	25	0	0	2000	20	Ground	Sand	Ground	N
5	2	64	1	f	35	5.5	0	2000	30	Ground	Sand	Ground	N
5	2	65	2	f	30	0	0	2000	20	Ground	Sand	Ground	N
6	2	66	3	m	40	0	24	0	0	Ground	Ground	Mix	Y
6	2	67	1	m	28	7	17	3000	120	Ground	Ground	Ground	N
6	2	68	3	m	35	7	17	4000	160	Ground	Ground	Mix	Y
6	2	69	3	m	35	7	17	4000	160	Ground	Ground	Mix	Y
6	2	70	2	f	35	7	17	4000	160	Ground	Ground	Mix	Y
6	2	71	3	m	22	7	17	4000	160	Concrete	Ground	Mix	Y
6	2	72	1	f	40	7	17	4000	160	Ground	Ground	Mix	Y
6	2	73	2	f	30	7	17	4000	160	Ground	Ground	Mix	Y
6	2	74	NA	f	18	4	20	1500	60	Ground	Ground	Mix	Y
6	2	75	3	f	40	0	24	0	0	Concrete	Ground	Mix	Y
6	2	76	1	f	40	7	17	4000	160	Ground	Ground	Mix	Y
6	2	77	NA	f	26	NA	NA	NA	NA	Concrete	Ground	Mix	Y
6	2	78	NA	m	40	NA	NA	NA	NA	Ground	Ground	Ground	N
7	2	79	1	f	56	4.5	16.5	3000	90	Concrete	Concrete	Mix	N
7	2	80	0	f	50	4.5	16.5	3000	90	Concrete	Concrete	Mix	N
7	2	81	NA	f	50	NA	NA	NA	NA	Concrete	Concrete	Mix	N
7	2	82	3	f	32	4.5	16.5	3000	90	Concrete	Concrete	Mix	N
7	2	83	2	f	50	4.5	16.5	3000	90	Concrete	Concrete	Mix	N
8	2	84	2	m	20	8	16	2000	80	Ground	Ground	Ground	Y
8	2	85	1	f	35	8	16	2000	80	Concrete	Concrete	Ground	Y
8	2	86	2	f	30	8	16	2000	80	Concrete	Concrete	Ground	Y
8	2	87	2	f	24	8	16	2000	80	Concrete	Concrete	Ground	Y
8	2	88	2	f	25	8	16	2000	80	Concrete	Concrete	Ground	Y
8	2	89	3	f	18	8	16	2000	80	Ground	Ground	Ground	Y
9	2	90	2	m	55	2	22	4000	60	Ground	Ground	Ground	Y
9	2	91	3	f	29	2	22	4000	60	Ground	Ground	Ground	Y
9	2	92	3	f	49	2	22	4000	60	Ground	Ground	Ground	Y
9	2	93	1	f	49	2	22	4000	60	Ground	Ground	Ground	Y
9	2	94	3	f	40	2	22	4000	60	Ground	Ground	Ground	Y
10	2	95	0	m	40	9	15	12000	360	Ground	Ground	Mix	Y
10	2	96	1	f	32	9	15	12000	360	Ground	Ground	Mix	Y
10	2	97	3	f	28	9	15	12000	360	Ground	Ground	Mix	Y
10	2	98	3	f	43	9	15	12000	360	Ground	Ground	Mix	Y
10	2	99	NA	f	28	NA	NA	NA	NA	Ground	Ground	Mix	Y
10	2	100	3	f	25	9	15	12000	360	Ground	Ground	Mix	Y
11	2	101	2	m	40	7	17	1000	20	Ground	Ground	Ground	N
11	2	102	NA	m	5	NA	NA	NA	NA	Ground	Ground	Ground	N
11	2	103	3	f	60	7	17	1000	20	Ground	Ground	Ground	N
11	2	104	3	f	40	7	17	1000	20	Ground	Ground	Ground	N
11	2	105	2	f	40	7	17	1000	20	Ground	Ground	Ground	N
12	2	106	3	m	30	3	21	30	10	Concrete	Concrete	Ground	N
12	2	107	3	f	15	3	21	10	25	Concrete	Concrete	Ground	N
12	2	108	2	f	53	3	21	10	25	Concrete	Concrete	Ground	N
12	2	109	3	f	50	3	21	10	25	Concrete	Ground	Ground	N
12	2	110	3	m	5	3	21	10	30	Concrete	Concrete	Ground	N
13	2	111	3	f	30	6.5	17.5	6000	120	Concrete	Concrete	Mix	Y
13	2	112	3	f	35	6.5	17.5	6000	120	Concrete	Concrete	Mix	Y
13	2	113	2	f	40	6.5	17.5	6000	120	Concrete	Concrete	Mix	Y
13	2	114	0	f	38	6.5	17.5	6000	120	Concrete	Concrete	Mix	Y
13	2	115	3	f	32	6.5	17.5	6000	120	Concrete	Concrete	Mix	Y
14	2	116	1	f	30	4.5	0	3000	120	Ground	Concrete	Mix	Y
14	2	117	1	f	30	4.5	0	3000	120	Ground	Concrete	Mix	Y
14	2	118	0	f	30	4.5	0	3000	120	Ground	Concrete	Mix	Y
15	2	119	2	f	65	3.5	0	1000	180	Ground	Sand	Ground	Y
15	2	120	3	f	40	3.5	0	1000	180	Ground	Sand	Ground	Y
15	2	121	2	f	60	3.5	0	1000	180	Ground	Sand	Ground	Y
15	2	122	3	f	60	3.5	0	1000	180	Ground	Sand	Ground	Y
1	3	1	2	m	25	8.5	15.5	12000	120	Ground	Ground	Mix	Y
1	3	2	1	m	28	8.5	15.5	12000	120	Ground	Ground	Mix	Y
1	3	3	2	m	20	8.5	15.5	12000	120	Ground	Ground	Mix	Y
1	3	4	2	f	28	8.5	15.5	12000	120	Ground	Ground	Mix	Y
1	3	5	2	f	25	8.5	15.5	12000	120	Ground	Ground	Mix	Y
1	3	6	1	f	18	8.5	15.5	12000	120	Ground	Ground	Mix	Y
1	3	7	2	f	18	8.5	15.5	12000	120	Ground	Ground	Mix	Y
1	3	8	3	f	18	8.5	15.5	12000	120	Ground	Ground	Ground	N
1	3	9	1	f	45	8.5	15.5	12000	120	Ground	Ground	Mix	Y
1	3	10	1	f	22	8.5	15.5	12000	120	Ground	Ground	Mix	Y
1	3	11	2	f	16	8.5	15.5	12000	120	Ground	Ground	Mix	Y
1	3	12	1	f	25	8.5	15.5	12000	120	Ground	Ground	Mix	Y
2	3	13	3	m	21	4	20	2000	80	Concrete	Ground	Mix	Y
2	3	14	2	m	29	0	23.5	1000	25	Ground	Ground	Mix	Y
2	3	15	1	m	50	4	20	2000	80	Concrete	Ground	Mix	Y
2	3	16	2	m	30	4	20	2000	80	Ground	Ground	Mix	Y
2	3	17	2	m	16	4	20	2000	80	Concrete	Concrete	Mix	Y
2	3	18	2	f	22	4	20	2000	80	Concrete	Concrete	Mix	Y
2	3	19	2	f	25	4	20	2000	80	Concrete	Concrete	Mix	Y
2	3	20	NA	f	22	NA	NA	NA	NA	Ground	Ground	Mix	Y
2	3	21	3	f	30	4	20	2000	80	Concrete	Concrete	Mix	Y
2	3	22	2	f	30	4	20	2000	80	Concrete	Concrete	Mix	Y
2	3	23	2	f	30	4	20	2000	80	Concrete	Concrete	Mix	Y
2	3	24	NA	f	40	NA	NA	NA	NA	Ground	Ground	Mix	Y
2	3	25	2	f	30	4	20	2000	80	Concrete	Concrete	Mix	Y
2	3	26	1	f	34	4	20	2000	80	Concrete	Concrete	Mix	Y
3	3	27	2	m	45	7	17	3500	140	Concrete	Concrete	Mix	Y
3	3	28	2	m	47	0	24	0	0	Concrete	Concrete	Mix	Y
3	3	29	2	m	38	7	17	3500	140	Concrete	Concrete	Mix	Y
3	3	30	1	m	41	7	17	3500	140	Concrete	Concrete	Mix	Y
3	3	31	1	m	40	7	17	3500	140	Concrete	Concrete	Mix	Y
3	3	32	0	m	41	7	17	3500	140	Concrete	Concrete	Mix	Y
3	3	33	2	f	37	0	24	0	0	Concrete	Concrete	Mix	Y
3	3	34	3	f	43	7	17	3500	140	Concrete	Concrete	Mix	Y
3	3	35	2	f	37	7	17	3500	140	Concrete	Concrete	Mix	Y
3	3	36	2	f	41	7	17	3500	140	Concrete	Concrete	Mix	Y
3	3	37	2	f	40	7	17	3500	140	Concrete	Concrete	Mix	Y
3	3	38	2	f	23	7	17	3500	140	Concrete	Concrete	Mix	Y
4	3	39	3	m	20	6.5	17.5	3000	135	Concrete	Concrete	Mix	Y
4	3	40	2	m	42	6.5	17.5	3000	135	Concrete	Concrete	Mix	Y
4	3	41	3	m	20	6.5	17.5	3000	135	Concrete	Concrete	Mix	Y
4	3	42	2	m	24	6.5	17.5	4000	160	Concrete	Concrete	Ground	N
4	3	43	1	m	28	6.5	17.5	5000	200	Concrete	Concrete	Ground	N
4	3	44	2	m	27	0	24	0	0	Concrete	Concrete	Mix	Y
4	3	45	3	f	45	6.5	17.5	3000	135	Concrete	Concrete	Mix	Y
4	3	46	2	f	40	6.5	17.5	3000	135	Concrete	Concrete	Mix	Y
4	3	47	2	f	35	6.5	17.5	3000	135	Concrete	Concrete	Ground	N
4	3	48	3	f	42	6.5	17.5	3000	135	Concrete	Concrete	Mix	Y
4	3	49	3	f	30	6.5	17.5	3000	135	Concrete	Concrete	Mix	Y
4	3	50	1	f	20	6.5	17.5	3000	135	Concrete	Concrete	Mix	Y
5	3	51	2	f	46	0	0	2000	30	Ground	Sand	Ground	N
5	3	52	2	f	33	5.5	0	2000	30	Ground	Sand	Ground	N
5	3	53	NA	f	35	NA	0	NA	NA	Ground	Sand	Ground	N
5	3	54	3	f	41	5	0	3000	300	Ground	Sand	Ground	Y
5	3	55	2	f	39	5	0	3000	300	Ground	Sand	Ground	Y
5	3	56	NA	f	30	NA	NA	NA	NA	Ground	Sand	Ground	Y
5	3	57	1	f	31	0	0	2000	20	Ground	Sand	Ground	Y
5	3	58	3	f	34	5.5	0	2000	30	Ground	Sand	Ground	N
5	3	59	2	f	50	5.5	0	2000	30	Ground	Sand	Ground	N
5	3	60	NA	f	29	NA	0	NA	NA	Ground	Sand	Ground	N
5	3	61	3	f	30	5	0	3000	300	Ground	Sand	Ground	Y
5	3	62	NA	f	40	NA	0	NA	NA	Ground	Sand	Ground	N
5	3	63	3	f	25	0	0	2000	20	Ground	Sand	Ground	N
5	3	64	1	f	35	5.5	0	2000	30	Ground	Sand	Ground	N
5	3	65	3	f	30	0	0	2000	20	Ground	Sand	Ground	N
6	3	66	2	m	40	0	24	0	0	Ground	Ground	Mix	Y
6	3	67	2	m	28	6.5	17.5	3000	120	Ground	Ground	Ground	N
6	3	68	2	m	35	6.5	17.5	6500	260	Ground	Ground	Mix	Y
6	3	69	3	m	35	6.5	17.5	6500	260	Ground	Ground	Mix	Y
6	3	70	NA	f	35	3.5	20.5	5000	200	Ground	Ground	Mix	Y
6	3	71	2	m	22	0	24	0	0	Concrete	Ground	Mix	Y
6	3	72	3	f	40	6.5	17.5	6500	260	Ground	Ground	Mix	Y
6	3	73	3	f	30	6.5	17.5	6500	260	Ground	Ground	Mix	Y
6	3	74	NA	f	18	3.5	20.5	5000	200	Ground	Ground	Mix	Y
6	3	75	3	f	40	2	22	3000	120	Concrete	Ground	Mix	Y
6	3	76	1	f	40	6.5	17.5	6500	260	Ground	Ground	Mix	Y
6	3	77	3	f	26	6.5	17.5	6500	260	Concrete	Ground	Mix	Y
6	3	78	NA	m	40	NA	NA	NA	NA	Ground	Ground	Ground	N
7	3	79	2	f	56	5	16	3000	90	Concrete	Concrete	Mix	N
7	3	80	0	f	50	5	16	3000	90	Concrete	Concrete	Mix	N
7	3	81	NA	f	50	NA	NA	NA	NA	Concrete	Concrete	Mix	N
7	3	82	3	f	32	5	16	3000	90	Concrete	Concrete	Mix	N
7	3	83	2	f	50	0	21	3000	90	Concrete	Concrete	Mix	N
8	3	84	2	m	20	6	18	2000	80	Ground	Ground	Ground	Y
8	3	85	1	f	35	6	18	2000	80	Concrete	Concrete	Ground	Y
8	3	86	2	f	30	6	18	2000	80	Concrete	Concrete	Ground	Y
8	3	87	3	f	24	6	18	2000	80	Concrete	Concrete	Ground	Y
8	3	88	2	f	25	6	18	2000	80	Concrete	Concrete	Ground	Y
8	3	89	2	f	18	6	18	2000	80	Ground	Ground	Ground	Y
9	3	90	3	m	55	5	19	4000	60	Ground	Ground	Ground	Y
9	3	91	2	f	29	5	19	4000	60	Ground	Ground	Ground	Y
9	3	92	2	f	49	5	19	4000	60	Ground	Ground	Ground	Y
9	3	93	1	f	49	5	19	4000	60	Ground	Ground	Ground	Y
9	3	94	3	f	40	5	19	4000	60	Ground	Ground	Ground	Y
10	3	95	2	m	40	9	15	8000	240	Ground	Ground	Mix	Y
10	3	96	2	f	32	9	15	8000	240	Ground	Ground	Mix	Y
10	3	97	3	f	28	9	15	8000	240	Ground	Ground	Mix	Y
10	3	98	3	f	43	9	15	8000	240	Ground	Ground	Mix	Y
10	3	99	NA	f	28	NA	NA	NA	NA	Ground	Ground	Mix	Y
10	3	100	2	f	25	9	15	8000	240	Ground	Ground	Mix	Y
11	3	101	2	m	40	4.5	19.5	3000	60	Ground	Ground	Ground	N
11	3	102	3	m	5	4.5	19.5	3000	60	Ground	Ground	Ground	N
11	3	103	3	f	60	0	24	0	0	Ground	Ground	Ground	N
11	3	104	3	f	40	4.5	19.5	3000	60	Ground	Ground	Ground	N
11	3	105	1	f	40	4.5	19.5	3000	60	Ground	Ground	Ground	N
12	3	106	3	m	30	3	21	30	10	Concrete	Concrete	Ground	N
12	3	107	3	f	15	3	21	10	25	Concrete	Concrete	Ground	N
12	3	108	2	f	53	3	21	10	25	Concrete	Concrete	Ground	N
12	3	109	3	f	50	3	21	10	25	Concrete	Ground	Ground	N
12	3	110	3	m	5	3	21	10	30	Concrete	Concrete	Ground	N
13	3	111	3	f	30	6	18	6000	120	Concrete	Concrete	Mix	Y
13	3	112	3	f	35	6	18	6000	120	Concrete	Concrete	Mix	Y
13	3	113	3	f	40	6	18	6000	120	Concrete	Concrete	Mix	Y
13	3	114	1	f	38	6	18	6000	120	Concrete	Concrete	Mix	Y
13	3	115	3	f	32	6	18	6000	120	Concrete	Concrete	Mix	Y
14	3	116	2	f	30	4.5	0	3000	120	Ground	Concrete	Mix	Y
14	3	117	3	f	30	4.5	0	3000	120	Ground	Concrete	Mix	Y
14	3	118	2	f	30	4.5	0	3000	120	Ground	Concrete	Mix	Y
15	3	119	2	f	65	3.5	0	1000	180	Ground	Sand	Ground	Y
15	3	120	3	f	40	3.5	0	1000	180	Ground	Sand	Ground	Y
15	3	121	1	f	60	3.5	0	1000	180	Ground	Sand	Ground	Y
15	3	122	3	f	60	3.5	0	1000	180	Ground	Sand	Ground	Y
1	4	1	2	m	25	7	17	12000	120	Ground	Ground	Mix	Y
1	4	2	1	m	28	7	17	12000	120	Ground	Ground	Mix	Y
1	4	3	3	m	20	7	17	12000	120	Ground	Ground	Mix	Y
1	4	4	3	f	28	7	17	12000	120	Ground	Ground	Mix	Y
1	4	5	1	f	25	7	17	12000	120	Ground	Ground	Mix	Y
1	4	6	3	f	18	7	17	12000	120	Ground	Ground	Mix	Y
1	4	7	2	f	18	7	17	12000	120	Ground	Ground	Mix	Y
1	4	8	2	f	18	7	17	12000	120	Ground	Ground	Ground	N
1	4	9	3	f	45	7	17	12000	120	Ground	Ground	Mix	Y
1	4	10	2	f	22	7	17	12000	120	Ground	Ground	Mix	Y
1	4	11	3	f	16	7	17	12000	120	Ground	Ground	Mix	Y
1	4	12	1	f	25	7	17	12000	120	Ground	Ground	Mix	Y
2	4	13	3	m	21	4.5	19.5	2000	80	Concrete	Ground	Mix	Y
2	4	14	3	m	29	0	23.5	1000	25	Ground	Ground	Mix	Y
2	4	15	NA	m	50	0	24	0	0	Concrete	Ground	Mix	Y
2	4	16	2	m	30	4.5	19.5	2000	80	Ground	Ground	Mix	Y
2	4	17	2	m	16	4.5	19.5	2000	80	Concrete	Concrete	Mix	Y
2	4	18	2	f	22	4.5	19.5	2000	80	Concrete	Concrete	Mix	Y
2	4	19	NA	f	25	NA	NA	NA	NA	Concrete	Concrete	Mix	Y
2	4	20	NA	f	22	NA	NA	NA	NA	Ground	Ground	Mix	Y
2	4	21	3	f	30	4.5	19.5	2000	80	Concrete	Concrete	Mix	Y
2	4	22	2	f	30	4.5	19.5	2000	80	Concrete	Concrete	Mix	Y
2	4	23	2	f	30	4.5	19.5	2000	80	Concrete	Concrete	Mix	Y
2	4	24	NA	f	40	NA	NA	NA	NA	Ground	Ground	Mix	Y
2	4	25	2	f	30	4.5	19.5	2000	80	Concrete	Concrete	Mix	Y
2	4	26	2	f	34	4.5	19.5	2000	80	Concrete	Concrete	Mix	Y
3	4	27	2	m	45	7	17	3500	140	Concrete	Concrete	Mix	Y
3	4	28	NA	m	47	0	24	0	0	Concrete	Concrete	Mix	Y
3	4	29	1	m	38	7	17	3500	140	Concrete	Concrete	Mix	Y
3	4	30	2	m	41	7	17	3500	140	Concrete	Concrete	Mix	Y
3	4	31	2	m	40	7	17	3500	140	Concrete	Concrete	Mix	Y
3	4	32	2	m	41	7	17	3500	140	Concrete	Concrete	Mix	Y
3	4	33	2	f	37	7	17	3500	140	Concrete	Concrete	Mix	Y
3	4	34	3	f	43	7	17	3500	140	Concrete	Concrete	Mix	Y
3	4	35	2	f	37	0	24	0	0	Concrete	Concrete	Mix	Y
3	4	36	2	f	41	7	17	3500	140	Concrete	Concrete	Mix	Y
3	4	37	2	f	40	7	17	3500	140	Concrete	Concrete	Mix	Y
3	4	38	2	f	23	7	17	3500	140	Concrete	Concrete	Mix	Y
4	4	39	3	m	20	7	17	5000	225	Concrete	Concrete	Mix	Y
4	4	40	3	m	42	7	17	5000	225	Concrete	Concrete	Mix	Y
4	4	41	3	m	20	4	20	5000	225	Concrete	Concrete	Mix	Y
4	4	42	3	m	24	4	20	3000	120	Concrete	Concrete	Ground	N
4	4	43	2	m	28	4	20	3000	120	Concrete	Concrete	Ground	N
4	4	44	3	m	27	7	17	5000	225	Concrete	Concrete	Mix	Y
4	4	45	3	f	45	7	17	5000	225	Concrete	Concrete	Mix	Y
4	4	46	2	f	40	7	17	5000	225	Concrete	Concrete	Mix	Y
4	4	47	2	f	35	7	17	5000	225	Concrete	Concrete	Ground	N
4	4	48	3	f	42	7	17	5000	225	Concrete	Concrete	Mix	Y
4	4	49	3	f	30	7	17	5000	225	Concrete	Concrete	Mix	Y
4	4	50	3	f	20	7	17	5000	225	Concrete	Concrete	Mix	Y
5	4	51	2	f	46	0	0	2000	30	Ground	Sand	Ground	N
5	4	52	3	f	33	5.5	0	2000	30	Ground	Sand	Ground	N
5	4	53	NA	f	35	NA	0	NA	NA	Ground	Sand	Ground	N
5	4	54	3	f	41	5	0	3000	300	Ground	Sand	Ground	Y
5	4	55	2	f	39	5	0	3000	300	Ground	Sand	Ground	Y
5	4	56	NA	f	30	NA	NA	NA	NA	Ground	Sand	Ground	Y
5	4	57	3	f	31	0	0	2000	20	Ground	Sand	Ground	Y
5	4	58	3	f	34	5.5	0	2000	30	Ground	Sand	Ground	N
5	4	59	2	f	50	5.5	0	2000	30	Ground	Sand	Ground	N
5	4	60	NA	f	29	NA	0	NA	NA	Ground	Sand	Ground	N
5	4	61	3	f	30	5	0	3000	300	Ground	Sand	Ground	Y
5	4	62	NA	f	40	NA	0	NA	NA	Ground	Sand	Ground	N
5	4	63	3	f	25	0	0	2000	20	Ground	Sand	Ground	N
5	4	64	2	f	35	5.5	0	2000	30	Ground	Sand	Ground	N
5	4	65	3	f	30	0	0	2000	20	Ground	Sand	Ground	N
6	4	66	3	m	40	6	18	3000	120	Ground	Ground	Mix	Y
6	4	67	NA	m	28	0	24	0	0	Ground	Ground	Ground	N
6	4	68	3	m	35	6	18	3000	120	Ground	Ground	Mix	Y
6	4	69	3	m	35	6	18	3000	120	Ground	Ground	Mix	Y
6	4	70	2	f	35	6	18	3000	120	Ground	Ground	Mix	Y
6	4	71	3	m	22	6	18	3000	120	Concrete	Ground	Mix	Y
6	4	72	2	f	40	6	18	3000	120	Ground	Ground	Mix	Y
6	4	73	2	f	30	6	18	3000	120	Ground	Ground	Mix	Y
6	4	74	NA	f	18	0	24	0	0	Ground	Ground	Mix	Y
6	4	75	3	f	40	4	20	2000	80	Concrete	Ground	Mix	Y
6	4	76	2	f	40	6	18	3000	120	Ground	Ground	Mix	Y
6	4	77	3	f	26	0	24	0	0	Concrete	Ground	Mix	Y
6	4	78	NA	m	40	0	24	0	0	Ground	Ground	Ground	N
7	4	79	NA	f	56	0	24	0	0	Concrete	Concrete	Mix	N
7	4	80	2	f	50	2.5	21.5	3000	90	Concrete	Concrete	Mix	N
7	4	81	NA	f	50	NA	NA	NA	NA	Concrete	Concrete	Mix	N
7	4	82	2	f	32	2.5	21.5	3000	90	Concrete	Concrete	Mix	N
7	4	83	2	f	50	2.5	21.5	3000	90	Concrete	Concrete	Mix	N
8	4	84	2	m	20	7.5	16.5	2000	80	Ground	Ground	Ground	Y
8	4	85	1	f	35	7.5	16.5	2000	80	Concrete	Concrete	Ground	Y
8	4	86	3	f	30	7.5	16.5	2000	80	Concrete	Concrete	Ground	Y
8	4	87	3	f	24	7.5	16.5	2000	80	Concrete	Concrete	Ground	Y
8	4	88	1	f	25	7.5	16.5	2000	80	Concrete	Concrete	Ground	Y
8	4	89	3	f	18	7.5	16.5	2000	80	Ground	Ground	Ground	Y
9	4	90	NA	m	55	NA	NA	NA	NA	Ground	Ground	Ground	Y
9	4	91	2	f	29	5	19	4000	60	Ground	Ground	Ground	Y
9	4	92	3	f	49	5	19	4000	60	Ground	Ground	Ground	Y
9	4	93	2	f	49	5	19	4000	60	Ground	Ground	Ground	Y
9	4	94	3	f	40	5	19	4000	60	Ground	Ground	Ground	Y
10	4	95	2	m	40	3	21	4000	120	Ground	Ground	Mix	Y
10	4	96	2	f	32	3	21	4000	120	Ground	Ground	Mix	Y
10	4	97	3	f	28	3	21	4000	120	Ground	Ground	Mix	Y
10	4	98	2	f	43	3	21	4000	120	Ground	Ground	Mix	Y
10	4	99	NA	f	28	NA	NA	NA	NA	Ground	Ground	Mix	Y
10	4	100	3	f	25	3	21	4000	120	Ground	Ground	Mix	Y
11	4	101	NA	m	40	0	24	0	0	Ground	Ground	Ground	N
11	4	102	3	m	5	7	17	3000	60	Ground	Ground	Ground	N
11	4	103	3	f	60	7	17	3000	60	Ground	Ground	Ground	N
11	4	104	2	f	40	7	17	3000	60	Ground	Ground	Ground	N
11	4	105	2	f	40	7	17	3000	60	Ground	Ground	Ground	N
12	4	106	0	m	30	2	22	30	10	Concrete	Concrete	Ground	N
12	4	107	3	f	15	0	24	0	0	Concrete	Concrete	Ground	N
12	4	108	2	f	53	2	22	10	25	Concrete	Concrete	Ground	N
12	4	109	3	f	50	2	22	10	25	Concrete	Ground	Ground	N
12	4	110	3	m	5	2	22	10	30	Concrete	Concrete	Ground	N
13	4	111	3	f	30	6	18	6000	120	Concrete	Concrete	Mix	Y
13	4	112	3	f	35	6	18	6000	120	Concrete	Concrete	Mix	Y
13	4	113	3	f	40	6	18	6000	120	Concrete	Concrete	Mix	Y
13	4	114	2	f	38	6	18	6000	120	Concrete	Concrete	Mix	Y
13	4	115	3	f	32	6	18	6000	120	Concrete	Concrete	Mix	Y
14	4	116	2	f	30	4.5	0	3000	20	Ground	Concrete	Mix	Y
14	4	117	3	f	30	4.5	0	3000	20	Ground	Concrete	Mix	Y
14	4	118	2	f	30	4.5	0	3000	20	Ground	Concrete	Mix	Y
15	4	119	2	f	65	3.5	0	1000	180	Ground	Sand	Ground	Y
15	4	120	3	f	40	3.5	0	1000	180	Ground	Sand	Ground	Y
15	4	121	2	f	60	3.5	0	1000	180	Ground	Sand	Ground	Y
15	4	122	3	f	60	3.5	0	1000	180	Ground	Sand	Ground	Y
1	5	1	2	m	25	5	19	12000	120	Ground	Ground	Mix	Y
1	5	2	3	m	28	0	24	0	0	Ground	Ground	Mix	Y
1	5	3	1	m	20	5	19	12000	120	Ground	Ground	Mix	Y
1	5	4	2	f	28	5	19	12000	120	Ground	Ground	Mix	Y
1	5	5	1	f	25	5	19	12000	120	Ground	Ground	Mix	Y
1	5	6	1	f	18	5	19	12000	120	Ground	Ground	Mix	Y
1	5	7	2	f	18	5	19	12000	120	Ground	Ground	Mix	Y
1	5	8	3	f	18	5	19	12000	120	Ground	Ground	Ground	N
1	5	9	3	f	45	5	19	12000	120	Ground	Ground	Mix	Y
1	5	10	2	f	22	5	19	12000	120	Ground	Ground	Mix	Y
1	5	11	3	f	16	5	19	12000	120	Ground	Ground	Mix	Y
1	5	12	1	f	25	5	19	12000	120	Ground	Ground	Mix	Y
2	5	13	3	m	21	6	18	2000	80	Concrete	Ground	Mix	Y
2	5	14	1	m	29	0	23.5	1000	25	Ground	Ground	Mix	Y
2	5	15	NA	m	50	0	24	0	0	Concrete	Ground	Mix	Y
2	5	16	1	m	30	6	18	2000	80	Ground	Ground	Mix	Y
2	5	17	2	m	16	6	18	2000	80	Concrete	Concrete	Mix	Y
2	5	18	2	f	22	6	18	2000	80	Concrete	Concrete	Mix	Y
2	5	19	NA	f	25	NA	NA	2000	80	Concrete	Concrete	Mix	Y
2	5	20	NA	f	22	NA	NA	2000	80	Ground	Ground	Mix	Y
2	5	21	2	f	30	6	18	2000	80	Concrete	Concrete	Mix	Y
2	5	22	2	f	30	0	24	0	0	Concrete	Concrete	Mix	Y
2	5	23	2	f	30	6	18	2000	80	Concrete	Concrete	Mix	Y
2	5	24	NA	f	40	NA	NA	2000	80	Ground	Ground	Mix	Y
2	5	25	2	f	30	6	18	2000	80	Concrete	Concrete	Mix	Y
2	5	26	1	f	34	6	18	2000	80	Concrete	Concrete	Mix	Y
3	5	27	2	m	45	7.5	16.5	7000	280	Concrete	Concrete	Mix	Y
3	5	28	2	m	47	7.5	16.5	7000	280	Concrete	Concrete	Mix	Y
3	5	29	2	m	38	7.5	16.5	7000	280	Concrete	Concrete	Mix	Y
3	5	30	2	m	41	0	24	0	0	Concrete	Concrete	Mix	Y
3	5	31	2	m	40	7.5	16.5	7000	280	Concrete	Concrete	Mix	Y
3	5	32	1	m	41	7.5	16.5	7000	280	Concrete	Concrete	Mix	Y
3	5	33	2	f	37	7.5	16.5	7000	280	Concrete	Concrete	Mix	Y
3	5	34	3	f	43	7.5	16.5	7000	280	Concrete	Concrete	Mix	Y
3	5	35	2	f	37	0	24	0	0	Concrete	Concrete	Mix	Y
3	5	36	0	f	41	7.5	16.5	7000	280	Concrete	Concrete	Mix	Y
3	5	37	2	f	40	7.5	16.5	7000	280	Concrete	Concrete	Mix	Y
3	5	38	2	f	23	0	24	0	0	Concrete	Concrete	Mix	Y
4	5	39	1	m	20	7.5	16.5	7000	315	Concrete	Concrete	Mix	Y
4	5	40	1	m	42	7.5	16.5	7000	315	Concrete	Concrete	Mix	Y
4	5	41	3	m	20	5	19	7000	315	Concrete	Concrete	Mix	Y
4	5	42	2	m	24	5	19	3000	120	Concrete	Concrete	Ground	N
4	5	43	1	m	28	5	19	3000	120	Concrete	Concrete	Ground	N
4	5	44	2	m	27	0	24	0	0	Concrete	Concrete	Mix	Y
4	5	45	2	f	45	7.5	16.5	7000	315	Concrete	Concrete	Mix	Y
4	5	46	1	f	40	7.5	16.5	7000	315	Concrete	Concrete	Mix	Y
4	5	47	1	f	35	5	19	NA	120	Concrete	Concrete	Ground	N
4	5	48	3	f	42	7.5	16.5	7000	315	Concrete	Concrete	Mix	Y
4	5	49	3	f	30	7.5	16.5	7000	315	Concrete	Concrete	Mix	Y
4	5	50	2	f	20	7.5	16.5	7000	315	Concrete	Concrete	Mix	Y
5	5	51	2	f	46	0	0	2000	30	Ground	Sand	Ground	N
5	5	52	2	f	33	5.5	0	2000	30	Ground	Sand	Ground	N
5	5	53	NA	f	35	NA	0	NA	NA	Ground	Sand	Ground	N
5	5	54	3	f	41	5	0	3000	300	Ground	Sand	Ground	Y
5	5	55	2	f	39	5	0	3000	300	Ground	Sand	Ground	Y
5	5	56	NA	f	30	NA	NA	NA	NA	Ground	Sand	Ground	Y
5	5	57	1	f	31	0	0	2000	20	Ground	Sand	Ground	Y
5	5	58	3	f	34	5.5	0	2000	30	Ground	Sand	Ground	N
5	5	59	2	f	50	5.5	0	2000	30	Ground	Sand	Ground	N
5	5	60	NA	f	29	NA	0	NA	NA	Ground	Sand	Ground	N
5	5	61	2	f	30	5	0	3000	300	Ground	Sand	Ground	Y
5	5	62	NA	f	40	NA	0	NA	NA	Ground	Sand	Ground	N
5	5	63	3	f	25	0	0	2000	20	Ground	Sand	Ground	N
5	5	64	3	f	35	5.5	0	2000	30	Ground	Sand	Ground	N
5	5	65	2	f	30	0	0	2000	20	Ground	Sand	Ground	N
6	5	66	3	m	40	0	24	0	0	Ground	Ground	Mix	Y
6	5	67	NA	m	28	0	24	0	0	Ground	Ground	Ground	N
6	5	68	NA	m	35	0	24	0	0	Ground	Ground	Mix	Y
6	5	69	3	m	35	7	17	3000	120	Ground	Ground	Mix	Y
6	5	70	2	f	35	7	17	3000	120	Ground	Ground	Mix	Y
6	5	71	3	m	22	7	17	3000	120	Concrete	Ground	Mix	Y
6	5	72	2	f	40	7	17	3000	120	Ground	Ground	Mix	Y
6	5	73	2	f	30	7	17	3000	120	Ground	Ground	Mix	Y
6	5	74	NA	f	18	0	24	0	0	Ground	Ground	Mix	Y
6	5	75	3	f	40	7	17	3000	120	Concrete	Ground	Mix	Y
6	5	76	1	f	40	7	17	3000	120	Ground	Ground	Mix	Y
6	5	77	3	f	26	7	17	3000	120	Concrete	Ground	Mix	Y
6	5	78	2	m	40	0	24	0	0	Ground	Ground	Ground	N
7	5	79	3	f	56	4	17	5000	150	Concrete	Concrete	Mix	N
7	5	80	2	f	50	4	17	5000	150	Concrete	Concrete	Mix	N
7	5	81	NA	f	50	NA	NA	NA	NA	Concrete	Concrete	Mix	N
7	5	82	2	f	32	4	17	5000	150	Concrete	Concrete	Mix	N
7	5	83	2	f	50	7.5	13.5	1000	30	Concrete	Concrete	Mix	N
8	5	84	2	m	20	6	18	2000	80	Ground	Ground	Ground	Y
8	5	85	2	f	35	6	18	2000	80	Concrete	Concrete	Ground	Y
8	5	86	3	f	30	6	18	2000	80	Concrete	Concrete	Ground	Y
8	5	87	3	f	24	6	18	2000	80	Concrete	Concrete	Ground	Y
8	5	88	2	f	25	6	18	2000	80	Concrete	Concrete	Ground	Y
8	5	89	2	f	18	6	18	2000	80	Ground	Ground	Ground	Y
9	5	90	NA	m	55	NA	NA	NA	NA	Ground	Ground	Ground	Y
9	5	91	2	f	29	4.5	19.5	4000	60	Ground	Ground	Ground	Y
9	5	92	3	f	49	4.5	19.5	4000	60	Ground	Ground	Ground	Y
9	5	93	1	f	49	4.5	19.5	4000	60	Ground	Ground	Ground	Y
9	5	94	3	f	40	4.5	19.5	4000	60	Ground	Ground	Ground	Y
10	5	95	2	m	40	0	24	0	0	Ground	Ground	Mix	Y
10	5	96	1	f	32	2	22	4000	120	Ground	Ground	Mix	Y
10	5	97	3	f	28	2	22	4000	120	Ground	Ground	Mix	Y
10	5	98	2	f	43	2	22	4000	120	Ground	Ground	Mix	Y
10	5	99	NA	f	28	NA	NA	NA	NA	Ground	Ground	Mix	Y
10	5	100	3	f	25	2	22	4000	120	Ground	Ground	Mix	Y
11	5	101	NA	m	40	NA	NA	NA	NA	Ground	Ground	Ground	N
11	5	102	3	m	5	5	19	3000	60	Ground	Ground	Ground	N
11	5	103	3	f	60	0	24	0	0	Ground	Ground	Ground	N
11	5	104	2	f	40	5	19	3000	60	Ground	Ground	Ground	N
11	5	105	2	f	40	5	19	3000	60	Ground	Ground	Ground	N
12	5	106	2	m	30	0	24	0	0	Concrete	Concrete	Ground	N
12	5	107	3	f	15	3	21	10	25	Concrete	Concrete	Ground	N
12	5	108	2	f	53	3	21	10	25	Concrete	Concrete	Ground	N
12	5	109	1	f	50	3	21	10	25	Concrete	Ground	Ground	N
12	5	110	3	m	5	3	21	10	30	Concrete	Concrete	Ground	N
13	5	111	3	f	30	7	17	6000	120	Concrete	Concrete	Mix	Y
13	5	112	2	f	35	7	17	6000	120	Concrete	Concrete	Mix	Y
13	5	113	2	f	40	7	17	6000	120	Concrete	Concrete	Mix	Y
13	5	114	2	f	38	7	17	6000	120	Concrete	Concrete	Mix	Y
13	5	115	3	f	32	7	17	6000	120	Concrete	Concrete	Mix	Y
14	5	116	1	f	30	4.5	0	3000	20	Ground	Concrete	Mix	Y
14	5	117	3	f	30	4.5	0	3000	20	Ground	Concrete	Mix	Y
14	5	118	2	f	30	4.5	0	3000	20	Ground	Concrete	Mix	Y
15	5	119	2	f	65	3.5	0	1000	180	Ground	Sand	Ground	Y
15	5	120	1	f	40	3.5	0	1000	180	Ground	Sand	Ground	Y
15	5	121	2	f	60	3.5	0	1000	180	Ground	Sand	Ground	Y
15	5	122	2	f	60	3.5	0	1000	180	Ground	Sand	Ground	Y
1	6	1	2	m	25	7	17	12000	120	Ground	Ground	Mix	Y
1	6	2	1	m	28	0	24	12000	120	Ground	Ground	Mix	Y
1	6	3	1	m	20	7	17	12000	120	Ground	Ground	Mix	Y
1	6	4	2	f	28	0	24	0	0	Ground	Ground	Mix	Y
1	6	5	1	f	25	7	17	12000	120	Ground	Ground	Mix	Y
1	6	6	1	f	18	7	17	12000	120	Ground	Ground	Mix	Y
1	6	7	2	f	18	7	17	12000	120	Ground	Ground	Mix	Y
1	6	8	2	f	18	7	17	12000	120	Ground	Ground	Ground	N
1	6	9	3	f	45	7	17	12000	120	Ground	Ground	Mix	Y
1	6	10	1	f	22	7	17	12000	120	Ground	Ground	Mix	Y
1	6	11	2	f	16	7	17	12000	120	Ground	Ground	Mix	Y
1	6	12	2	f	25	7	17	12000	120	Ground	Ground	Mix	Y
2	6	13	3	m	21	4	20	2000	80	Concrete	Ground	Mix	Y
2	6	14	2	m	29	0	23.5	1000	25	Ground	Ground	Mix	Y
2	6	15	NA	m	50	0	24	0	0	Concrete	Ground	Mix	Y
2	6	16	NA	m	30	0	24	0	0	Ground	Ground	Mix	Y
2	6	17	2	m	16	4	20	2000	80	Concrete	Concrete	Mix	Y
2	6	18	2	f	22	4	20	2000	80	Concrete	Concrete	Mix	Y
2	6	19	NA	f	25	NA	NA	NA	NA	Concrete	Concrete	Mix	Y
2	6	20	NA	f	22	NA	NA	NA	NA	Ground	Ground	Mix	Y
2	6	21	3	f	30	4	20	2000	80	Concrete	Concrete	Mix	Y
2	6	22	2	f	30	4	20	2000	80	Concrete	Concrete	Mix	Y
2	6	23	1	f	30	4	20	2000	80	Concrete	Concrete	Mix	Y
2	6	24	NA	f	40	4	20	NA	NA	Ground	Ground	Mix	Y
2	6	25	2	f	30	4	20	2000	80	Concrete	Concrete	Mix	Y
2	6	26	1	f	34	4	20	2000	80	Concrete	Concrete	Mix	Y
3	6	27	2	m	45	7	17	2500	100	Concrete	Concrete	Mix	Y
3	6	28	2	m	47	7	17	2500	100	Concrete	Concrete	Mix	Y
3	6	29	2	m	38	7	17	2500	100	Concrete	Concrete	Mix	Y
3	6	30	2	m	41	0	24	0	0	Concrete	Concrete	Mix	Y
3	6	31	1	m	40	7	17	2500	100	Concrete	Concrete	Mix	Y
3	6	32	2	m	41	7	17	2500	100	Concrete	Concrete	Mix	Y
3	6	33	2	f	37	7	17	2500	100	Concrete	Concrete	Mix	Y
3	6	34	0	f	43	7	17	2500	100	Concrete	Concrete	Mix	Y
3	6	35	1	f	37	7	17	2500	100	Concrete	Concrete	Mix	Y
3	6	36	2	f	41	7	17	2500	100	Concrete	Concrete	Mix	Y
3	6	37	2	f	40	7	17	2500	100	Concrete	Concrete	Mix	Y
3	6	38	2	f	23	0	24	0	0	Concrete	Concrete	Mix	Y
4	6	39	2	m	20	5.5	18.5	4000	180	Concrete	Concrete	Mix	Y
4	6	40	NA	m	42	NA	NA	NA	NA	Concrete	Concrete	Mix	Y
4	6	41	3	m	20	4	20	4000	180	Concrete	Concrete	Mix	Y
4	6	42	3	m	24	4	20	3000	120	Concrete	Concrete	Ground	N
4	6	43	1	m	28	4	20	3000	120	Concrete	Concrete	Ground	N
4	6	44	2	m	27	5.5	18.5	4000	180	Concrete	Concrete	Mix	Y
4	6	45	2	f	45	5.5	18.5	4000	180	Concrete	Concrete	Mix	Y
4	6	46	2	f	40	5.5	18.5	4000	180	Concrete	Concrete	Mix	Y
4	6	47	2	f	35	0	24	0	0	Concrete	Concrete	Ground	N
4	6	48	3	f	42	0	24	0	0	Concrete	Concrete	Mix	Y
4	6	49	2	f	30	5.5	18.5	4000	180	Concrete	Concrete	Mix	Y
4	6	50	2	f	20	5.5	18.5	4000	180	Concrete	Concrete	Mix	Y
5	6	51	2	f	46	0	0	2000	30	Ground	Sand	Ground	N
5	6	52	3	f	33	5.5	0	2000	30	Ground	Sand	Ground	N
5	6	53	NA	f	35	NA	0	NA	NA	Ground	Sand	Ground	N
5	6	54	3	f	41	5	0	3000	300	Ground	Sand	Ground	Y
5	6	55	2	f	39	0	0	2000	20	Ground	Sand	Ground	Y
5	6	56	NA	f	30	NA	NA	NA	NA	Ground	Sand	Ground	Y
5	6	57	1	f	31	0	0	2000	20	Ground	Sand	Ground	Y
5	6	58	2	f	34	5.5	0	2000	30	Ground	Sand	Ground	N
5	6	59	2	f	50	5.5	0	2000	30	Ground	Sand	Ground	N
5	6	60	NA	f	29	NA	0	NA	NA	Ground	Sand	Ground	N
5	6	61	3	f	30	0	0	2000	20	Ground	Sand	Ground	Y
5	6	62	NA	f	40	NA	0	NA	NA	Ground	Sand	Ground	N
5	6	63	3	f	25	0	0	2000	20	Ground	Sand	Ground	N
5	6	64	0	f	35	5.5	0	2000	30	Ground	Sand	Ground	N
5	6	65	1	f	30	0	0	2000	20	Ground	Sand	Ground	N
6	6	66	NA	m	40	7	17	2000	80	Ground	Ground	Mix	Y
6	6	67	1	m	28	7	17	3000	120	Ground	Ground	Ground	N
6	6	68	3	m	35	7	17	2000	80	Ground	Ground	Mix	Y
6	6	69	3	m	35	7	17	2000	80	Ground	Ground	Mix	Y
6	6	70	1	f	35	7	17	2000	80	Ground	Ground	Mix	Y
6	6	71	2	m	22	7	17	2000	80	Concrete	Ground	Mix	Y
6	6	72	3	f	40	7	17	2000	80	Ground	Ground	Mix	Y
6	6	73	1	f	30	7	17	2000	80	Ground	Ground	Mix	Y
6	6	74	NA	f	18	0	24	0	0	Ground	Ground	Mix	Y
6	6	75	3	f	40	4	20	1000	40	Concrete	Ground	Mix	Y
6	6	76	1	f	40	7	17	2000	80	Ground	Ground	Mix	Y
6	6	77	2	f	26	7	17	2000	80	Concrete	Ground	Mix	Y
6	6	78	2	m	40	4	20	1000	40	Ground	Ground	Ground	N
7	6	79	2	f	56	2	22	3000	90	Concrete	Concrete	Mix	N
7	6	80	1	f	50	2	22	3000	90	Concrete	Concrete	Mix	N
7	6	81	NA	f	50	NA	NA	NA	NA	Concrete	Concrete	Mix	N
7	6	82	3	f	32	2	22	3000	90	Concrete	Concrete	Mix	N
7	6	83	3	f	50	2	22	3000	90	Concrete	Concrete	Mix	N
8	6	84	2	m	20	6	18	2000	80	Ground	Ground	Ground	Y
8	6	85	1	f	35	6	18	2000	80	Concrete	Concrete	Ground	Y
8	6	86	3	f	30	6	18	2000	80	Concrete	Concrete	Ground	Y
8	6	87	3	f	24	6	18	2000	80	Concrete	Concrete	Ground	Y
8	6	88	1	f	25	6	18	2000	80	Concrete	Concrete	Ground	Y
8	6	89	2	f	18	6	18	2000	80	Ground	Ground	Ground	Y
9	6	90	NA	m	55	NA	NA	NA	NA	Ground	Ground	Ground	Y
9	6	91	2	f	29	4.5	19.5	4000	60	Ground	Ground	Ground	Y
9	6	92	3	f	49	4.5	19.5	4000	60	Ground	Ground	Ground	Y
9	6	93	1	f	49	4.5	19.5	4000	60	Ground	Ground	Ground	Y
9	6	94	2	f	40	4.5	19.5	4000	60	Ground	Ground	Ground	Y
10	6	95	NA	m	40	0	24	0	0	Ground	Ground	Mix	Y
10	6	96	NA	f	32	NA	NA	NA	NA	Ground	Ground	Mix	Y
10	6	97	3	f	28	2	22	4000	120	Ground	Ground	Mix	Y
10	6	98	2	f	43	2	22	4000	120	Ground	Ground	Mix	Y
10	6	99	NA	f	28	NA	NA	NA	NA	Ground	Ground	Mix	Y
10	6	100	3	f	25	2	22	4000	120	Ground	Ground	Mix	Y
11	6	101	NA	m	40	NA	NA	NA	NA	Ground	Ground	Ground	N
11	6	102	3	m	5	7.5	16.5	3000	60	Ground	Ground	Ground	N
11	6	103	NA	f	60	NA	NA	NA	NA	Ground	Ground	Ground	N
11	6	104	3	f	40	7.5	16.5	3000	60	Ground	Ground	Ground	N
11	6	105	1	f	40	7.5	16.5	3000	60	Ground	Ground	Ground	N
12	6	106	3	m	30	0	24	0	0	Concrete	Concrete	Ground	N
12	6	107	3	f	15	3	21	10	25	Concrete	Concrete	Ground	N
12	6	108	2	f	53	3	21	10	25	Concrete	Concrete	Ground	N
12	6	109	NA	f	50	3	21	10	25	Concrete	Ground	Ground	N
12	6	110	3	m	5	3	21	10	30	Concrete	Concrete	Ground	N
13	6	111	3	f	30	5	19	6000	120	Concrete	Concrete	Mix	Y
13	6	112	3	f	35	5	19	0	0	Concrete	Concrete	Mix	Y
13	6	113	3	f	40	5	19	6000	120	Concrete	Concrete	Mix	Y
13	6	114	0	f	38	5	19	6000	120	Concrete	Concrete	Mix	Y
13	6	115	NA	f	32	0	24	0	0	Concrete	Concrete	Mix	Y
14	6	116	2	f	30	4.5	0	3000	20	Ground	Concrete	Mix	Y
14	6	117	3	f	30	4.5	0	3000	20	Ground	Concrete	Mix	Y
14	6	118	2	f	30	4.5	0	3000	20	Ground	Concrete	Mix	Y
15	6	119	3	f	65	3.5	0	1000	180	Ground	Sand	Ground	Y
15	6	120	3	f	40	3.5	0	1000	180	Ground	Sand	Ground	Y
15	6	121	2	f	60	3.5	0	1000	180	Ground	Sand	Ground	Y
15	6	122	3	f	60	3.5	0	1000	180	Ground	Sand	Ground	Y

## Sheet: Sheet6
Camp	Time of examination	Elephant ID	Wound Score	Sex	Age	Work Hour	Walk Distance Day	Walk Time Day	Hook	Floor Night
1	1	1	2	m	25	4.5	6000	60	N	Ground
1	1	2	2	m	28	4.5	6000	60	N	Ground
1	1	3	2	m	20	4.5	6000	60	Y	Ground
1	1	4	0	f	28	4.5	6000	60	Y	Ground
1	1	5	0	f	25	4.5	6000	60	N	Ground
1	1	6	0	f	18	4.5	6000	60	Y	Ground
1	1	7	2	f	18	4.5	6000	60	Y	Ground
1	1	8	2	f	18	4.5	6000	60	N	Ground
1	1	9	0	f	45	4.5	6000	60	Y	Ground
1	1	10	2	f	22	4.5	6000	60	N	Ground
1	1	11	2	f	16	4.5	0	0	Y	Ground
1	1	12	NA	f	25	4.5	6000	60	N	Ground
2	1	13	2	m	21	4.5	2000	80	Y	Ground
2	1	14	2	m	29	0	1000	25	Y	Ground
2	1	15	2	m	50	4.5	2000	80	Y	Ground
2	1	16	2	m	30	4.5	2000	80	Y	Ground
2	1	17	2	m	16	4.5	2000	80	Y	Concrete
2	1	18	2	f	22	4.5	2000	80	Y	Concrete
2	1	19	2	f	25	4.5	2000	80	Y	Concrete
2	1	20	2	f	22	4.5	2000	80	Y	Ground
2	1	21	2	f	30	4.5	2000	80	Y	Concrete
2	1	22	2	f	30	4.5	2000	80	Y	Concrete
2	1	23	2	f	30	4.5	2000	80	Y	Concrete
2	1	24	1	f	40	4.5	2000	80	Y	Ground
2	1	25	NA	f	30	NA	NA	NA	Y	Concrete
2	1	26	NA	f	34	NA	NA	NA	Y	Concrete
3	1	27	2	m	45	7	6500	260	Y	Concrete
3	1	28	1	m	47	7	6500	260	Y	Concrete
3	1	29	0	m	38	7	6500	260	Y	Concrete
3	1	30	1	m	41	7	6500	260	Y	Concrete
3	1	31	1	m	40	7	6500	260	Y	Concrete
3	1	32	1	m	41	5	6500	260	Y	Concrete
3	1	33	1	f	37	7	6500	260	Y	Concrete
3	1	34	1	f	43	7	6500	260	Y	Concrete
3	1	35	1	f	37	7	6500	260	Y	Concrete
3	1	36	2	f	41	7	6500	260	Y	Concrete
3	1	37	1	f	40	7	6500	260	Y	Concrete
3	1	38	1	f	23	7	6500	260	Y	Concrete
4	1	39	1	m	20	8	10000	450	Y	Concrete
4	1	40	1	m	42	8	10000	450	Y	Concrete
4	1	41	1	m	20	0	0	0	Y	Concrete
4	1	42	NA	m	24	0	0	0	Y	Concrete
4	1	43	2	m	28	7	4000	160	Y	Concrete
4	1	44	0	m	27	8	10000	450	Y	Concrete
4	1	45	NA	f	45	8	10000	450	Y	Concrete
4	1	46	2	f	40	8	10000	450	Y	Concrete
4	1	47	NA	f	35	8	10000	450	Y	Concrete
4	1	48	2	f	42	8	10000	450	Y	Concrete
4	1	49	2	f	30	8	10000	450	Y	Concrete
4	1	50	2	f	20	8	10000	450	Y	Concrete
5	1	51	2	f	46	0	2000	30	N	Sand
5	1	52	2	f	33	5.5	2000	30	N	Sand
5	1	53	2	f	35	5.5	2000	30	N	Sand
5	1	54	2	f	41	5	3000	300	N	Sand
5	1	55	2	f	39	5	3000	300	N	Sand
5	1	56	2	f	30	5	3000	300	N	Sand
5	1	57	2	f	31	0	2000	20	N	Sand
5	1	58	2	f	34	5.5	2000	30	N	Sand
5	1	59	2	f	50	5.5	2000	30	N	Sand
5	1	60	2	f	29	5.5	2000	30	N	Sand
5	1	61	2	f	30	5	3000	300	N	Sand
5	1	62	2	f	40	5.5	2000	30	N	Sand
5	1	63	NA	f	25	NA	NA	NA	N	Sand
5	1	64	NA	f	35	NA	NA	NA	N	Sand
5	1	65	NA	f	30	NA	NA	NA	N	Sand
6	1	66	0	m	40	0	0	0	Y	Ground
6	1	67	NA	m	28	0	0	0	Y	Ground
6	1	68	1	m	35	7	8000	320	Y	Ground
6	1	69	1	m	35	0	0	0	Y	Ground
6	1	70	2	f	35	7	8000	320	Y	Ground
6	1	71	NA	m	22	0	0	0	Y	Ground
6	1	72	2	f	40	7	8000	320	Y	Ground
6	1	73	1	f	30	7	8000	320	Y	Ground
6	1	74	NA	f	18	4	5000	200	Y	Ground
6	1	75	1	f	40	4	5000	200	Y	Ground
6	1	76	1	f	40	7	8000	320	Y	Ground
6	1	77	2	f	26	7	8000	320	Y	Ground
6	1	78	NA	m	40	NA	NA	NA	Y	Ground
7	1	79	2	f	56	5	3000	90	Y	Concrete
7	1	80	1	f	50	5	3000	90	Y	Concrete
7	1	81	1	f	50	5	3000	90	Y	Concrete
7	1	82	0	f	32	5	3000	90	Y	Concrete
7	1	83	NA	f	50	NA	NA	NA	Y	Concrete
8	1	84	1	m	20	7.5	2000	80	N	Ground
8	1	85	2	f	35	7.5	2000	80	N	Concrete
8	1	86	2	f	30	7.5	2000	80	N	Concrete
8	1	87	2	f	24	7.5	2000	80	N	Concrete
8	1	88	2	f	25	7.5	2000	80	N	Concrete
8	1	89	2	f	18	7.5	2000	80	N	Ground
9	1	90	1	m	55	2	4000	60	N	Ground
9	1	91	2	f	29	2	4000	60	N	Ground
9	1	92	0	f	49	2	4000	60	N	Ground
9	1	93	2	f	49	2	4000	60	N	Ground
9	1	94	NA	f	40	NA	NA	NA	N	Ground
10	1	95	NA	m	40	0	0	0	Y	Ground
10	1	96	2	f	32	7	8000	240	Y	Ground
10	1	97	2	f	28	7	8000	240	Y	Ground
10	1	98	2	f	43	7	8000	240	Y	Ground
10	1	99	2	f	28	7	8000	240	Y	Ground
10	1	100	2	f	25	7	8000	240	Y	Ground
11	1	101	2	m	40	6	0	0	N	Ground
11	1	102	2	m	5	6	3000	60	N	Ground
11	1	103	2	f	60	6	3000	60	N	Ground
11	1	104	2	f	40	6	3000	60	N	Ground
11	1	105	1	f	40	6	3000	60	N	Ground
12	1	106	2	m	30	1	30	10	Y	Concrete
12	1	107	1	f	15	1	10	25	Y	Concrete
12	1	108	1	f	53	1	10	25	Y	Concrete
12	1	109	1	f	50	1	10	25	Y	Ground
12	1	110	2	m	5	1	10	30	Y	Concrete
13	1	111	2	f	30	7	6000	120	N	Concrete
13	1	112	2	f	35	7	6000	120	N	Concrete
13	1	113	2	f	40	7	6000	120	N	Concrete
13	1	114	2	f	38	7	6000	120	N	Concrete
13	1	115	2	f	32	7	6000	120	N	Concrete
14	1	116	2	f	30	4.5	3000	120	N	Concrete
14	1	117	1	f	30	4.5	3000	120	N	Concrete
14	1	118	2	f	30	4.5	3000	120	N	Concrete
15	1	119	2	f	65	3.5	1000	180	N	Sand
15	1	120	2	f	40	3.5	1000	180	N	Sand
15	1	121	2	f	60	3.5	1000	180	N	Sand
15	1	122	2	f	60	3.5	1000	180	N	Sand
1	2	1	NA	m	25	NA	12000	120	N	Ground
1	2	2	1	m	28	7	12000	120	N	Ground
1	2	3	1	m	20	7	12000	120	Y	Ground
1	2	4	2	f	28	7	12000	120	Y	Ground
1	2	5	0	f	25	7	12000	120	N	Ground
1	2	6	2	f	18	7	12000	120	Y	Ground
1	2	7	2	f	18	7	12000	120	Y	Ground
1	2	8	0	f	18	7	12000	120	N	Ground
1	2	9	0	f	45	7	12000	120	Y	Ground
1	2	10	2	f	22	7	12000	120	N	Ground
1	2	11	2	f	16	7	12000	120	Y	Ground
1	2	12	2	f	25	7	12000	120	N	Ground
2	2	13	2	m	21	1	1000	40	Y	Ground
2	2	14	2	m	29	0	1000	25	Y	Ground
2	2	15	2	m	50	1	1000	40	Y	Ground
2	2	16	2	m	30	1	1000	40	Y	Ground
2	2	17	1	m	16	1	1000	40	Y	Concrete
2	2	18	2	f	22	1	1000	40	Y	Concrete
2	2	19	2	f	25	1	1000	40	Y	Concrete
2	2	20	NA	f	22	NA	NA	NA	Y	Ground
2	2	21	2	f	30	1	1000	40	Y	Concrete
2	2	22	2	f	30	1	1000	40	Y	Concrete
2	2	23	2	f	30	1	1000	40	Y	Concrete
2	2	24	0	f	40	0	1000	40	Y	Ground
2	2	25	1	f	30	1	1000	40	Y	Concrete
2	2	26	NA	f	34	NA	NA	NA	Y	Concrete
3	2	27	2	m	45	6	2500	100	Y	Concrete
3	2	28	1	m	47	6	2500	100	Y	Concrete
3	2	29	1	m	38	6	2500	100	Y	Concrete
3	2	30	NA	m	41	0	0	0	Y	Concrete
3	2	31	1	m	40	6	2500	100	Y	Concrete
3	2	32	1	m	41	6	2500	100	Y	Concrete
3	2	33	2	f	37	6	2500	100	Y	Concrete
3	2	34	2	f	43	6	2500	100	Y	Concrete
3	2	35	1	f	37	6	2500	100	Y	Concrete
3	2	36	2	f	41	6	2500	100	Y	Concrete
3	2	37	2	f	40	6	2500	100	Y	Concrete
3	2	38	0	f	23	6	2500	100	Y	Concrete
4	2	39	1	m	20	6	3000	135	Y	Concrete
4	2	40	2	m	42	6	3000	135	Y	Concrete
4	2	41	2	m	20	6	3000	135	Y	Concrete
4	2	42	2	m	24	6	3000	120	Y	Concrete
4	2	43	2	m	28	6	3000	120	Y	Concrete
4	2	44	NA	m	27	0	0	0	Y	Concrete
4	2	45	2	f	45	6	3000	135	Y	Concrete
4	2	46	2	f	40	6	3000	135	Y	Concrete
4	2	47	1	f	35	6	3000	135	Y	Concrete
4	2	48	2	f	42	6	3000	135	Y	Concrete
4	2	49	2	f	30	6	3000	135	Y	Concrete
4	2	50	2	f	20	6	3000	135	Y	Concrete
5	2	51	2	f	46	0	2000	30	N	Sand
5	2	52	2	f	33	5.5	2000	30	N	Sand
5	2	53	NA	f	35	NA	NA	NA	N	Sand
5	2	54	2	f	41	5	3000	300	N	Sand
5	2	55	2	f	39	5	3000	300	N	Sand
5	2	56	2	f	30	5	3000	300	N	Sand
5	2	57	2	f	31	0	2000	20	N	Sand
5	2	58	2	f	34	5.5	2000	30	N	Sand
5	2	59	2	f	50	5.5	2000	30	N	Sand
5	2	60	NA	f	29	NA	NA	NA	N	Sand
5	2	61	2	f	30	5	3000	300	N	Sand
5	2	62	NA	f	40	NA	NA	NA	N	Sand
5	2	63	2	f	25	0	2000	20	N	Sand
5	2	64	2	f	35	5.5	2000	30	N	Sand
5	2	65	2	f	30	0	2000	20	N	Sand
6	2	66	1	m	40	0	0	0	Y	Ground
6	2	67	2	m	28	7	3000	120	Y	Ground
6	2	68	2	m	35	7	4000	160	Y	Ground
6	2	69	2	m	35	7	4000	160	Y	Ground
6	2	70	1	f	35	7	4000	160	Y	Ground
6	2	71	2	m	22	7	4000	160	Y	Ground
6	2	72	2	f	40	7	4000	160	Y	Ground
6	2	73	1	f	30	7	4000	160	Y	Ground
6	2	74	NA	f	18	4	1500	60	Y	Ground
6	2	75	1	f	40	0	0	0	Y	Ground
6	2	76	1	f	40	7	4000	160	Y	Ground
6	2	77	NA	f	26	NA	NA	NA	Y	Ground
6	2	78	NA	m	40	NA	NA	NA	Y	Ground
7	2	79	2	f	56	4.5	3000	90	Y	Concrete
7	2	80	2	f	50	4.5	3000	90	Y	Concrete
7	2	81	NA	f	50	NA	NA	NA	Y	Concrete
7	2	82	1	f	32	4.5	3000	90	Y	Concrete
7	2	83	1	f	50	4.5	3000	90	Y	Concrete
8	2	84	2	m	20	8	2000	80	N	Ground
8	2	85	1	f	35	8	2000	80	N	Concrete
8	2	86	2	f	30	8	2000	80	N	Concrete
8	2	87	0	f	24	8	2000	80	N	Concrete
8	2	88	2	f	25	8	2000	80	N	Concrete
8	2	89	2	f	18	8	2000	80	N	Ground
9	2	90	2	m	55	2	4000	60	N	Ground
9	2	91	2	f	29	2	4000	60	N	Ground
9	2	92	2	f	49	2	4000	60	N	Ground
9	2	93	2	f	49	2	4000	60	N	Ground
9	2	94	2	f	40	2	4000	60	N	Ground
10	2	95	0	m	40	9	12000	360	Y	Ground
10	2	96	2	f	32	9	12000	360	Y	Ground
10	2	97	2	f	28	9	12000	360	Y	Ground
10	2	98	2	f	43	9	12000	360	Y	Ground
10	2	99	NA	f	28	NA	NA	NA	Y	Ground
10	2	100	2	f	25	9	12000	360	Y	Ground
11	2	101	2	m	40	7	1000	20	N	Ground
11	2	102	NA	m	5	NA	NA	NA	N	Ground
11	2	103	2	f	60	7	1000	20	N	Ground
11	2	104	2	f	40	7	1000	20	N	Ground
11	2	105	2	f	40	7	1000	20	N	Ground
12	2	106	2	m	30	3	30	10	Y	Concrete
12	2	107	2	f	15	3	10	25	Y	Concrete
12	2	108	1	f	53	3	10	25	Y	Concrete
12	2	109	2	f	50	3	10	25	Y	Ground
12	2	110	1	m	5	3	10	30	Y	Concrete
13	2	111	2	f	30	6.5	6000	120	N	Concrete
13	2	112	2	f	35	6.5	6000	120	N	Concrete
13	2	113	2	f	40	6.5	6000	120	N	Concrete
13	2	114	1	f	38	6.5	6000	120	N	Concrete
13	2	115	2	f	32	6.5	6000	120	N	Concrete
14	2	116	2	f	30	4.5	3000	120	N	Concrete
14	2	117	2	f	30	4.5	3000	120	N	Concrete
14	2	118	2	f	30	4.5	3000	120	N	Concrete
15	2	119	2	f	65	3.5	1000	180	N	Sand
15	2	120	2	f	40	3.5	1000	180	N	Sand
15	2	121	2	f	60	3.5	1000	180	N	Sand
15	2	122	1	f	60	3.5	1000	180	N	Sand
1	3	1	2	m	25	8.5	12000	120	N	Ground
1	3	2	2	m	28	8.5	12000	120	N	Ground
1	3	3	1	m	20	8.5	12000	120	Y	Ground
1	3	4	2	f	28	8.5	12000	120	Y	Ground
1	3	5	2	f	25	8.5	12000	120	N	Ground
1	3	6	2	f	18	8.5	12000	120	Y	Ground
1	3	7	2	f	18	8.5	12000	120	Y	Ground
1	3	8	2	f	18	8.5	12000	120	N	Ground
1	3	9	0	f	45	8.5	12000	120	Y	Ground
1	3	10	2	f	22	8.5	12000	120	N	Ground
1	3	11	2	f	16	8.5	12000	120	Y	Ground
1	3	12	2	f	25	8.5	12000	120	N	Ground
2	3	13	2	m	21	4	2000	80	Y	Ground
2	3	14	2	m	29	0	1000	25	Y	Ground
2	3	15	2	m	50	4	2000	80	Y	Ground
2	3	16	2	m	30	4	2000	80	Y	Ground
2	3	17	2	m	16	4	2000	80	Y	Concrete
2	3	18	2	f	22	4	2000	80	Y	Concrete
2	3	19	2	f	25	4	2000	80	Y	Concrete
2	3	20	NA	f	22	NA	NA	NA	Y	Ground
2	3	21	2	f	30	4	2000	80	Y	Concrete
2	3	22	2	f	30	4	2000	80	Y	Concrete
2	3	23	2	f	30	4	2000	80	Y	Concrete
2	3	24	NA	f	40	NA	NA	NA	Y	Ground
2	3	25	2	f	30	4	2000	80	Y	Concrete
2	3	26	2	f	34	4	2000	80	Y	Concrete
3	3	27	2	m	45	7	3500	140	Y	Concrete
3	3	28	2	m	47	0	0	0	Y	Concrete
3	3	29	2	m	38	7	3500	140	Y	Concrete
3	3	30	1	m	41	7	3500	140	Y	Concrete
3	3	31	1	m	40	7	3500	140	Y	Concrete
3	3	32	1	m	41	7	3500	140	Y	Concrete
3	3	33	1	f	37	0	0	0	Y	Concrete
3	3	34	2	f	43	7	3500	140	Y	Concrete
3	3	35	2	f	37	7	3500	140	Y	Concrete
3	3	36	2	f	41	7	3500	140	Y	Concrete
3	3	37	2	f	40	7	3500	140	Y	Concrete
3	3	38	2	f	23	7	3500	140	Y	Concrete
4	3	39	2	m	20	6.5	3000	135	Y	Concrete
4	3	40	1	m	42	6.5	3000	135	Y	Concrete
4	3	41	1	m	20	6.5	3000	135	Y	Concrete
4	3	42	2	m	24	6.5	4000	160	Y	Concrete
4	3	43	2	m	28	6.5	5000	200	Y	Concrete
4	3	44	0	m	27	0	0	0	Y	Concrete
4	3	45	2	f	45	6.5	3000	135	Y	Concrete
4	3	46	2	f	40	6.5	3000	135	Y	Concrete
4	3	47	2	f	35	6.5	3000	135	Y	Concrete
4	3	48	2	f	42	6.5	3000	135	Y	Concrete
4	3	49	2	f	30	6.5	3000	135	Y	Concrete
4	3	50	2	f	20	6.5	3000	135	Y	Concrete
5	3	51	2	f	46	0	2000	30	N	Sand
5	3	52	2	f	33	5.5	2000	30	N	Sand
5	3	53	NA	f	35	NA	NA	NA	N	Sand
5	3	54	0	f	41	5	3000	300	N	Sand
5	3	55	2	f	39	5	3000	300	N	Sand
5	3	56	NA	f	30	NA	NA	NA	N	Sand
5	3	57	2	f	31	0	2000	20	N	Sand
5	3	58	2	f	34	5.5	2000	30	N	Sand
5	3	59	2	f	50	5.5	2000	30	N	Sand
5	3	60	NA	f	29	NA	NA	NA	N	Sand
5	3	61	2	f	30	5	3000	300	N	Sand
5	3	62	NA	f	40	NA	NA	NA	N	Sand
5	3	63	2	f	25	0	2000	20	N	Sand
5	3	64	2	f	35	5.5	2000	30	N	Sand
5	3	65	2	f	30	0	2000	20	N	Sand
6	3	66	1	m	40	0	0	0	Y	Ground
6	3	67	2	m	28	6.5	3000	120	Y	Ground
6	3	68	2	m	35	6.5	6500	260	Y	Ground
6	3	69	1	m	35	6.5	6500	260	Y	Ground
6	3	70	NA	f	35	3.5	5000	200	Y	Ground
6	3	71	2	m	22	0	0	0	Y	Ground
6	3	72	2	f	40	6.5	6500	260	Y	Ground
6	3	73	2	f	30	6.5	6500	260	Y	Ground
6	3	74	NA	f	18	3.5	5000	200	Y	Ground
6	3	75	2	f	40	2	3000	120	Y	Ground
6	3	76	1	f	40	6.5	6500	260	Y	Ground
6	3	77	1	f	26	6.5	6500	260	Y	Ground
6	3	78	NA	m	40	NA	NA	NA	Y	Ground
7	3	79	2	f	56	5	3000	90	Y	Concrete
7	3	80	2	f	50	5	3000	90	Y	Concrete
7	3	81	NA	f	50	NA	NA	NA	Y	Concrete
7	3	82	1	f	32	5	3000	90	Y	Concrete
7	3	83	1	f	50	0	3000	90	Y	Concrete
8	3	84	1	m	20	6	2000	80	N	Ground
8	3	85	1	f	35	6	2000	80	N	Concrete
8	3	86	2	f	30	6	2000	80	N	Concrete
8	3	87	2	f	24	6	2000	80	N	Concrete
8	3	88	2	f	25	6	2000	80	N	Concrete
8	3	89	2	f	18	6	2000	80	N	Ground
9	3	90	2	m	55	5	4000	60	N	Ground
9	3	91	2	f	29	5	4000	60	N	Ground
9	3	92	2	f	49	5	4000	60	N	Ground
9	3	93	2	f	49	5	4000	60	N	Ground
9	3	94	2	f	40	5	4000	60	N	Ground
10	3	95	1	m	40	9	8000	240	Y	Ground
10	3	96	2	f	32	9	8000	240	Y	Ground
10	3	97	2	f	28	9	8000	240	Y	Ground
10	3	98	2	f	43	9	8000	240	Y	Ground
10	3	99	NA	f	28	NA	NA	NA	Y	Ground
10	3	100	2	f	25	9	8000	240	Y	Ground
11	3	101	0	m	40	4.5	3000	60	N	Ground
11	3	102	2	m	5	4.5	3000	60	N	Ground
11	3	103	2	f	60	0	0	0	N	Ground
11	3	104	2	f	40	4.5	3000	60	N	Ground
11	3	105	2	f	40	4.5	3000	60	N	Ground
12	3	106	2	m	30	3	30	10	Y	Concrete
12	3	107	2	f	15	3	10	25	Y	Concrete
12	3	108	2	f	53	3	10	25	Y	Concrete
12	3	109	0	f	50	3	10	25	Y	Ground
12	3	110	2	m	5	3	10	30	Y	Concrete
13	3	111	2	f	30	6	6000	120	N	Concrete
13	3	112	2	f	35	6	6000	120	N	Concrete
13	3	113	2	f	40	6	6000	120	N	Concrete
13	3	114	1	f	38	6	6000	120	N	Concrete
13	3	115	2	f	32	6	6000	120	N	Concrete
14	3	116	2	f	30	4.5	3000	120	N	Concrete
14	3	117	2	f	30	4.5	3000	120	N	Concrete
14	3	118	2	f	30	4.5	3000	120	N	Concrete
15	3	119	2	f	65	3.5	1000	180	N	Sand
15	3	120	2	f	40	3.5	1000	180	N	Sand
15	3	121	2	f	60	3.5	1000	180	N	Sand
15	3	122	2	f	60	3.5	1000	180	N	Sand
1	4	1	2	m	25	7	12000	120	N	Ground
1	4	2	2	m	28	7	12000	120	N	Ground
1	4	3	2	m	20	7	12000	120	Y	Ground
1	4	4	2	f	28	7	12000	120	Y	Ground
1	4	5	2	f	25	7	12000	120	N	Ground
1	4	6	1	f	18	7	12000	120	Y	Ground
1	4	7	2	f	18	7	12000	120	Y	Ground
1	4	8	2	f	18	7	12000	120	N	Ground
1	4	9	2	f	45	7	12000	120	Y	Ground
1	4	10	2	f	22	7	12000	120	N	Ground
1	4	11	2	f	16	7	12000	120	Y	Ground
1	4	12	2	f	25	7	12000	120	N	Ground
2	4	13	2	m	21	4.5	2000	80	Y	Ground
2	4	14	2	m	29	0	1000	25	Y	Ground
2	4	15	NA	m	50	0	0	0	Y	Ground
2	4	16	2	m	30	4.5	2000	80	Y	Ground
2	4	17	2	m	16	4.5	2000	80	Y	Concrete
2	4	18	2	f	22	4.5	2000	80	Y	Concrete
2	4	19	NA	f	25	NA	NA	NA	Y	Concrete
2	4	20	NA	f	22	NA	NA	NA	Y	Ground
2	4	21	1	f	30	4.5	2000	80	Y	Concrete
2	4	22	1	f	30	4.5	2000	80	Y	Concrete
2	4	23	2	f	30	4.5	2000	80	Y	Concrete
2	4	24	NA	f	40	NA	NA	NA	Y	Ground
2	4	25	2	f	30	4.5	2000	80	Y	Concrete
2	4	26	1	f	34	4.5	2000	80	Y	Concrete
3	4	27	2	m	45	7	3500	140	Y	Concrete
3	4	28	NA	m	47	0	0	0	Y	Concrete
3	4	29	2	m	38	7	3500	140	Y	Concrete
3	4	30	1	m	41	7	3500	140	Y	Concrete
3	4	31	1	m	40	7	3500	140	Y	Concrete
3	4	32	1	m	41	7	3500	140	Y	Concrete
3	4	33	2	f	37	7	3500	140	Y	Concrete
3	4	34	1	f	43	7	3500	140	Y	Concrete
3	4	35	1	f	37	0	0	0	Y	Concrete
3	4	36	1	f	41	7	3500	140	Y	Concrete
3	4	37	2	f	40	7	3500	140	Y	Concrete
3	4	38	0	f	23	7	3500	140	Y	Concrete
4	4	39	2	m	20	7	5000	225	Y	Concrete
4	4	40	2	m	42	7	5000	225	Y	Concrete
4	4	41	1	m	20	4	5000	225	Y	Concrete
4	4	42	2	m	24	4	3000	120	Y	Concrete
4	4	43	2	m	28	4	3000	120	Y	Concrete
4	4	44	2	m	27	7	5000	225	Y	Concrete
4	4	45	2	f	45	7	5000	225	Y	Concrete
4	4	46	2	f	40	7	5000	225	Y	Concrete
4	4	47	0	f	35	7	5000	225	Y	Concrete
4	4	48	2	f	42	7	5000	225	Y	Concrete
4	4	49	2	f	30	7	5000	225	Y	Concrete
4	4	50	2	f	20	7	5000	225	Y	Concrete
5	4	51	2	f	46	0	2000	30	N	Sand
5	4	52	2	f	33	5.5	2000	30	N	Sand
5	4	53	NA	f	35	NA	NA	NA	N	Sand
5	4	54	2	f	41	5	3000	300	N	Sand
5	4	55	2	f	39	5	3000	300	N	Sand
5	4	56	NA	f	30	NA	NA	NA	N	Sand
5	4	57	2	f	31	0	2000	20	N	Sand
5	4	58	2	f	34	5.5	2000	30	N	Sand
5	4	59	2	f	50	5.5	2000	30	N	Sand
5	4	60	NA	f	29	NA	NA	NA	N	Sand
5	4	61	2	f	30	5	3000	300	N	Sand
5	4	62	NA	f	40	NA	NA	NA	N	Sand
5	4	63	2	f	25	0	2000	20	N	Sand
5	4	64	2	f	35	5.5	2000	30	N	Sand
5	4	65	2	f	30	0	2000	20	N	Sand
6	4	66	1	m	40	6	3000	120	Y	Ground
6	4	67	NA	m	28	0	0	0	Y	Ground
6	4	68	2	m	35	6	3000	120	Y	Ground
6	4	69	2	m	35	6	3000	120	Y	Ground
6	4	70	1	f	35	6	3000	120	Y	Ground
6	4	71	2	m	22	6	3000	120	Y	Ground
6	4	72	1	f	40	6	3000	120	Y	Ground
6	4	73	2	f	30	6	3000	120	Y	Ground
6	4	74	NA	f	18	0	0	0	Y	Ground
6	4	75	2	f	40	4	2000	80	Y	Ground
6	4	76	2	f	40	6	3000	120	Y	Ground
6	4	77	1	f	26	0	0	0	Y	Ground
6	4	78	NA	m	40	0	0	0	Y	Ground
7	4	79	NA	f	56	0	0	0	Y	Concrete
7	4	80	2	f	50	2.5	3000	90	Y	Concrete
7	4	81	NA	f	50	NA	NA	NA	Y	Concrete
7	4	82	2	f	32	2.5	3000	90	Y	Concrete
7	4	83	2	f	50	2.5	3000	90	Y	Concrete
8	4	84	2	m	20	7.5	2000	80	N	Ground
8	4	85	2	f	35	7.5	2000	80	N	Concrete
8	4	86	2	f	30	7.5	2000	80	N	Concrete
8	4	87	2	f	24	7.5	2000	80	N	Concrete
8	4	88	2	f	25	7.5	2000	80	N	Concrete
8	4	89	2	f	18	7.5	2000	80	N	Ground
9	4	90	NA	m	55	NA	NA	NA	N	Ground
9	4	91	2	f	29	5	4000	60	N	Ground
9	4	92	2	f	49	5	4000	60	N	Ground
9	4	93	2	f	49	5	4000	60	N	Ground
9	4	94	2	f	40	5	4000	60	N	Ground
10	4	95	2	m	40	3	4000	120	Y	Ground
10	4	96	2	f	32	3	4000	120	Y	Ground
10	4	97	2	f	28	3	4000	120	Y	Ground
10	4	98	2	f	43	3	4000	120	Y	Ground
10	4	99	NA	f	28	NA	NA	NA	Y	Ground
10	4	100	2	f	25	3	4000	120	Y	Ground
11	4	101	NA	m	40	0	0	0	N	Ground
11	4	102	2	m	5	7	3000	60	N	Ground
11	4	103	0	f	60	7	3000	60	N	Ground
11	4	104	2	f	40	7	3000	60	N	Ground
11	4	105	2	f	40	7	3000	60	N	Ground
12	4	106	2	m	30	2	30	10	Y	Concrete
12	4	107	2	f	15	0	0	0	Y	Concrete
12	4	108	2	f	53	2	10	25	Y	Concrete
12	4	109	2	f	50	2	10	25	Y	Ground
12	4	110	2	m	5	2	10	30	Y	Concrete
13	4	111	2	f	30	6	6000	120	N	Concrete
13	4	112	2	f	35	6	6000	120	N	Concrete
13	4	113	2	f	40	6	6000	120	N	Concrete
13	4	114	2	f	38	6	6000	120	N	Concrete
13	4	115	2	f	32	6	6000	120	N	Concrete
14	4	116	2	f	30	4.5	3000	20	N	Concrete
14	4	117	2	f	30	4.5	3000	20	N	Concrete
14	4	118	2	f	30	4.5	3000	20	N	Concrete
15	4	119	2	f	65	3.5	1000	180	N	Sand
15	4	120	2	f	40	3.5	1000	180	N	Sand
15	4	121	2	f	60	3.5	1000	180	N	Sand
15	4	122	2	f	60	3.5	1000	180	N	Sand
1	5	1	2	m	25	5	12000	120	N	Ground
1	5	2	2	m	28	0	0	0	N	Ground
1	5	3	2	m	20	5	12000	120	Y	Ground
1	5	4	2	f	28	5	12000	120	Y	Ground
1	5	5	2	f	25	5	12000	120	N	Ground
1	5	6	2	f	18	5	12000	120	Y	Ground
1	5	7	2	f	18	5	12000	120	Y	Ground
1	5	8	2	f	18	5	12000	120	N	Ground
1	5	9	2	f	45	5	12000	120	Y	Ground
1	5	10	2	f	22	5	12000	120	N	Ground
1	5	11	2	f	16	5	12000	120	Y	Ground
1	5	12	2	f	25	5	12000	120	N	Ground
2	5	13	1	m	21	6	2000	80	Y	Ground
2	5	14	2	m	29	0	1000	25	Y	Ground
2	5	15	NA	m	50	0	0	0	Y	Ground
2	5	16	2	m	30	6	2000	80	Y	Ground
2	5	17	2	m	16	6	2000	80	Y	Concrete
2	5	18	2	f	22	6	2000	80	Y	Concrete
2	5	19	NA	f	25	NA	2000	80	Y	Concrete
2	5	20	NA	f	22	NA	2000	80	Y	Ground
2	5	21	2	f	30	6	2000	80	Y	Concrete
2	5	22	0	f	30	0	0	0	Y	Concrete
2	5	23	2	f	30	6	2000	80	Y	Concrete
2	5	24	NA	f	40	NA	2000	80	Y	Ground
2	5	25	2	f	30	6	2000	80	Y	Concrete
2	5	26	2	f	34	6	2000	80	Y	Concrete
3	5	27	2	m	45	7.5	7000	280	Y	Concrete
3	5	28	2	m	47	7.5	7000	280	Y	Concrete
3	5	29	2	m	38	7.5	7000	280	Y	Concrete
3	5	30	0	m	41	0	0	0	Y	Concrete
3	5	31	1	m	40	7.5	7000	280	Y	Concrete
3	5	32	2	m	41	7.5	7000	280	Y	Concrete
3	5	33	2	f	37	7.5	7000	280	Y	Concrete
3	5	34	1	f	43	7.5	7000	280	Y	Concrete
3	5	35	2	f	37	0	0	0	Y	Concrete
3	5	36	2	f	41	7.5	7000	280	Y	Concrete
3	5	37	2	f	40	7.5	7000	280	Y	Concrete
3	5	38	0	f	23	0	0	0	Y	Concrete
4	5	39	2	m	20	7.5	7000	315	Y	Concrete
4	5	40	2	m	42	7.5	7000	315	Y	Concrete
4	5	41	2	m	20	5	7000	315	Y	Concrete
4	5	42	0	m	24	5	3000	120	Y	Concrete
4	5	43	2	m	28	5	3000	120	Y	Concrete
4	5	44	0	m	27	0	0	0	Y	Concrete
4	5	45	2	f	45	7.5	7000	315	Y	Concrete
4	5	46	1	f	40	7.5	7000	315	Y	Concrete
4	5	47	2	f	35	5	NA	120	Y	Concrete
4	5	48	1	f	42	7.5	7000	315	Y	Concrete
4	5	49	2	f	30	7.5	7000	315	Y	Concrete
4	5	50	2	f	20	7.5	7000	315	Y	Concrete
5	5	51	2	f	46	0	2000	30	N	Sand
5	5	52	2	f	33	5.5	2000	30	N	Sand
5	5	53	NA	f	35	NA	NA	NA	N	Sand
5	5	54	2	f	41	5	3000	300	N	Sand
5	5	55	2	f	39	5	3000	300	N	Sand
5	5	56	NA	f	30	NA	NA	NA	N	Sand
5	5	57	2	f	31	0	2000	20	N	Sand
5	5	58	2	f	34	5.5	2000	30	N	Sand
5	5	59	2	f	50	5.5	2000	30	N	Sand
5	5	60	NA	f	29	NA	NA	NA	N	Sand
5	5	61	2	f	30	5	3000	300	N	Sand
5	5	62	NA	f	40	NA	NA	NA	N	Sand
5	5	63	2	f	25	0	2000	20	N	Sand
5	5	64	2	f	35	5.5	2000	30	N	Sand
5	5	65	2	f	30	0	2000	20	N	Sand
6	5	66	1	m	40	0	0	0	Y	Ground
6	5	67	NA	m	28	0	0	0	Y	Ground
6	5	68	NA	m	35	0	0	0	Y	Ground
6	5	69	1	m	35	7	3000	120	Y	Ground
6	5	70	1	f	35	7	3000	120	Y	Ground
6	5	71	2	m	22	7	3000	120	Y	Ground
6	5	72	1	f	40	7	3000	120	Y	Ground
6	5	73	2	f	30	7	3000	120	Y	Ground
6	5	74	NA	f	18	0	0	0	Y	Ground
6	5	75	2	f	40	7	3000	120	Y	Ground
6	5	76	2	f	40	7	3000	120	Y	Ground
6	5	77	2	f	26	7	3000	120	Y	Ground
6	5	78	1	m	40	0	0	0	Y	Ground
7	5	79	2	f	56	4	5000	150	Y	Concrete
7	5	80	1	f	50	4	5000	150	Y	Concrete
7	5	81	NA	f	50	NA	NA	NA	Y	Concrete
7	5	82	2	f	32	4	5000	150	Y	Concrete
7	5	83	1	f	50	7.5	1000	30	Y	Concrete
8	5	84	2	m	20	6	2000	80	N	Ground
8	5	85	2	f	35	6	2000	80	N	Concrete
8	5	86	2	f	30	6	2000	80	N	Concrete
8	5	87	2	f	24	6	2000	80	N	Concrete
8	5	88	2	f	25	6	2000	80	N	Concrete
8	5	89	2	f	18	6	2000	80	N	Ground
9	5	90	NA	m	55	NA	NA	NA	N	Ground
9	5	91	2	f	29	4.5	4000	60	N	Ground
9	5	92	2	f	49	4.5	4000	60	N	Ground
9	5	93	2	f	49	4.5	4000	60	N	Ground
9	5	94	2	f	40	4.5	4000	60	N	Ground
10	5	95	2	m	40	0	0	0	Y	Ground
10	5	96	2	f	32	2	4000	120	Y	Ground
10	5	97	2	f	28	2	4000	120	Y	Ground
10	5	98	2	f	43	2	4000	120	Y	Ground
10	5	99	NA	f	28	NA	NA	NA	Y	Ground
10	5	100	2	f	25	2	4000	120	Y	Ground
11	5	101	NA	m	40	NA	NA	NA	N	Ground
11	5	102	2	m	5	5	3000	60	N	Ground
11	5	103	0	f	60	0	0	0	N	Ground
11	5	104	2	f	40	5	3000	60	N	Ground
11	5	105	2	f	40	5	3000	60	N	Ground
12	5	106	2	m	30	0	0	0	Y	Concrete
12	5	107	1	f	15	3	10	25	Y	Concrete
12	5	108	2	f	53	3	10	25	Y	Concrete
12	5	109	1	f	50	3	10	25	Y	Ground
12	5	110	2	m	5	3	10	30	Y	Concrete
13	5	111	2	f	30	7	6000	120	N	Concrete
13	5	112	2	f	35	7	6000	120	N	Concrete
13	5	113	0	f	40	7	6000	120	N	Concrete
13	5	114	2	f	38	7	6000	120	N	Concrete
13	5	115	2	f	32	7	6000	120	N	Concrete
14	5	116	2	f	30	4.5	3000	20	N	Concrete
14	5	117	2	f	30	4.5	3000	20	N	Concrete
14	5	118	2	f	30	4.5	3000	20	N	Concrete
15	5	119	2	f	65	3.5	1000	180	N	Sand
15	5	120	2	f	40	3.5	1000	180	N	Sand
15	5	121	2	f	60	3.5	1000	180	N	Sand
15	5	122	2	f	60	3.5	1000	180	N	Sand
1	6	1	2	m	25	7	12000	120	N	Ground
1	6	2	0	m	28	0	12000	120	N	Ground
1	6	3	2	m	20	7	12000	120	Y	Ground
1	6	4	2	f	28	0	0	0	Y	Ground
1	6	5	2	f	25	7	12000	120	N	Ground
1	6	6	2	f	18	7	12000	120	Y	Ground
1	6	7	2	f	18	7	12000	120	Y	Ground
1	6	8	2	f	18	7	12000	120	N	Ground
1	6	9	2	f	45	7	12000	120	Y	Ground
1	6	10	2	f	22	7	12000	120	N	Ground
1	6	11	2	f	16	7	12000	120	Y	Ground
1	6	12	2	f	25	7	12000	120	N	Ground
2	6	13	2	m	21	4	2000	80	Y	Ground
2	6	14	2	m	29	0	1000	25	Y	Ground
2	6	15	NA	m	50	0	0	0	Y	Ground
2	6	16	NA	m	30	0	0	0	Y	Ground
2	6	17	2	m	16	4	2000	80	Y	Concrete
2	6	18	2	f	22	4	2000	80	Y	Concrete
2	6	19	NA	f	25	NA	NA	NA	Y	Concrete
2	6	20	NA	f	22	NA	NA	NA	Y	Ground
2	6	21	1	f	30	4	2000	80	Y	Concrete
2	6	22	1	f	30	4	2000	80	Y	Concrete
2	6	23	2	f	30	4	2000	80	Y	Concrete
2	6	24	NA	f	40	4	NA	NA	Y	Ground
2	6	25	2	f	30	4	2000	80	Y	Concrete
2	6	26	2	f	34	4	2000	80	Y	Concrete
3	6	27	2	m	45	7	2500	100	Y	Concrete
3	6	28	1	m	47	7	2500	100	Y	Concrete
3	6	29	1	m	38	7	2500	100	Y	Concrete
3	6	30	0	m	41	0	0	0	Y	Concrete
3	6	31	2	m	40	7	2500	100	Y	Concrete
3	6	32	2	m	41	7	2500	100	Y	Concrete
3	6	33	2	f	37	7	2500	100	Y	Concrete
3	6	34	2	f	43	7	2500	100	Y	Concrete
3	6	35	1	f	37	7	2500	100	Y	Concrete
3	6	36	1	f	41	7	2500	100	Y	Concrete
3	6	37	1	f	40	7	2500	100	Y	Concrete
3	6	38	0	f	23	0	0	0	Y	Concrete
4	6	39	2	m	20	5.5	4000	180	Y	Concrete
4	6	40	NA	m	42	NA	NA	NA	Y	Concrete
4	6	41	2	m	20	4	4000	180	Y	Concrete
4	6	42	2	m	24	4	3000	120	Y	Concrete
4	6	43	2	m	28	4	3000	120	Y	Concrete
4	6	44	1	m	27	5.5	4000	180	Y	Concrete
4	6	45	2	f	45	5.5	4000	180	Y	Concrete
4	6	46	2	f	40	5.5	4000	180	Y	Concrete
4	6	47	2	f	35	0	0	0	Y	Concrete
4	6	48	1	f	42	0	0	0	Y	Concrete
4	6	49	2	f	30	5.5	4000	180	Y	Concrete
4	6	50	2	f	20	5.5	4000	180	Y	Concrete
5	6	51	2	f	46	0	2000	30	N	Sand
5	6	52	2	f	33	5.5	2000	30	N	Sand
5	6	53	NA	f	35	NA	NA	NA	N	Sand
5	6	54	2	f	41	5	3000	300	N	Sand
5	6	55	2	f	39	0	2000	20	N	Sand
5	6	56	NA	f	30	NA	NA	NA	N	Sand
5	6	57	2	f	31	0	2000	20	N	Sand
5	6	58	2	f	34	5.5	2000	30	N	Sand
5	6	59	2	f	50	5.5	2000	30	N	Sand
5	6	60	NA	f	29	NA	NA	NA	N	Sand
5	6	61	2	f	30	0	2000	20	N	Sand
5	6	62	NA	f	40	NA	NA	NA	N	Sand
5	6	63	2	f	25	0	2000	20	N	Sand
5	6	64	2	f	35	5.5	2000	30	N	Sand
5	6	65	2	f	30	0	2000	20	N	Sand
6	6	66	NA	m	40	7	2000	80	Y	Ground
6	6	67	2	m	28	7	3000	120	Y	Ground
6	6	68	2	m	35	7	2000	80	Y	Ground
6	6	69	2	m	35	7	2000	80	Y	Ground
6	6	70	2	f	35	7	2000	80	Y	Ground
6	6	71	2	m	22	7	2000	80	Y	Ground
6	6	72	2	f	40	7	2000	80	Y	Ground
6	6	73	2	f	30	7	2000	80	Y	Ground
6	6	74	NA	f	18	0	0	0	Y	Ground
6	6	75	1	f	40	4	1000	40	Y	Ground
6	6	76	2	f	40	7	2000	80	Y	Ground
6	6	77	2	f	26	7	2000	80	Y	Ground
6	6	78	1	m	40	4	1000	40	Y	Ground
7	6	79	2	f	56	2	3000	90	Y	Concrete
7	6	80	0	f	50	2	3000	90	Y	Concrete
7	6	81	NA	f	50	NA	NA	NA	Y	Concrete
7	6	82	1	f	32	2	3000	90	Y	Concrete
7	6	83	2	f	50	2	3000	90	Y	Concrete
8	6	84	2	m	20	6	2000	80	N	Ground
8	6	85	2	f	35	6	2000	80	N	Concrete
8	6	86	2	f	30	6	2000	80	N	Concrete
8	6	87	2	f	24	6	2000	80	N	Concrete
8	6	88	2	f	25	6	2000	80	N	Concrete
8	6	89	2	f	18	6	2000	80	N	Ground
9	6	90	NA	m	55	NA	NA	NA	N	Ground
9	6	91	2	f	29	4.5	4000	60	N	Ground
9	6	92	2	f	49	4.5	4000	60	N	Ground
9	6	93	2	f	49	4.5	4000	60	N	Ground
9	6	94	2	f	40	4.5	4000	60	N	Ground
10	6	95	NA	m	40	0	0	0	Y	Ground
10	6	96	NA	f	32	NA	NA	NA	Y	Ground
10	6	97	2	f	28	2	4000	120	Y	Ground
10	6	98	2	f	43	2	4000	120	Y	Ground
10	6	99	NA	f	28	NA	NA	NA	Y	Ground
10	6	100	2	f	25	2	4000	120	Y	Ground
11	6	101	NA	m	40	NA	NA	NA	N	Ground
11	6	102	2	m	5	7.5	3000	60	N	Ground
11	6	103	NA	f	60	NA	NA	NA	N	Ground
11	6	104	2	f	40	7.5	3000	60	N	Ground
11	6	105	2	f	40	7.5	3000	60	N	Ground
12	6	106	2	m	30	0	0	0	Y	Concrete
12	6	107	1	f	15	3	10	25	Y	Concrete
12	6	108	2	f	53	3	10	25	Y	Concrete
12	6	109	NA	f	50	3	10	25	Y	Ground
12	6	110	1	m	5	3	10	30	Y	Concrete
13	6	111	2	f	30	5	6000	120	N	Concrete
13	6	112	2	f	35	5	0	0	N	Concrete
13	6	113	2	f	40	5	6000	120	N	Concrete
13	6	114	2	f	38	5	6000	120	N	Concrete
13	6	115	NA	f	32	0	0	0	N	Concrete
14	6	116	2	f	30	4.5	3000	20	N	Concrete
14	6	117	2	f	30	4.5	3000	20	N	Concrete
14	6	118	2	f	30	4.5	3000	20	N	Concrete
15	6	119	2	f	65	3.5	1000	180	N	Sand
15	6	120	2	f	40	3.5	1000	180	N	Sand
15	6	121	2	f	60	3.5	1000	180	N	Sand
15	6	122	2	f	60	3.5	1000	180	N	Sand
